# Supplementary material for: Structural variant analysis of a cancer reference cell line sample using multiple sequencing technologies
Source: Genome Biol. 2022 Dec 13;23:255. doi: 10.1186/s13059-022-02816-6 (PMC9746098; doi:10.1186/s13059-022-02816-6)
Supplement: Supplementary file 4 — Additional file 4: Supplementary Table S4. SV High Confidence Consensus Call Set. The SVs from initial callset are further filtered based on consensus scores, SVs that were called in at least two platform call sets by multiple software tools were selected. Additional filtering applied to remove overlap SVs and SVs on the blacklist regions as well as the on three chromosomal regions with normal loss of heterozygosity LOH (chr6p, chr16q, and chrX) to obtain a high-confidence call set. multiple break point events were named as BNDs and further characterized in Additional file 15. [file 13059_2022_2816_MOESM4_ESM.xlsx]

## Sheet: Table S4
SV_id	Chrom1	Pos1	Chrom2	Pos2	SV_Size or breakpoints distance	SV_type	# Replicates called	Called by Pacbio	Called by Nanopore	Called by HiC	Called by Illumina	Called by 10X
chr1_669501_chr1_669502_+-	chr1	669501	chr1	669502	75	INS	2	1	1	0	0	0
chr1_964661_chr1_964780_+-	chr1	964661	chr1	964780	-112	DEL	2	1	1	0	0	0
chr1_1117831_chr22_20272153_++	chr1	1117831	chr22	20272153	0	TRA	57	1	1	0	1	1
chr1_1119512_chr22_20302979_++	chr1	1119512	chr22	20302979	0	TRA	43	1	1	0	1	1
chr1_1141429_chr1_1141430_+-	chr1	1141429	chr1	1141430	59	INS	2	1	1	0	0	0
chr1_1192665_chr1_1192666_+-	chr1	1192665	chr1	1192666	94	INS	2	1	1	0	0	0
chr1_1605511_chr1_1605595_++	chr1	1605511	chr1	1605595	-72	DEL	2	1	1	0	0	0
chr1_1979465_chr1_1979466_+-	chr1	1979465	chr1	1979466	279	INS	2	1	1	0	0	0
chr1_3299693_chr1_3300302_++	chr1	3299693	chr1	3300302	-670	DEL	2	1	1	0	0	0
chr1_8502130_chr1_8502130_+-	chr1	8502130	chr1	8502130	87	INS	2	1	1	0	0	0
chr1_9357666_chr1_9377061_+-	chr1	9357666	chr1	9377061	-19398	DEL	37	1	1	0	1	0
chr1_9495567_chr1_36665592_-+	chr1	9495567	chr1	36665592	27169806	DUP	47	1	1	1	1	1
chr1_11522794_chr1_11522794_+-	chr1	11522794	chr1	11522794	613	INS	3	1	1	0	0	0
chr1_13239707_chr1_13239707_+-	chr1	13239707	chr1	13239707	52	INS	2	1	1	0	0	0
chr1_18604738_chr1_18604795_++	chr1	18604738	chr1	18604795	-56	DEL	2	1	1	0	0	0
chr1_18825345_chr1_18825619_++	chr1	18825345	chr1	18825619	-274	DEL	3	1	1	0	0	0
chr1_18926035_chr1_18926035_+-	chr1	18926035	chr1	18926035	568	INS	3	1	1	0	0	0
chr1_20623754_chr1_20623754_+-	chr1	20623754	chr1	20623754	1219	INS	2	1	1	0	0	0
chr1_22416023_chr1_22416181_+-	chr1	22416023	chr1	22416181	-157	DEL	37	1	1	0	1	0
chr1_22826964_chr1_22827019_+-	chr1	22826964	chr1	22827019	-56	DEL	4	0	1	0	1	0
chr1_23935813_chr1_23935873_+-	chr1	23935813	chr1	23935873	-56	DEL	2	1	1	0	0	0
chr1_25906228_chr1_25913034_-+	chr1	25906228	chr1	25913034	6805	DUP	36	0	1	0	1	0
chr1_26947726_chr1_85899162_++	chr1	26947726	chr1	85899162	58951394	INV	31	0	0	0	1	1
chr1_27128358_chr1_85910215_++	chr1	27128358	chr1	85910215	58781855	INV	29	0	0	0	1	1
chr1_27487599_chr1_27487627_+-	chr1	27487599	chr1	27487627	53	INS	3	1	1	0	0	0
chr1_30651347_chr1_30651951_+-	chr1	30651347	chr1	30651951	779	DUP	2	1	1	0	0	0
chr1_31595269_chr1_31595328_++	chr1	31595269	chr1	31595328	-58	DEL	2	1	1	0	0	0
chr1_36665592_chr1_9495571_++	chr1	36665592	chr1	9495571	27170021	INV	4	1	0	0	0	1
chr1_36962345_chr1_36962412_+-	chr1	36962345	chr1	36962412	-67	DEL	15	1	1	0	1	0
chr1_38506974_chr1_38507043_+-	chr1	38506974	chr1	38507043	-69	DEL	13	1	0	0	1	0
chr1_39504596_chr1_39504596_+-	chr1	39504596	chr1	39504596	453	INS	3	1	1	0	0	0
chr1_39664508_chr1_39664509_+-	chr1	39664508	chr1	39664509	1486	INS	2	1	1	0	0	0
chr1_40771431_chr1_40933167_-+	chr1	40771431	chr1	40933167	161742	DUP	56	1	0	0	1	1
chr1_41544953_chr1_41545006_+-	chr1	41544953	chr1	41545006	338	INS	2	1	1	0	0	0
chr1_42290399_chr1_47434266_-+	chr1	42290399	chr1	47434266	5143858	DUP	38	1	0	0	1	1
chr1_42324125_chr1_42324125_+-	chr1	42324125	chr1	42324125	151	INS	3	1	1	0	0	0
chr1_44707160_chr1_44721553_-+	chr1	44707160	chr1	44721553	14392	DUP	36	1	1	0	1	0
chr1_51527023_chr1_51714502_-+	chr1	51527023	chr1	51714502	187480	DUP	52	1	1	0	1	1
chr1_52103426_chr18_57611619_++	chr1	52103426	chr18	57611619	0	TRA	49	1	1	0	1	1
chr1_58064887_chr1_58560457_+-	chr1	58064887	chr1	58560457	-495566	DEL	55	1	1	0	1	1
chr1_60085919_chr1_60085923_+-	chr1	60085919	chr1	60085923	82	INS	2	1	1	0	0	0
chr1_64201479_chr1_64201480_+-	chr1	64201479	chr1	64201480	213	INS	2	1	1	0	0	0
chr1_65872344_chr1_65872413_+-	chr1	65872344	chr1	65872413	-69	DEL	9	0	1	0	1	0
chr1_69606524_chr20_72846_++	chr1	69606524	chr20	72846	0	TRA	39	0	1	0	1	1
chr1_69916099_chr1_69916118_+-	chr1	69916099	chr1	69916118	873	INS	3	1	1	0	0	0
chr1_74452380_chr1_74452489_-+	chr1	74452380	chr1	74452489	-109	DEL	16	0	1	0	1	0
chr1_74671149_chr1_74671245_+-	chr1	74671149	chr1	74671245	-98	DEL	2	1	1	0	0	0
chr1_75962664_chr1_75962731_+-	chr1	75962664	chr1	75962731	-66	DEL	2	1	1	0	0	0
chr1_76544338_chr14_84192657_++	chr1	76544338	chr14	84192657	0	TRA	51	1	1	0	1	1
chr1_77229481_chr1_77235972_-+	chr1	77229481	chr1	77235972	6492	DUP	34	0	1	0	1	0
chr1_78734293_chr1_78734454_+-	chr1	78734293	chr1	78734454	-161	DEL	28	1	0	0	1	0
chr1_80329265_chr1_80329341_+-	chr1	80329265	chr1	80329341	-87	DEL	2	1	1	0	0	0
chr1_83169155_chr1_83169237_+-	chr1	83169155	chr1	83169237	-82	DEL	11	1	1	0	1	0
chr1_84446212_chr6_88844792_++	chr1	84446212	chr6	88844792	0	TRA	44	1	1	0	1	1
chr1_84987631_chr1_84987666_+-	chr1	84987631	chr1	84987666	58	INS	2	1	1	0	0	0
chr1_85445215_chr1_85445455_+-	chr1	85445215	chr1	85445455	-240	DEL	37	1	1	0	1	0
chr1_86449423_chr1_86449540_+-	chr1	86449423	chr1	86449540	-116	DEL	26	1	1	0	1	0
chr1_87543906_chr1_87546416_+-	chr1	87543906	chr1	87546416	-2508	DEL	35	1	0	0	1	0
chr1_89625830_chr14_64980026_++	chr1	89625830	chr14	64980026	0	TRA	49	1	1	1	1	1
chr1_90183813_chr1_90183814_+-	chr1	90183813	chr1	90183814	61	INS	2	1	1	0	0	0
chr1_91668603_chr1_91669288_+-	chr1	91668603	chr1	91669288	-686	DEL	3	1	1	0	0	0
chr1_94813795_chr1_94845608_+-	chr1	94813795	chr1	94845608	-31809	DEL	55	1	1	0	1	1
chr1_95996223_chr7_66433859_++	chr1	95996223	chr7	66433859	0	TRA	37	1	1	0	1	1
chr1_96000149_chr7_66439961_++	chr1	96000149	chr7	66439961	0	TRA	42	1	1	0	1	1
chr1_103460414_chr1_103460472_+-	chr1	103460414	chr1	103460472	-58	DEL	15	1	1	0	1	0
chr1_104691582_chr1_104692796_+-	chr1	104691582	chr1	104692796	-1214	DEL	32	1	1	0	1	0
chr1_106299772_chr1_106300264_+-	chr1	106299772	chr1	106300264	-492	DEL	37	1	1	0	1	0
chr1_109418915_chr1_109421815_-+	chr1	109418915	chr1	109421815	2901	DUP	34	0	1	0	1	0
chr1_114265458_chr1_114272009_-+	chr1	114265458	chr1	114272009	6550	DUP	28	0	1	0	1	0
chr1_117676492_chrX_85391361_++	chr1	117676492	chrX	85391361	0	TRA	55	1	1	0	1	1
chr1_118319036_chr1_118319130_+-	chr1	118319036	chr1	118319130	327	INS	2	1	1	0	0	0
chr1_118319207_chr1_118319208_+-	chr1	118319207	chr1	118319208	66	INS	2	1	1	0	0	0
chr1_118321763_chr14_96603756_++	chr1	118321763	chr14	96603756	0	TRA	49	1	0	0	1	1
chr1_118365034_chr1_118365034_+-	chr1	118365034	chr1	118365034	338	INS	4	1	1	0	0	0
chr1_120145943_chr14_97754891_++	chr1	120145943	chr14	97754891	0	TRA	31	1	1	0	1	1
chr1_121399102_chr1_121399165_+-	chr1	121399102	chr1	121399165	-63	DEL	3	1	1	0	0	0
chr1_121734760_chr11_57887405_++	chr1	121734760	chr11	57887405	0	TRA	34	1	0	0	1	1
chr1_143246985_chr1_143246986_+-	chr1	143246985	chr1	143246986	164	INS	2	1	1	0	0	0
chr1_146015597_chr1_146036200_+-	chr1	146015597	chr1	146036200	-20598	DEL	34	1	1	0	1	0
chr1_146880524_chr1_146880631_+-	chr1	146880524	chr1	146880631	-106	DEL	16	1	0	0	1	0
chr1_147931938_chr13_51248066_--	chr1	147931938	chr13	51248066	0	TRA	15	0	1	0	1	1
chr1_147937744_chr13_51251300_++	chr1	147937744	chr13	51251300	0	TRA	19	0	1	0	1	1
chr1_149799780_chr1_150031619_-+	chr1	149799780	chr1	150031619	231824	DUP	38	0	0	0	1	1
chr1_151769290_chr1_151769294_+-	chr1	151769290	chr1	151769294	90	INS	2	1	1	0	0	0
chr1_156836735_chr1_156836788_+-	chr1	156836735	chr1	156836788	-52	DEL	3	1	1	0	0	0
chr1_156918007_chr1_156930481_+-	chr1	156918007	chr1	156930481	12473	DUP	36	1	1	0	1	0
chr1_157035919_chr1_157035976_+-	chr1	157035919	chr1	157035976	-58	DEL	2	1	1	0	0	0
chr1_157982549_chr1_169157261_++	chr1	157982549	chr1	169157261	11174710	INV	35	1	1	0	1	0
chr1_157982885_chr1_167425550_+-	chr1	157982885	chr1	167425550	9442666	BND	35	1	1	0	1	0
chr1_161010383_chr1_161027397_+-	chr1	161010383	chr1	161027397	-17014	DEL	36	1	1	0	1	0
chr1_161978673_chr1_161978724_+-	chr1	161978673	chr1	161978724	-52	DEL	2	0	1	0	1	0
chr1_163700883_chr1_163700945_+-	chr1	163700883	chr1	163700945	-62	DEL	15	1	1	0	1	0
chr1_167425529_chr1_169160691_++	chr1	167425529	chr1	169160691	1734771	INV	61	1	0	0	1	1
chr1_167517562_chr7_102016998_++	chr1	167517562	chr7	102016998	0	TRA	20	0	1	0	1	0
chr1_168073753_chr1_168073825_+-	chr1	168073753	chr1	168073825	-72	DEL	14	1	1	0	1	0
chr1_178232952_chr1_178283989_-+	chr1	178232952	chr1	178283989	51038	DUP	33	0	0	0	1	1
chr1_180989355_chr1_180989414_+-	chr1	180989355	chr1	180989414	-59	DEL	15	1	1	0	1	0
chr1_182741582_chr1_182741707_++	chr1	182741582	chr1	182741707	-130	DEL	3	1	1	0	0	0
chr1_183614197_chr1_183614323_++	chr1	183614197	chr1	183614323	-151	DEL	2	1	1	0	0	0
chr1_183614469_chr1_183614590_+-	chr1	183614469	chr1	183614590	-150	DEL	2	1	1	0	0	0
chr1_186868660_chr1_186879338_-+	chr1	186868660	chr1	186879338	10677	DUP	36	1	1	0	1	0
chr1_186878259_chr1_186878261_+-	chr1	186878259	chr1	186878261	76	INS	4	1	1	0	0	0
chr1_192139766_chr1_192158347_+-	chr1	192139766	chr1	192158347	-18580	DEL	37	1	1	0	1	0
chr1_194481986_chr1_194485184_++	chr1	194481986	chr1	194485184	-3320	DEL	2	1	1	0	0	0
chr1_196464971_chr1_196465128_+-	chr1	196464971	chr1	196465128	-157	DEL	36	1	1	0	1	0
chr1_203608934_chr4_170021784_++	chr1	203608934	chr4	170021784	0	TRA	44	1	1	1	1	1
chr1_203769833_chr4_169867809_++	chr1	203769833	chr4	169867809	0	TRA	53	1	1	0	1	1
chr1_205603554_chr1_205603555_+-	chr1	205603554	chr1	205603555	132	INS	2	1	1	0	0	0
chr1_205985737_chr1_205985738_+-	chr1	205985737	chr1	205985738	116	INS	3	1	1	0	0	0
chr1_206927197_chr1_206927262_+-	chr1	206927197	chr1	206927262	-65	DEL	15	1	1	0	1	0
chr1_211111800_chr1_211111917_++	chr1	211111800	chr1	211111917	-115	DEL	2	1	1	0	0	0
chr1_216030528_chr1_216030529_+-	chr1	216030528	chr1	216030529	130	INS	2	1	1	0	0	0
chr1_218599134_chr1_218599135_+-	chr1	218599134	chr1	218599135	145	INS	2	1	1	0	0	0
chr1_218988268_chr1_218988268_+-	chr1	218988268	chr1	218988268	1158	INS	2	1	1	0	0	0
chr1_223827731_chr1_223844190_-+	chr1	223827731	chr1	223844190	16459	DUP	35	1	1	0	1	0
chr1_225967593_chr1_225967714_-+	chr1	225967593	chr1	225967714	-121	DEL	26	1	1	0	1	0
chr1_226869732_chr19_1923698_-+	chr1	226869732	chr19	1923698	0	TRA	18	0	1	0	1	0
chr1_226875549_chr19_1923532_++	chr1	226875549	chr19	1923532	0	TRA	28	0	1	0	1	0
chr1_229421752_chr1_229421752_+-	chr1	229421752	chr1	229421752	189	INS	3	1	1	0	0	0
chr1_230237738_chr1_230237799_+-	chr1	230237738	chr1	230237799	-60	DEL	15	1	1	0	1	0
chr1_232369079_chr1_232369080_+-	chr1	232369079	chr1	232369080	88	INS	2	1	1	0	0	0
chr1_239732574_chr1_239732751_+-	chr1	239732574	chr1	239732751	-206	DEL	2	1	1	0	0	0
chr1_242313367_chr1_242313480_+-	chr1	242313367	chr1	242313480	-113	DEL	17	0	1	0	1	0
chr1_243097382_chr1_243099624_++	chr1	243097382	chr1	243099624	-2243	DEL	5	0	1	0	1	0
chr1_243339063_chr1_243339064_+-	chr1	243339063	chr1	243339064	155	INS	2	1	1	0	0	0
chr1_243979656_chr1_243979661_+-	chr1	243979656	chr1	243979661	715	INS	2	1	1	0	0	0
chr1_245855925_chr1_245999103_+-	chr1	245855925	chr1	245999103	-143188	DEL	24	0	0	0	1	1
chr1_245991885_chr1_245992219_++	chr1	245991885	chr1	245992219	-334	DEL	2	1	1	0	0	0
chr1_248803514_chr1_248803515_+-	chr1	248803514	chr1	248803515	178	INS	2	1	1	0	0	0
chr10_735450_chr10_735787_+-	chr10	735450	chr10	735787	-380	DEL	2	1	1	0	0	0
chr10_777780_chr10_777871_++	chr10	777780	chr10	777871	-94	DEL	2	1	1	0	0	0
chr10_784447_chr10_784510_++	chr10	784447	chr10	784510	-62	DEL	2	1	1	0	0	0
chr10_1011429_chr10_1011429_+-	chr10	1011429	chr10	1011429	64	INS	2	1	1	0	0	0
chr10_1373877_chr10_1373890_+-	chr10	1373877	chr10	1373890	166	INS	2	1	1	0	0	0
chr10_1617242_chr10_1617243_+-	chr10	1617242	chr10	1617243	93	INS	2	1	1	0	0	0
chr10_1700299_chr10_1700509_++	chr10	1700299	chr10	1700509	-210	DEL	2	1	1	0	0	0
chr10_1700427_chr10_1700519_+-	chr10	1700427	chr10	1700519	-89	DEL	2	1	1	0	0	0
chr10_1700952_chr10_1701025_+-	chr10	1700952	chr10	1701025	-80	DEL	3	1	1	0	0	0
chr10_1701187_chr10_1701440_+-	chr10	1701187	chr10	1701440	-246	DEL	4	1	1	0	0	0
chr10_3060916_chr10_3061234_+-	chr10	3060916	chr10	3061234	-252	DEL	3	1	1	0	0	0
chr10_3085757_chr10_3085758_+-	chr10	3085757	chr10	3085758	120	INS	2	1	1	0	0	0
chr10_3746257_chr10_3746382_+-	chr10	3746257	chr10	3746382	-124	DEL	26	1	1	0	1	0
chr10_4117389_chr10_4117390_+-	chr10	4117389	chr10	4117390	159	INS	2	1	1	0	0	0
chr10_4834359_chr10_5133665_-+	chr10	4834359	chr10	5133665	299307	DUP	56	1	1	0	1	1
chr10_5335731_chr10_5335731_+-	chr10	5335731	chr10	5335731	58	INS	3	1	1	0	0	0
chr10_7358414_chr10_7358472_++	chr10	7358414	chr10	7358472	-60	DEL	5	1	1	0	1	0
chr10_11284444_chr10_11284445_+-	chr10	11284444	chr10	11284445	186	INS	2	1	1	0	0	0
chr10_11366731_chr10_11366844_++	chr10	11366731	chr10	11366844	-111	DEL	2	1	1	0	0	0
chr10_11682575_chr10_11682659_++	chr10	11682575	chr10	11682659	71	INV	2	1	1	0	0	0
chr10_12623292_chr10_12623293_+-	chr10	12623292	chr10	12623293	70	INS	2	1	1	0	0	0
chr10_14097965_chr10_14097966_+-	chr10	14097965	chr10	14097966	65	INS	2	1	1	0	0	0
chr10_16949817_chr10_17048109_-+	chr10	16949817	chr10	17048109	98295	DUP	42	0	0	0	1	1
chr10_20296620_chr10_21612465_-+	chr10	20296620	chr10	21612465	1315852	DUP	53	1	1	0	1	1
chr10_24656749_chr10_24656852_+-	chr10	24656749	chr10	24656852	-103	DEL	2	1	1	0	0	0
chr10_26294490_chr10_26294756_+-	chr10	26294490	chr10	26294756	-266	DEL	37	1	1	0	1	0
chr10_26935573_chr10_26935574_+-	chr10	26935573	chr10	26935574	799	INS	2	1	1	0	0	0
chr10_26935698_chr10_26940379_-+	chr10	26935698	chr10	26940379	4681	DUP	2	1	1	0	0	0
chr10_31812459_chr17_67222706_++	chr10	31812459	chr17	67222706	0	TRA	55	1	1	0	1	1
chr10_31837970_chr10_31845777_-+	chr10	31837970	chr10	31845777	7807	DUP	36	1	1	0	1	0
chr10_32006244_chrX_83832854_++	chr10	32006244	chrX	83832854	0	TRA	53	1	1	0	1	1
chr10_38513363_chr10_38513370_+-	chr10	38513363	chr10	38513370	97	INS	2	1	1	0	0	0
chr10_39215552_chr10_39299796_++	chr10	39215552	chr10	39299796	86513	INV	2	1	1	0	0	0
chr10_39337842_chr10_39338573_+-	chr10	39337842	chr10	39338573	-733	DEL	2	1	1	0	0	0
chr10_39409427_chr10_39410567_+-	chr10	39409427	chr10	39410567	-1491	DEL	2	1	1	0	0	0
chr10_39527590_chr10_39527590_+-	chr10	39527590	chr10	39527590	844	INS	2	1	1	0	0	0
chr10_39559351_chr10_39559351_+-	chr10	39559351	chr10	39559351	341	INS	3	1	1	0	0	0
chr10_39572450_chr10_39572762_++	chr10	39572450	chr10	39572762	-311	DEL	3	1	1	0	0	0
chr10_39635037_chr10_39635037_+-	chr10	39635037	chr10	39635037	55	INS	2	1	1	0	0	0
chr10_41865579_chr10_41865699_+-	chr10	41865579	chr10	41865699	-160	DEL	2	1	1	0	0	0
chr10_41900795_chr10_41900849_+-	chr10	41900795	chr10	41900849	-55	DEL	2	1	1	0	0	0
chr10_42088038_chr10_42088157_+-	chr10	42088038	chr10	42088157	-139	DEL	2	1	1	0	0	0
chr10_42091995_chr10_42092457_+-	chr10	42091995	chr10	42092457	-464	DEL	2	1	1	0	0	0
chr10_42227736_chr10_42228111_++	chr10	42227736	chr10	42228111	-372	DEL	2	1	1	0	0	0
chr10_42528663_chr10_45086964_-+	chr10	42528663	chr10	45086964	2558303	DUP	52	1	0	0	1	1
chr10_43423146_chr10_43423146_+-	chr10	43423146	chr10	43423146	1822	INS	3	1	1	0	0	0
chr10_44663083_chr10_44663084_+-	chr10	44663083	chr10	44663084	59	INS	2	1	1	0	0	0
chr10_44898847_chr5_38248250_--	chr10	44898847	chr5	38248250	0	TRA	30	1	1	0	1	1
chr10_45086965_chr10_42528659_++	chr10	45086965	chr10	42528659	2558305	INV	10	1	0	0	0	1
chr10_45118877_chr10_45119085_+-	chr10	45118877	chr10	45119085	-208	DEL	37	1	1	0	1	0
chr10_50474040_chr10_50480337_-+	chr10	50474040	chr10	50480337	6297	DUP	35	0	1	0	1	0
chr10_52434188_chr10_52436223_+-	chr10	52434188	chr10	52436223	-2035	DEL	36	1	1	0	1	0
chr10_58818908_chr14_81723125_++	chr10	58818908	chr14	81723125	0	TRA	50	0	1	0	1	1
chr10_58824823_chr10_58824900_+-	chr10	58824823	chr10	58824900	-77	DEL	15	1	1	0	1	0
chr10_59882543_chr10_59882544_+-	chr10	59882543	chr10	59882544	289	INS	2	1	1	0	0	0
chr10_60469407_chr10_60469408_+-	chr10	60469407	chr10	60469408	677	INS	2	1	1	0	0	0
chr10_71689007_chr10_71689074_+-	chr10	71689007	chr10	71689074	680	INS	2	1	1	0	0	0
chr10_74810908_chr10_74816815_-+	chr10	74810908	chr10	74816815	5907	DUP	34	0	1	0	1	0
chr10_80533334_chr16_75469434_-+	chr10	80533334	chr16	75469434	0	TRA	3	1	1	0	0	0
chr10_80535593_chr16_75469418_+-	chr10	80535593	chr16	75469418	0	TRA	4	1	1	0	1	0
chr10_87773106_chr10_87887154_-+	chr10	87773106	chr10	87887154	114084	DUP	33	1	1	0	1	1
chr10_87954021_chr10_88010561_+-	chr10	87954021	chr10	88010561	-56535	DEL	47	0	0	0	1	1
chr10_97572267_chr10_97572456_+-	chr10	97572267	chr10	97572456	-189	DEL	36	1	1	0	1	0
chr10_99625152_chr10_99625152_+-	chr10	99625152	chr10	99625152	103	INS	3	1	1	0	0	0
chr10_101368023_chr7_4969064_-+	chr10	101368023	chr7	4969064	0	TRA	25	0	1	0	1	0
chr10_112926146_chr10_112926165_+-	chr10	112926146	chr10	112926165	393	INS	2	1	1	0	0	0
chr10_113951922_chr10_113968976_-+	chr10	113951922	chr10	113968976	17054	DUP	33	0	1	0	1	0
chr10_118860130_chr10_118906069_-+	chr10	118860130	chr10	118906069	45942	DUP	44	1	1	0	1	1
chr10_119313063_chr10_119313064_+-	chr10	119313063	chr10	119313064	74	INS	2	1	1	0	0	0
chr10_120045787_chr10_120053376_++	chr10	120045787	chr10	120053376	7586	INV	36	1	1	0	1	0
chr10_121584825_chr10_121584826_+-	chr10	121584825	chr10	121584826	82	INS	2	1	1	0	0	0
chr10_124230185_chr10_124230245_+-	chr10	124230185	chr10	124230245	-65	DEL	2	1	1	0	0	0
chr10_126824517_chr10_126921069_-+	chr10	126824517	chr10	126921069	96555	DUP	44	0	0	0	1	1
chr10_126952832_chr10_126952833_+-	chr10	126952832	chr10	126952833	156	INS	2	1	1	0	0	0
chr10_128077785_chr10_128081107_++	chr10	128077785	chr10	128081107	-3315	DEL	8	0	1	0	1	0
chr10_128219496_chr10_128219496_+-	chr10	128219496	chr10	128219496	153	INS	2	1	1	0	0	0
chr10_128799318_chr10_128799476_+-	chr10	128799318	chr10	128799476	-157	DEL	32	1	1	0	1	0
chr10_129979115_chr10_129979740_+-	chr10	129979115	chr10	129979740	-625	DEL	37	1	1	0	1	0
chr10_130051339_chr10_130051457_+-	chr10	130051339	chr10	130051457	-131	DEL	2	1	1	0	0	0
chr10_131665733_chr10_131665937_+-	chr10	131665733	chr10	131665937	-203	DEL	10	0	1	0	1	0
chr10_131807908_chr10_131807909_+-	chr10	131807908	chr10	131807909	140	INS	2	1	1	0	0	0
chr10_131823677_chr10_131823678_+-	chr10	131823677	chr10	131823678	116	INS	2	1	1	0	0	0
chr10_131824273_chr10_131824274_+-	chr10	131824273	chr10	131824274	83	INS	2	1	1	0	0	0
chr10_131884280_chr10_131884281_+-	chr10	131884280	chr10	131884281	203	INS	2	1	1	0	0	0
chr10_131952194_chr10_131952195_+-	chr10	131952194	chr10	131952195	517	INS	2	1	1	0	0	0
chr10_132267734_chr10_132267735_+-	chr10	132267734	chr10	132267735	82	INS	2	1	1	0	0	0
chr10_132358942_chr10_132359022_++	chr10	132358942	chr10	132359022	-84	DEL	2	1	1	0	0	0
chr10_132822739_chr10_132822740_+-	chr10	132822739	chr10	132822740	66	INS	3	1	1	0	0	0
chr10_132851862_chr10_132851863_+-	chr10	132851862	chr10	132851863	161	INS	2	1	1	0	0	0
chr10_133029977_chr10_133029991_+-	chr10	133029977	chr10	133029991	53	INS	3	1	1	0	0	0
chr10_133071351_chr10_133071439_+-	chr10	133071351	chr10	133071439	-81	DEL	2	1	1	0	0	0
chr10_133079501_chr10_133079691_++	chr10	133079501	chr10	133079691	-189	DEL	2	1	1	0	0	0
chr10_133111268_chr10_133111727_++	chr10	133111268	chr10	133111727	-480	DEL	3	1	1	0	0	0
chr10_133135551_chr10_133136360_++	chr10	133135551	chr10	133136360	-843	DEL	2	1	1	0	0	0
chr10_133151540_chr10_133151593_+-	chr10	133151540	chr10	133151593	-52	DEL	2	1	1	0	0	0
chr10_133164070_chr10_133164125_+-	chr10	133164070	chr10	133164125	-55	DEL	2	1	1	0	0	0
chr10_133317260_chr10_133317915_+-	chr10	133317260	chr10	133317915	-586	DEL	2	1	1	0	0	0
chr10_133333773_chr10_133333865_+-	chr10	133333773	chr10	133333865	203	INS	2	1	1	0	0	0
chr10_133477276_chr10_133477553_++	chr10	133477276	chr10	133477553	-278	DEL	2	1	1	0	0	0
chr10_133762495_chr10_133762566_++	chr10	133762495	chr10	133762566	-70	DEL	2	1	1	0	0	0
chr11_311836_chr11_317949_++	chr11	311836	chr11	317949	6114	INV	2	1	1	0	0	0
chr11_322215_chr11_322369_+-	chr11	322215	chr11	322369	-154	DEL	3	1	1	0	0	0
chr11_1405016_chr11_1405017_+-	chr11	1405016	chr11	1405017	53	INS	2	1	1	0	0	0
chr11_1550646_chr11_1550647_+-	chr11	1550646	chr11	1550647	59	INS	2	1	1	0	0	0
chr11_1550694_chr11_1550695_+-	chr11	1550694	chr11	1550695	194	INS	2	1	1	0	0	0
chr11_1664613_chr11_1664614_+-	chr11	1664613	chr11	1664614	260	INS	2	1	1	0	0	0
chr11_2161902_chr11_2161903_+-	chr11	2161902	chr11	2161903	126	INS	2	1	1	0	0	0
chr11_2418192_chr11_2418243_+-	chr11	2418192	chr11	2418243	-51	DEL	13	1	1	0	1	0
chr11_3096926_chr11_3096926_+-	chr11	3096926	chr11	3096926	1084	INS	2	1	1	0	0	0
chr11_6458498_chr11_6541229_+-	chr11	6458498	chr11	6541229	-82729	DEL	54	1	0	0	1	1
chr11_6541216_chr11_6458503_++	chr11	6541216	chr11	6458503	82728	INV	10	1	0	0	0	1
chr11_8498066_chrX_96505644_++	chr11	8498066	chrX	96505644	0	TRA	44	1	0	0	1	1
chr11_18945367_chr11_18945368_+-	chr11	18945367	chr11	18945368	83	INS	2	1	1	0	0	0
chr11_25215940_chr11_25215941_+-	chr11	25215940	chr11	25215941	278	INS	2	1	1	0	0	0
chr11_36128997_chr11_36323403_+-	chr11	36128997	chr11	36323403	-194404	DEL	55	1	0	0	1	1
chr11_37559853_chr11_37559854_+-	chr11	37559853	chr11	37559854	152	INS	3	1	1	0	0	0
chr11_44662917_chr11_44662929_+-	chr11	44662917	chr11	44662929	78	INS	3	1	1	0	0	0
chr11_46848122_chr11_46862265_-+	chr11	46848122	chr11	46862265	14142	DUP	36	1	1	0	1	0
chr11_48427863_chr11_48429384_+-	chr11	48427863	chr11	48429384	-1521	DEL	37	1	1	0	1	0
chr11_50758087_chr11_50758091_+-	chr11	50758087	chr11	50758091	2733	INS	3	1	1	0	0	0
chr11_54990683_chr11_54990949_+-	chr11	54990683	chr11	54990949	-265	DEL	33	1	1	0	1	0
chr11_57887405_chr1_121734759_--	chr11	57887405	chr1	121734759	0	TRA	26	1	0	0	1	1
chr11_57959636_chr11_57963092_-+	chr11	57959636	chr11	57963092	3456	DUP	36	1	1	0	1	0
chr11_58139929_chr11_58139929_+-	chr11	58139929	chr11	58139929	63	INS	3	1	1	0	0	0
chr11_60015342_chr11_60015570_+-	chr11	60015342	chr11	60015570	-228	DEL	35	1	1	0	1	0
chr11_60963344_chr11_60971208_-+	chr11	60963344	chr11	60971208	7863	DUP	36	1	1	0	1	0
chr11_61745962_chr11_61746383_+-	chr11	61745962	chr11	61746383	-421	DEL	37	1	1	0	1	0
chr11_62143056_chr11_62143057_+-	chr11	62143056	chr11	62143057	215	INS	2	1	1	0	0	0
chr11_62277899_chr11_62278017_++	chr11	62277899	chr11	62278017	-113	DEL	2	1	1	0	0	0
chr11_62547997_chr11_62716862_+-	chr11	62547997	chr11	62716862	-168861	DEL	56	1	1	0	1	1
chr11_65440714_chr11_65444882_-+	chr11	65440714	chr11	65444882	4168	DUP	33	1	1	0	1	0
chr11_67753189_chr11_67753192_+-	chr11	67753189	chr11	67753192	184	INS	2	1	1	0	0	0
chr11_69069451_chr11_69069452_+-	chr11	69069451	chr11	69069452	157	INS	2	1	1	0	0	0
chr11_69082668_chr11_69082725_+-	chr11	69082668	chr11	69082725	-60	DEL	3	1	1	0	0	0
chr11_69651477_chr11_69679557_-+	chr11	69651477	chr11	69679557	28079	DUP	36	1	1	0	1	0
chr11_70067810_chr11_70067872_+-	chr11	70067810	chr11	70067872	-62	DEL	14	1	1	0	1	0
chr11_70126965_chr11_70126966_+-	chr11	70126965	chr11	70126966	97	INS	2	1	1	0	0	0
chr11_70540270_chr22_22683177_++	chr11	70540270	chr22	22683177	0	TRA	56	1	1	0	1	1
chr11_72670795_chr11_72670800_+-	chr11	72670795	chr11	72670800	223	INS	2	1	1	0	0	0
chr11_76673288_chr11_76793067_-+	chr11	76673288	chr11	76793067	119776	DUP	41	0	0	0	1	1
chr11_79190900_chr11_79190988_+-	chr11	79190900	chr11	79190988	-84	DEL	2	1	1	0	0	0
chr11_88092346_chr11_88092445_+-	chr11	88092346	chr11	88092445	-77	DEL	2	1	1	0	0	0
chr11_95078754_chr11_95381403_-+	chr11	95078754	chr11	95381403	302626	DUP	5	0	0	0	1	1
chr11_95125341_chr11_95382437_-+	chr11	95125341	chr11	95382437	257096	DUP	6	0	0	0	1	1
chr11_101260527_chr11_101260538_+-	chr11	101260527	chr11	101260538	106	INS	3	1	1	0	0	0
chr11_103275714_chr11_103286253_-+	chr11	103275714	chr11	103286253	10540	DUP	36	1	1	0	1	0
chr11_104709811_chr11_104711411_+-	chr11	104709811	chr11	104711411	-1600	DEL	24	0	1	0	1	0
chr11_106407380_chr11_106420165_+-	chr11	106407380	chr11	106420165	-12784	DEL	37	1	1	0	1	0
chr11_110179037_chr11_110179102_++	chr11	110179037	chr11	110179102	-63	DEL	3	0	1	0	1	0
chr11_114917471_chr11_114930951_++	chr11	114917471	chr11	114930951	13478	INV	34	0	1	0	1	0
chr11_118096894_chr11_118096967_+-	chr11	118096894	chr11	118096967	-81	DEL	2	1	1	0	0	0
chr11_118331674_chr11_118331686_+-	chr11	118331674	chr11	118331686	125	INS	3	1	1	0	0	0
chr11_120076753_chr11_120076753_+-	chr11	120076753	chr11	120076753	54	INS	2	1	1	0	0	0
chr11_120328808_chr11_120328808_+-	chr11	120328808	chr11	120328808	936	INS	2	1	1	0	0	0
chr11_122460357_chr11_122460425_+-	chr11	122460357	chr11	122460425	-68	DEL	15	1	1	0	1	0
chr11_122989698_chr11_122989724_+-	chr11	122989698	chr11	122989724	1064	INS	4	1	1	0	0	0
chr11_123457119_chr11_123457122_+-	chr11	123457119	chr11	123457122	55	INS	3	1	1	0	0	0
chr11_126330683_chr11_126330804_-+	chr11	126330683	chr11	126330804	-121	DEL	26	1	1	0	1	0
chr11_133833090_chr11_133833090_+-	chr11	133833090	chr11	133833090	642	INS	3	1	1	0	0	0
chr11_134489421_chr11_134489616_++	chr11	134489421	chr11	134489616	-197	DEL	2	1	1	0	0	0
chr12_419504_chr12_419584_++	chr12	419504	chr12	419584	75	INV	2	1	1	0	0	0
chr12_453206_chr12_453207_+-	chr12	453206	chr12	453207	70	INS	2	1	1	0	0	0
chr12_544037_chr12_544038_+-	chr12	544037	chr12	544038	167	INS	2	1	1	0	0	0
chr12_1051999_chr12_1052000_+-	chr12	1051999	chr12	1052000	87	INS	2	1	1	0	0	0
chr12_1079310_chr12_1079546_+-	chr12	1079310	chr12	1079546	-233	DEL	2	1	1	0	0	0
chr12_1661189_chr12_1661352_+-	chr12	1661189	chr12	1661352	-164	DEL	2	1	1	0	0	0
chr12_6943885_chr5_139276243_--	chr12	6943885	chr5	139276243	0	TRA	44	1	1	0	1	1
chr12_7054449_chr12_7054884_+-	chr12	7054449	chr12	7054884	-435	DEL	34	1	0	0	1	0
chr12_7199888_chr12_7200026_+-	chr12	7199888	chr12	7200026	-142	DEL	3	1	1	0	0	0
chr12_7447069_chr12_7447421_+-	chr12	7447069	chr12	7447421	-352	DEL	34	1	1	0	1	0
chr12_7979747_chr12_7980290_+-	chr12	7979747	chr12	7980290	-541	DEL	2	1	1	0	0	0
chr12_9401056_chr12_31254994_++	chr12	9401056	chr12	31254994	21853900	INV	5	1	0	0	0	1
chr12_9430004_chr12_31254782_++	chr12	9430004	chr12	31254782	21827900	INV	2	0	0	1	0	1
chr12_11267458_chr12_11267590_++	chr12	11267458	chr12	11267590	-130	DEL	2	1	1	0	0	0
chr12_11926576_chr12_12116081_-+	chr12	11926576	chr12	12116081	189509	DUP	50	1	0	0	1	1
chr12_15513089_chr12_15513151_+-	chr12	15513089	chr12	15513151	-59	DEL	2	1	1	0	0	0
chr12_17454416_chr12_17454919_++	chr12	17454416	chr12	17454919	-503	DEL	2	1	1	0	0	0
chr12_20612473_chr7_48549337_++	chr12	20612473	chr7	48549337	0	TRA	3	0	0	0	1	1
chr12_22347826_chr16_32967821_+-	chr12	22347826	chr16	32967821	0	TRA	2	0	0	0	1	1
chr12_23766880_chr12_23775115_+-	chr12	23766880	chr12	23775115	-8234	DEL	35	1	1	0	1	0
chr12_23952554_chr13_37196470_++	chr12	23952554	chr13	37196470	0	TRA	57	1	1	0	1	1
chr12_24007340_chr12_24007406_+-	chr12	24007340	chr12	24007406	135	INS	2	1	1	0	0	0
chr12_26581844_chr4_24786834_++	chr12	26581844	chr4	24786834	0	TRA	37	1	0	0	1	1
chr12_26775932_chr12_26775933_+-	chr12	26775932	chr12	26775933	98	INS	3	1	1	0	0	0
chr12_28758577_chr12_28758578_+-	chr12	28758577	chr12	28758578	52	INS	2	1	1	0	0	0
chr12_29541616_chr12_29579702_+-	chr12	29541616	chr12	29579702	-38081	DEL	50	1	1	0	1	1
chr12_30126131_chr12_30126183_+-	chr12	30126131	chr12	30126183	-52	DEL	15	1	1	0	1	0
chr12_32160300_chr12_32171872_+-	chr12	32160300	chr12	32171872	-11581	DEL	36	1	0	0	1	0
chr12_37371690_chr12_37374062_+-	chr12	37371690	chr12	37374062	-2372	DEL	23	1	0	0	1	0
chr12_38845720_chr12_38846198_+-	chr12	38845720	chr12	38846198	-477	DEL	36	1	1	0	1	0
chr12_45454315_chr12_45454373_+-	chr12	45454315	chr12	45454373	-57	DEL	4	1	1	0	0	0
chr12_46155885_chr12_46155886_+-	chr12	46155885	chr12	46155886	364	INS	2	1	1	0	0	0
chr12_47941280_chr12_47941281_+-	chr12	47941280	chr12	47941281	390	INS	2	1	1	0	0	0
chr12_48332487_chr12_48332618_++	chr12	48332487	chr12	48332618	-123	DEL	2	1	1	0	0	0
chr12_52973881_chr12_52973941_+-	chr12	52973881	chr12	52973941	-58	DEL	2	1	1	0	0	0
chr12_54296485_chr12_54316595_-+	chr12	54296485	chr12	54316595	20111	DUP	35	1	1	0	1	0
chr12_57375543_chr12_57383774_-+	chr12	57375543	chr12	57383774	8231	DUP	36	1	1	0	1	0
chr12_59440458_chr12_59440511_+-	chr12	59440458	chr12	59440511	-56	DEL	2	1	1	0	0	0
chr12_63162050_chr12_63162066_+-	chr12	63162050	chr12	63162066	193	INS	3	1	1	0	0	0
chr12_63717146_chr2_163712524_-+	chr12	63717146	chr2	163712524	0	TRA	37	0	1	0	1	1
chr12_63717146_chr2_163731839_-+	chr12	63717146	chr2	163731839	0	TRA	34	0	0	0	1	1
chr12_65425026_chr12_65425026_+-	chr12	65425026	chr12	65425026	679	INS	3	1	1	0	0	0
chr12_67243668_chr12_67269899_+-	chr12	67243668	chr12	67269899	-26231	DEL	41	1	1	0	1	1
chr12_70007995_chr12_70008049_+-	chr12	70007995	chr12	70008049	-54	DEL	15	1	1	0	1	0
chr12_71546195_chr12_71547883_++	chr12	71546195	chr12	71547883	1618	INV	2	1	1	0	0	0
chr12_75354827_chr12_75354929_+-	chr12	75354827	chr12	75354929	-103	DEL	26	1	1	0	1	0
chr12_75810924_chr12_75904401_++	chr12	75810924	chr12	75904401	93445	INV	7	0	0	0	1	1
chr12_76684833_chr12_76696533_-+	chr12	76684833	chr12	76696533	11700	DUP	36	1	1	0	1	0
chr12_78626139_chr12_78626141_+-	chr12	78626139	chr12	78626141	59	INS	2	1	1	0	0	0
chr12_78860513_chr12_78862884_-+	chr12	78860513	chr12	78862884	2370	DUP	36	1	1	0	1	0
chr12_82900993_chr12_82900994_+-	chr12	82900993	chr12	82900994	244	INS	2	1	1	0	0	0
chr12_90223571_chr12_90223571_+-	chr12	90223571	chr12	90223571	543	INS	3	1	1	0	0	0
chr12_90479465_chr12_90479465_+-	chr12	90479465	chr12	90479465	77	INS	2	1	1	0	0	0
chr12_90641462_chr12_90641464_+-	chr12	90641462	chr12	90641464	89	INS	2	1	1	0	0	0
chr12_96360655_chr12_96365940_-+	chr12	96360655	chr12	96365940	5284	DUP	35	1	1	0	1	0
chr12_101545023_chr12_101583930_-+	chr12	101545023	chr12	101583930	38912	DUP	43	1	0	0	1	1
chr12_103988763_chr12_125316618_++	chr12	103988763	chr12	125316618	21327878	INV	2	0	1	0	0	1
chr12_105679173_chr12_105679173_+-	chr12	105679173	chr12	105679173	968	INS	3	1	1	0	0	0
chr12_108300628_chr12_108300695_+-	chr12	108300628	chr12	108300695	-67	DEL	3	1	0	0	1	0
chr12_109868113_chr12_109868114_+-	chr12	109868113	chr12	109868114	231	INS	2	1	1	0	0	0
chr12_113450687_chr12_113451384_++	chr12	113450687	chr12	113451384	-761	DEL	2	1	1	0	0	0
chr12_114013140_chr12_114013175_+-	chr12	114013140	chr12	114013175	453	INS	2	1	1	0	0	0
chr12_120852871_chr12_120852871_+-	chr12	120852871	chr12	120852871	62	INS	3	1	1	0	0	0
chr12_121747742_chr12_121747743_+-	chr12	121747742	chr12	121747743	168	INS	2	1	1	0	0	0
chr12_124302787_chr12_124302788_+-	chr12	124302787	chr12	124302788	70	INS	2	1	1	0	0	0
chr12_127068188_chr12_127068190_+-	chr12	127068188	chr12	127068190	108	INS	2	1	1	0	0	0
chr12_128241404_chr12_128241720_+-	chr12	128241404	chr12	128241720	-315	DEL	2	1	1	0	0	0
chr12_130641484_chr12_130641485_+-	chr12	130641484	chr12	130641485	204	INS	2	1	1	0	0	0
chr12_131330035_chr12_131330271_-+	chr12	131330035	chr12	131330271	232	DUP	2	0	1	0	1	0
chr12_131435491_chr12_131435492_+-	chr12	131435491	chr12	131435492	220	INS	2	1	1	0	0	0
chr12_131560088_chr12_131560141_+-	chr12	131560088	chr12	131560141	-56	DEL	4	1	1	0	0	0
chr12_131654676_chr12_131654676_+-	chr12	131654676	chr12	131654676	630	INS	3	1	1	0	0	0
chr12_132155857_chr12_132156873_+-	chr12	132155857	chr12	132156873	-1243	DEL	3	1	0	0	1	0
chr12_132759121_chr12_132759212_+-	chr12	132759121	chr12	132759212	-87	DEL	4	1	1	0	0	0
chr12_132776521_chr12_132776608_+-	chr12	132776521	chr12	132776608	-82	DEL	3	1	1	0	0	0
chr13_19138035_chr13_19138036_+-	chr13	19138035	chr13	19138036	268	INS	2	1	1	0	0	0
chr13_19138077_chr13_19138077_+-	chr13	19138077	chr13	19138077	705	INS	3	1	1	0	0	0
chr13_19409716_chr13_19410551_++	chr13	19409716	chr13	19410551	-834	DEL	3	0	1	0	1	0
chr13_21377194_chr13_21377195_+-	chr13	21377194	chr13	21377195	1353	INS	2	1	1	0	0	0
chr13_21743341_chr13_21743449_+-	chr13	21743341	chr13	21743449	-108	DEL	2	1	1	0	0	0
chr13_21853431_chr13_21853432_+-	chr13	21853431	chr13	21853432	265	INS	2	1	1	0	0	0
chr13_30022383_chr13_30022708_+-	chr13	30022383	chr13	30022708	-324	DEL	33	1	1	0	1	0
chr13_32306302_chr13_36427228_-+	chr13	32306302	chr13	36427228	4120933	DUP	57	1	1	0	1	1
chr13_32405326_chr13_32405384_+-	chr13	32405326	chr13	32405384	-58	DEL	5	0	1	0	1	0
chr13_34024272_chr13_34024368_+-	chr13	34024272	chr13	34024368	-95	DEL	13	1	1	0	1	0
chr13_34819902_chr13_34820085_+-	chr13	34819902	chr13	34820085	-183	DEL	34	1	1	0	1	0
chr13_36427229_chr13_32306298_++	chr13	36427229	chr13	32306298	4120930	INV	11	1	0	0	0	1
chr13_37196471_chr12_23952553_--	chr13	37196471	chr12	23952553	0	TRA	44	1	0	0	1	1
chr13_37364416_chr13_37364647_-+	chr13	37364416	chr13	37364647	-228	DEL	5	0	1	0	1	0
chr13_38988445_chr13_38988446_+-	chr13	38988445	chr13	38988446	110	INS	2	1	1	0	0	0
chr13_40022115_chr13_40022195_+-	chr13	40022115	chr13	40022195	-80	DEL	15	1	1	0	1	0
chr13_45968952_chr13_45973405_-+	chr13	45968952	chr13	45973405	4453	DUP	36	1	1	0	1	0
chr13_49540123_chr13_49540177_+-	chr13	49540123	chr13	49540177	-54	DEL	14	1	1	0	1	0
chr13_51161128_chr13_51161128_+-	chr13	51161128	chr13	51161128	2633	INS	2	1	1	0	0	0
chr13_51418335_chr13_51418388_+-	chr13	51418335	chr13	51418388	-53	DEL	15	1	1	0	1	0
chr13_52688329_chr13_60966095_+-	chr13	52688329	chr13	60966095	-8277643	DEL	56	1	0	1	1	1
chr13_62019607_chr13_62019608_+-	chr13	62019607	chr13	62019608	302	INS	2	1	1	0	0	0
chr13_66528884_chr13_66558877_+-	chr13	66528884	chr13	66558877	-29992	DEL	22	0	1	0	1	1
chr13_66528885_chr13_66559139_+-	chr13	66528885	chr13	66559139	-30113	DEL	2	0	0	0	1	1
chr13_81911142_chr13_81911152_+-	chr13	81911142	chr13	81911152	56	INS	2	1	1	0	0	0
chr13_85351001_chr13_85351002_+-	chr13	85351001	chr13	85351002	58	INS	2	1	1	0	0	0
chr13_91343705_chr13_91343899_+-	chr13	91343705	chr13	91343899	-192	DEL	36	1	1	0	1	0
chr13_98378951_chr13_98379059_+-	chr13	98378951	chr13	98379059	-108	DEL	2	1	1	0	0	0
chr13_100019590_chr13_100019750_+-	chr13	100019590	chr13	100019750	-160	DEL	33	1	1	0	1	0
chr13_101401964_chr13_101517541_-+	chr13	101401964	chr13	101517541	115556	DUP	17	0	0	0	1	1
chr13_105519057_chr13_105519057_+-	chr13	105519057	chr13	105519057	389	INS	3	1	1	0	0	0
chr13_106814178_chr13_106814241_+-	chr13	106814178	chr13	106814241	-60	DEL	3	1	1	0	0	0
chr13_109544121_chr13_109548686_-+	chr13	109544121	chr13	109548686	4565	DUP	36	1	1	0	1	0
chr13_110219858_chr13_110219869_+-	chr13	110219858	chr13	110219869	95	INS	3	1	1	0	0	0
chr13_111631635_chr13_111631635_+-	chr13	111631635	chr13	111631635	217	INS	4	1	1	0	0	0
chr13_112151122_chr13_112151122_+-	chr13	112151122	chr13	112151122	97	INS	2	1	1	0	0	0
chr13_112298560_chr13_112298627_+-	chr13	112298560	chr13	112298627	-66	DEL	3	1	1	0	0	0
chr13_112893827_chr13_112893827_+-	chr13	112893827	chr13	112893827	58	INS	4	1	1	0	0	0
chr13_112967937_chr13_112967938_+-	chr13	112967937	chr13	112967938	117	INS	2	1	1	0	0	0
chr13_113346030_chr13_113346031_+-	chr13	113346030	chr13	113346031	92	INS	2	1	1	0	0	0
chr13_113375678_chr13_113375739_+-	chr13	113375678	chr13	113375739	-61	DEL	3	1	1	0	0	0
chr13_113725438_chr13_113725568_++	chr13	113725438	chr13	113725568	-118	DEL	2	1	1	0	0	0
chr13_114049399_chr13_114073562_-+	chr13	114049399	chr13	114073562	24103	DUP	33	1	1	0	1	0
chr14_19488260_chr22_15627033_++	chr14	19488260	chr22	15627033	0	TRA	3	1	1	0	0	0
chr14_19670265_chr14_19670265_+-	chr14	19670265	chr14	19670265	56	INS	2	1	1	0	0	0
chr14_19963492_chr14_20022319_++	chr14	19963492	chr14	20022319	57889	INV	9	0	1	0	0	1
chr14_21894495_chr14_21899567_+-	chr14	21894495	chr14	21899567	-5073	DEL	37	1	1	0	1	0
chr14_23036367_chr14_23036569_+-	chr14	23036367	chr14	23036569	-197	DEL	2	1	1	0	0	0
chr14_23828570_chr14_23830098_+-	chr14	23828570	chr14	23830098	-1527	DEL	37	1	1	0	1	0
chr14_24305556_chr14_24305691_-+	chr14	24305556	chr14	24305691	-134	DEL	20	0	1	0	1	0
chr14_24380286_chr14_58867756_++	chr14	24380286	chr14	58867756	34487467	INV	47	1	1	1	1	1
chr14_27295204_chr14_27295259_+-	chr14	27295204	chr14	27295259	-55	DEL	15	1	1	0	1	0
chr14_28297555_chr14_28297610_+-	chr14	28297555	chr14	28297610	-55	DEL	14	1	1	0	1	0
chr14_28445344_chr14_28553480_-+	chr14	28445344	chr14	28553480	108004	DUP	8	0	0	0	1	1
chr14_30510948_chr14_30512095_+-	chr14	30510948	chr14	30512095	-1147	DEL	28	1	1	0	1	0
chr14_31563513_chr14_31563781_+-	chr14	31563513	chr14	31563781	-268	DEL	35	1	1	0	1	0
chr14_34752016_chr14_34752415_+-	chr14	34752016	chr14	34752415	-398	DEL	35	1	0	0	1	0
chr14_34929650_chr14_34929739_++	chr14	34929650	chr14	34929739	-88	DEL	2	1	1	0	0	0
chr14_35007661_chr14_35007662_+-	chr14	35007661	chr14	35007662	54	INS	2	1	1	0	0	0
chr14_36140984_chr14_45765420_+-	chr14	36140984	chr14	45765420	-9624335	DEL	56	1	1	1	1	1
chr14_45765420_chr14_36141005_++	chr14	45765420	chr14	36141005	9624427	INV	9	1	0	0	0	1
chr14_48933720_chr14_48933721_+-	chr14	48933720	chr14	48933721	109	INS	2	1	1	0	0	0
chr14_56255549_chr14_56255626_+-	chr14	56255549	chr14	56255626	-78	DEL	2	0	1	0	1	0
chr14_61611827_chr14_61617430_-+	chr14	61611827	chr14	61617430	5603	DUP	35	1	1	0	1	0
chr14_61801242_chr14_61802109_+-	chr14	61801242	chr14	61802109	-894	DEL	16	0	1	0	1	0
chr14_64371538_chr14_64382237_-+	chr14	64371538	chr14	64382237	10699	DUP	36	1	1	0	1	0
chr14_67942275_chr14_68032914_-+	chr14	67942275	chr14	68032914	90644	DUP	46	1	1	0	1	1
chr14_68222387_chr14_68246454_-+	chr14	68222387	chr14	68246454	24067	DUP	21	0	1	0	1	0
chr14_68950579_chr14_68954761_+-	chr14	68950579	chr14	68954761	-4180	DEL	38	1	1	0	1	0
chr14_69539839_chr14_60327695_++	chr14	69539839	chr14	60327695	9212145	INV	20	1	0	0	1	1
chr14_74938084_chr16_10073953_++	chr14	74938084	chr16	10073953	0	TRA	56	1	1	0	1	1
chr14_75299476_chr14_75299560_+-	chr14	75299476	chr14	75299560	-84	DEL	14	1	1	0	1	0
chr14_79257520_chr14_79257521_+-	chr14	79257520	chr14	79257521	1748	INS	2	1	1	0	0	0
chr14_80759175_chr14_80769944_-+	chr14	80759175	chr14	80769944	10768	DUP	35	0	1	0	1	0
chr14_81723125_chr10_58818909_-+	chr14	81723125	chr10	58818909	0	TRA	24	0	0	0	1	1
chr14_83055324_chr15_101267703_++	chr14	83055324	chr15	101267703	0	TRA	44	1	1	0	1	1
chr14_83062499_chr15_101256215_+-	chr14	83062499	chr15	101256215	0	TRA	33	1	0	0	1	1
chr14_84596305_chr14_84596310_+-	chr14	84596305	chr14	84596310	123	INS	2	1	1	0	0	0
chr14_85461270_chr14_89728272_-+	chr14	85461270	chr14	89728272	4266997	DUP	37	0	0	0	1	1
chr14_86136909_chr14_86136976_+-	chr14	86136909	chr14	86136976	-67	DEL	14	1	1	0	1	0
chr14_91643971_chr14_91654678_+-	chr14	91643971	chr14	91654678	10679	DUP	17	1	1	0	1	0
chr14_92179205_chr14_92179316_+-	chr14	92179205	chr14	92179316	-143	DEL	2	1	1	0	0	0
chr14_92251019_chr14_92251028_+-	chr14	92251019	chr14	92251028	63	INS	2	1	1	0	0	0
chr14_93576987_chr14_93577040_+-	chr14	93576987	chr14	93577040	-52	DEL	2	1	1	0	0	0
chr14_93722245_chr14_93722347_++	chr14	93722245	chr14	93722347	-138	DEL	2	1	1	0	0	0
chr14_94519909_chr14_94519910_+-	chr14	94519909	chr14	94519910	482	INS	2	1	1	0	0	0
chr14_95423504_chr14_95423504_+-	chr14	95423504	chr14	95423504	134	INS	4	1	1	0	0	0
chr14_96338656_chr15_91389764_++	chr14	96338656	chr15	91389764	0	TRA	44	1	1	0	1	1
chr14_96367003_chr15_91385148_++	chr14	96367003	chr15	91385148	0	TRA	48	1	1	0	1	1
chr14_96799702_chr14_96815732_+-	chr14	96799702	chr14	96815732	-16029	DEL	37	1	1	0	1	0
chr14_98420095_chr14_98421378_+-	chr14	98420095	chr14	98421378	-1282	DEL	36	1	1	0	1	0
chr14_99615484_chr14_99615556_+-	chr14	99615484	chr14	99615556	-72	DEL	10	0	1	0	1	0
chr14_101233138_chr14_101245590_+-	chr14	101233138	chr14	101245590	-12457	DEL	33	0	1	0	1	0
chr14_102069372_chr14_102080658_-+	chr14	102069372	chr14	102080658	11286	DUP	36	1	1	0	1	0
chr14_102676670_chr14_102676730_+-	chr14	102676670	chr14	102676730	-73	DEL	2	1	1	0	0	0
chr14_102876887_chr14_102876958_+-	chr14	102876887	chr14	102876958	-71	DEL	4	1	1	0	0	0
chr14_103109223_chr14_103109407_++	chr14	103109223	chr14	103109407	-165	DEL	2	1	1	0	0	0
chr14_104208655_chr14_104208660_+-	chr14	104208655	chr14	104208660	70	INS	2	1	1	0	0	0
chr14_104681640_chr14_104689471_-+	chr14	104681640	chr14	104689471	7831	DUP	36	0	1	0	1	0
chr14_105075238_chr14_105077936_-+	chr14	105075238	chr14	105077936	-2696	DEL	36	1	1	0	1	0
chr14_105442796_chr14_105442796_+-	chr14	105442796	chr14	105442796	142	INS	3	1	1	0	0	0
chr14_105628058_chr14_105628340_-+	chr14	105628058	chr14	105628340	262	DUP	2	1	0	0	1	0
chr14_105688520_chr14_105688772_++	chr14	105688520	chr14	105688772	-252	DEL	2	1	1	0	0	0
chr14_105744746_chr14_105744747_+-	chr14	105744746	chr14	105744747	71	INS	2	1	1	0	0	0
chr14_105867420_chr14_105867721_+-	chr14	105867420	chr14	105867721	-313	DEL	4	1	1	0	0	0
chr14_105949273_chr14_105949273_+-	chr14	105949273	chr14	105949273	90	INS	4	1	1	0	0	0
chr14_105952446_chr14_105952455_+-	chr14	105952446	chr14	105952455	107	INS	3	1	0	0	1	0
chr14_105999581_chr14_105999581_+-	chr14	105999581	chr14	105999581	58	INS	3	1	1	0	0	0
chr14_106000216_chr14_106000293_+-	chr14	106000216	chr14	106000293	-78	DEL	3	1	1	0	0	0
chr14_106014667_chr14_106014978_+-	chr14	106014667	chr14	106014978	-312	DEL	4	1	1	0	0	0
chr14_106018358_chr14_106027051_+-	chr14	106018358	chr14	106027051	-9088	DEL	4	1	1	0	0	0
chr14_106028092_chr14_106028174_+-	chr14	106028092	chr14	106028174	-82	DEL	4	1	1	0	0	0
chr14_106061881_chr14_106116368_-+	chr14	106061881	chr14	106116368	-54483	DEL	10	0	0	0	1	1
chr15_20340833_chr15_20340833_+-	chr15	20340833	chr15	20340833	239	INS	3	1	1	0	0	0
chr15_21263403_chr15_21265523_-+	chr15	21263403	chr15	21265523	-2120	DEL	25	1	1	0	1	0
chr15_21339425_chr15_21339484_+-	chr15	21339425	chr15	21339484	-57	DEL	2	1	1	0	0	0
chr15_22223598_chr15_22223932_++	chr15	22223598	chr15	22223932	-335	DEL	2	1	1	0	0	0
chr15_25528120_chr15_25528120_+-	chr15	25528120	chr15	25528120	173	INS	2	1	1	0	0	0
chr15_29306647_chr15_29306757_+-	chr15	29306647	chr15	29306757	-111	DEL	10	0	1	0	1	0
chr15_30121203_chr15_30121597_-+	chr15	30121203	chr15	30121597	-394	DEL	11	1	1	0	1	0
chr15_30623252_chr15_30660794_+-	chr15	30623252	chr15	30660794	-37540	DEL	42	1	0	0	1	1
chr15_31423122_chr15_31423122_+-	chr15	31423122	chr15	31423122	77	INS	2	1	1	0	0	0
chr15_36872648_chr15_36878491_++	chr15	36872648	chr15	36878491	5843	INV	34	0	1	0	1	0
chr15_36878164_chr15_36890190_++	chr15	36878164	chr15	36890190	12026	INV	36	1	1	0	1	0
chr15_41031550_chr15_41031602_+-	chr15	41031550	chr15	41031602	417	INS	2	1	1	0	0	0
chr15_45263879_chr15_45264014_-+	chr15	45263879	chr15	45264014	-136	DEL	14	0	1	0	1	0
chr15_53639480_chr15_53639481_+-	chr15	53639480	chr15	53639481	55	INS	2	1	1	0	0	0
chr15_55611372_chr18_58733200_++	chr15	55611372	chr18	58733200	0	TRA	55	1	1	0	1	1
chr15_56110582_chr15_56111006_++	chr15	56110582	chr15	56111006	-400	DEL	2	1	1	0	0	0
chr15_57688196_chr15_57688394_+-	chr15	57688196	chr15	57688394	-237	DEL	3	1	1	0	0	0
chr15_58982256_chr15_58982257_+-	chr15	58982256	chr15	58982257	68	INS	2	1	1	0	0	0
chr15_59282909_chr15_59282938_+-	chr15	59282909	chr15	59282938	75	INS	3	1	1	0	0	0
chr15_64562177_chr15_64562244_+-	chr15	64562177	chr15	64562244	-67	DEL	15	1	1	0	1	0
chr15_65146002_chr15_65146095_++	chr15	65146002	chr15	65146095	-86	DEL	2	1	1	0	0	0
chr15_65150921_chr15_65150980_+-	chr15	65150921	chr15	65150980	-59	DEL	15	1	1	0	1	0
chr15_66652308_chr15_66652378_+-	chr15	66652308	chr15	66652378	-70	DEL	13	1	1	0	1	0
chr15_68088252_chr15_68088347_+-	chr15	68088252	chr15	68088347	-95	DEL	4	0	1	0	1	0
chr15_68888825_chr15_68892927_-+	chr15	68888825	chr15	68892927	4101	DUP	36	1	1	0	1	0
chr15_69300649_chr15_69300760_++	chr15	69300649	chr15	69300760	-116	DEL	2	1	1	0	0	0
chr15_69365417_chr15_69374260_-+	chr15	69365417	chr15	69374260	8842	DUP	27	0	1	0	1	0
chr15_70479704_chr15_70479793_++	chr15	70479704	chr15	70479793	-91	DEL	2	1	1	0	0	0
chr15_71050543_chr15_71054987_-+	chr15	71050543	chr15	71054987	4443	DUP	35	0	1	0	1	0
chr15_71314305_chr15_71342218_-+	chr15	71314305	chr15	71342218	27912	DUP	36	1	1	0	1	0
chr15_72536221_chr15_72536274_+-	chr15	72536221	chr15	72536274	-53	DEL	14	1	1	0	1	0
chr15_72756214_chr16_50008921_++	chr15	72756214	chr16	50008921	0	TRA	12	0	1	0	1	1
chr15_72769752_chr16_49997296_++	chr15	72769752	chr16	49997296	0	TRA	27	0	1	0	1	1
chr15_74957393_chr17_39141556_++	chr15	74957393	chr17	39141556	0	TRA	18	0	1	0	1	1
chr15_75123269_chr15_75123270_+-	chr15	75123269	chr15	75123270	53	INS	2	1	1	0	0	0
chr15_77014902_chr15_77021617_-+	chr15	77014902	chr15	77021617	6714	DUP	35	1	1	0	1	0
chr15_77668578_chr16_19164419_++	chr15	77668578	chr16	19164419	0	TRA	56	1	1	0	1	1
chr15_80804703_chr15_80804776_+-	chr15	80804703	chr15	80804776	-73	DEL	15	1	1	0	1	0
chr15_80912000_chr15_80912001_+-	chr15	80912000	chr15	80912001	103	INS	2	1	1	0	0	0
chr15_87860957_chr15_87873173_+-	chr15	87860957	chr15	87873173	-12216	DEL	22	0	1	0	1	0
chr15_89577550_chr15_89577635_+-	chr15	89577550	chr15	89577635	-85	DEL	15	1	1	0	1	0
chr15_90647366_chr15_90647367_+-	chr15	90647366	chr15	90647367	313	INS	2	1	1	0	0	0
chr15_91389765_chr14_96338656_+-	chr15	91389765	chr14	96338656	0	TRA	26	1	0	0	1	1
chr15_93118476_chr15_93118529_+-	chr15	93118476	chr15	93118529	-54	DEL	2	0	1	0	1	0
chr15_96823354_chr15_96823355_+-	chr15	96823354	chr15	96823355	75	INS	2	1	1	0	0	0
chr15_97088526_chr15_97088773_+-	chr15	97088526	chr15	97088773	-243	DEL	2	1	1	0	0	0
chr15_97764820_chr15_97769613_-+	chr15	97764820	chr15	97769613	4793	DUP	36	1	1	0	1	0
chr15_99799783_chr15_99799793_+-	chr15	99799783	chr15	99799793	155	INS	2	1	1	0	0	0
chr15_101155742_chr15_101155944_+-	chr15	101155742	chr15	101155944	-201	DEL	13	1	1	0	1	0
chr15_101267705_chr14_83055324_+-	chr15	101267705	chr14	83055324	0	TRA	27	1	0	0	1	1
chr15_101976696_chr8_54936116_++	chr15	101976696	chr8	54936116	0	TRA	4	0	1	0	1	0
chr16_160727_chr16_160728_+-	chr16	160727	chr16	160728	127	INS	2	1	1	0	0	0
chr16_406844_chr16_406901_++	chr16	406844	chr16	406901	-56	DEL	2	1	1	0	0	0
chr16_553081_chr16_553081_+-	chr16	553081	chr16	553081	60	INS	2	1	1	0	0	0
chr16_847148_chr16_847178_+-	chr16	847148	chr16	847178	155	INS	2	1	1	0	0	0
chr16_917299_chr16_917389_+-	chr16	917299	chr16	917389	-88	DEL	2	1	1	0	0	0
chr16_1043297_chr16_1043330_+-	chr16	1043297	chr16	1043330	169	INS	2	1	1	0	0	0
chr16_1599325_chr16_1599326_+-	chr16	1599325	chr16	1599326	256	INS	2	1	1	0	0	0
chr16_1888781_chr16_1888781_+-	chr16	1888781	chr16	1888781	1254	INS	4	1	1	0	0	0
chr16_8129089_chr16_8129149_+-	chr16	8129089	chr16	8129149	-60	DEL	15	1	1	0	1	0
chr16_10073953_chr14_74938084_--	chr16	10073953	chr14	74938084	0	TRA	41	1	0	0	1	1
chr16_10293507_chr16_10293609_+-	chr16	10293507	chr16	10293609	-102	DEL	13	1	1	0	1	0
chr16_10519592_chr16_10519592_+-	chr16	10519592	chr16	10519592	141	INS	3	1	0	0	1	0
chr16_11222073_chr16_11222130_+-	chr16	11222073	chr16	11222130	-57	DEL	13	1	1	0	1	0
chr16_13385680_chr16_13385680_+-	chr16	13385680	chr16	13385680	198	INS	2	1	1	0	0	0
chr16_14984897_chr16_14985189_+-	chr16	14984897	chr16	14985189	-292	DEL	23	1	1	0	1	0
chr16_17868507_chr16_17868508_+-	chr16	17868507	chr16	17868508	124	INS	2	1	1	0	0	0
chr16_19164419_chr15_77668578_-+	chr16	19164419	chr15	77668578	0	TRA	36	1	0	0	1	1
chr16_21321729_chr16_21326483_++	chr16	21321729	chr16	21326483	-4297	DEL	31	1	1	0	1	0
chr16_21931656_chr17_82684968_-+	chr16	21931656	chr17	82684968	0	TRA	22	1	1	0	1	1
chr16_23377596_chr16_23377596_+-	chr16	23377596	chr16	23377596	114	INS	3	1	1	0	0	0
chr16_23775991_chr16_23775991_+-	chr16	23775991	chr16	23775991	1493	INS	2	1	1	0	0	0
chr16_24575795_chr16_24575979_++	chr16	24575795	chr16	24575979	153	INV	2	1	1	0	0	0
chr16_26172099_chr16_26172099_+-	chr16	26172099	chr16	26172099	4369	INS	4	1	1	0	0	0
chr16_27842111_chr16_27842112_+-	chr16	27842111	chr16	27842112	68	INS	2	1	1	0	0	0
chr16_27888441_chr16_27888507_+-	chr16	27888441	chr16	27888507	-70	DEL	2	1	1	0	0	0
chr16_28231192_chr16_28237221_-+	chr16	28231192	chr16	28237221	6029	DUP	35	0	1	0	1	0
chr16_29226833_chr16_29227250_--	chr16	29226833	chr16	29227250	-407	DEL	2	1	1	0	0	0
chr16_29549927_chr16_29583142_++	chr16	29549927	chr16	29583142	33217	INV	3	0	1	0	1	0
chr16_29852000_chr16_29852193_+-	chr16	29852000	chr16	29852193	-191	DEL	17	1	1	0	1	0
chr16_30225561_chr16_30225618_++	chr16	30225561	chr16	30225618	-57	DEL	2	1	1	0	0	0
chr16_31169643_chr16_31169697_++	chr16	31169643	chr16	31169697	-53	DEL	2	1	1	0	0	0
chr16_33058961_chr16_33059055_+-	chr16	33058961	chr16	33059055	-87	DEL	2	1	1	0	0	0
chr16_34066322_chr16_34066322_+-	chr16	34066322	chr16	34066322	5388	INS	2	1	1	0	0	0
chr16_34284930_chr16_34284930_+-	chr16	34284930	chr16	34284930	332	INS	3	1	1	0	0	0
chr16_34571760_chr16_34584770_+-	chr16	34571760	chr16	34584770	12547	BND	2	1	0	0	1	0
chr16_34572228_chr16_34589462_++	chr16	34572228	chr16	34589462	17935	INV	2	1	0	0	1	0
chr16_34572246_chr16_34586256_-+	chr16	34572246	chr16	34586256	14623	BND	2	1	0	0	1	0
chr16_34572634_chr16_34581930_-+	chr16	34572634	chr16	34581930	8606	DUP	2	1	0	0	1	0
chr16_34572759_chr16_46388852_+-	chr16	34572759	chr16	46388852	11820666	BND	18	1	0	0	1	0
chr16_34573972_chr16_46393431_+-	chr16	34573972	chr16	46393431	11821603	DUP	23	1	0	0	1	0
chr16_34574247_chr16_34592900_++	chr16	34574247	chr16	34592900	18627	INV	2	1	0	0	1	0
chr16_34576300_chr16_34592751_++	chr16	34576300	chr16	34592751	16941	INV	2	1	0	0	1	0
chr16_34576423_chr16_46388944_-+	chr16	34576423	chr16	46388944	11808192	DUP	24	1	1	0	1	0
chr16_34576802_chr16_46382553_++	chr16	34576802	chr16	46382553	11811860	INV	8	1	1	0	1	0
chr16_34576803_chr16_34580966_+-	chr16	34576803	chr16	34580966	-4502	DEL	3	1	1	0	1	0
chr16_34580970_chr16_34589093_--	chr16	34580970	chr16	34589093	8117	INV	2	1	1	0	0	0
chr16_34581527_chr16_34588187_+-	chr16	34581527	chr16	34588187	6769	BND	2	1	0	0	1	0
chr16_34581591_chr16_34592882_++	chr16	34581591	chr16	34592882	12042	INV	4	1	0	0	1	0
chr16_34581737_chr16_34595184_++	chr16	34581737	chr16	34595184	13648	INV	3	1	0	0	1	0
chr16_34582005_chr16_34585612_-+	chr16	34582005	chr16	34585612	3676	DUP	7	1	0	0	1	0
chr16_34582122_chr16_34593571_++	chr16	34582122	chr16	34593571	11301	INV	6	1	0	0	1	0
chr16_34582259_chr16_34582877_+-	chr16	34582259	chr16	34582877	-578	DEL	4	1	0	0	1	0
chr16_34582460_chr16_34584669_+-	chr16	34582460	chr16	34584669	-1911	DEL	3	1	0	0	1	0
chr16_34582782_chr16_34588483_+-	chr16	34582782	chr16	34588483	5249	BND	2	1	0	0	1	0
chr16_34582897_chr16_34589451_--	chr16	34582897	chr16	34589451	6539	INV	4	1	0	0	1	0
chr16_34583573_chr16_34595821_++	chr16	34583573	chr16	34595821	12139	INV	2	1	0	0	1	0
chr16_34584664_chr16_34586913_+-	chr16	34584664	chr16	34586913	-2936	DEL	2	1	0	0	1	0
chr16_34584772_chr16_34592863_++	chr16	34584772	chr16	34592863	8896	INV	3	1	0	0	1	0
chr16_34585626_chr16_34593403_++	chr16	34585626	chr16	34593403	7030	INV	12	1	0	0	1	0
chr16_34587043_chr16_34594424_++	chr16	34587043	chr16	34594424	5711	INV	5	1	0	0	1	0
chr16_34588776_chr16_34595474_++	chr16	34588776	chr16	34595474	7342	INV	7	1	0	0	1	0
chr16_34591881_chr16_46383925_+-	chr16	34591881	chr16	46383925	11790435	INV	3	1	0	0	1	0
chr16_34592219_chr16_46401024_++	chr16	34592219	chr16	46401024	11804131	INV	20	1	0	0	1	0
chr16_34592756_chr16_34594605_-+	chr16	34592756	chr16	34594605	1597	DUP	3	1	0	0	1	0
chr16_34592874_chr16_34593253_+-	chr16	34592874	chr16	34593253	-404	DEL	2	1	1	0	0	0
chr16_34594598_chr16_34596173_++	chr16	34594598	chr16	34596173	1515	INV	2	1	0	0	1	0
chr17_356492_chr17_356493_+-	chr17	356492	chr17	356493	117	INS	2	1	1	0	0	0
chr17_722450_chr17_722451_+-	chr17	722450	chr17	722451	97	INS	2	1	1	0	0	0
chr17_893792_chr17_893903_++	chr17	893792	chr17	893903	-112	DEL	3	1	1	0	0	0
chr17_941605_chr17_941777_++	chr17	941605	chr17	941777	-153	DEL	3	1	1	0	0	0
chr17_952341_chr17_952342_+-	chr17	952341	chr17	952342	159	INS	2	1	1	0	0	0
chr17_1153810_chr17_1153815_+-	chr17	1153810	chr17	1153815	178	INS	3	1	1	0	0	0
chr17_3788790_chr17_3788800_+-	chr17	3788790	chr17	3788800	80	INS	2	1	1	0	0	0
chr17_4596011_chr17_4596089_+-	chr17	4596011	chr17	4596089	-79	DEL	2	1	1	0	0	0
chr17_6951517_chr17_6951619_+-	chr17	6951517	chr17	6951619	-102	DEL	18	1	0	0	1	0
chr17_7199330_chr17_7199404_++	chr17	7199330	chr17	7199404	-74	DEL	3	0	1	0	1	0
chr17_8910608_chr17_8912178_+-	chr17	8910608	chr17	8912178	-1570	DEL	35	1	1	0	1	0
chr17_11578924_chr17_11578928_+-	chr17	11578924	chr17	11578928	112	INS	3	1	1	0	0	0
chr17_19616530_chr17_19616534_+-	chr17	19616530	chr17	19616534	68	INS	2	1	1	0	0	0
chr17_20532801_chr17_20532802_+-	chr17	20532801	chr17	20532802	93	INS	2	1	1	0	0	0
chr17_26939614_chr17_26940892_+-	chr17	26939614	chr17	26940892	-1279	DEL	2	1	1	0	0	0
chr17_30359433_chr17_30359592_++	chr17	30359433	chr17	30359592	-157	DEL	2	1	1	0	0	0
chr17_31335292_chr17_31335292_+-	chr17	31335292	chr17	31335292	114	INS	2	1	1	0	0	0
chr17_33464463_chr17_33464526_+-	chr17	33464463	chr17	33464526	-69	DEL	3	1	1	0	0	0
chr17_36866965_chr17_36867038_++	chr17	36866965	chr17	36867038	-72	DEL	5	1	1	0	1	0
chr17_38631489_chr17_38631489_+-	chr17	38631489	chr17	38631489	76	INS	2	1	1	0	0	0
chr17_41581105_chr17_41590667_-+	chr17	41581105	chr17	41590667	9562	DUP	36	1	1	0	1	0
chr17_43071100_chr8_128763819_--	chr17	43071100	chr8	128763819	0	TRA	14	0	0	0	1	1
chr17_43084082_chr6_33389625_++	chr17	43084082	chr6	33389625	0	TRA	12	0	0	0	1	1
chr17_43109108_chr6_33402489_++	chr17	43109108	chr6	33402489	0	TRA	11	0	0	0	1	1
chr17_43358963_chr17_43365252_++	chr17	43358963	chr17	43365252	6166	INV	2	1	1	0	0	0
chr17_44219639_chr17_44219904_+-	chr17	44219639	chr17	44219904	-264	DEL	20	1	1	0	1	0
chr17_48655043_chr17_48655097_+-	chr17	48655043	chr17	48655097	-54	DEL	15	1	1	0	1	0
chr17_51081866_chr17_51086153_-+	chr17	51081866	chr17	51086153	4287	DUP	38	0	1	0	1	0
chr17_53354628_chr17_53357189_+-	chr17	53354628	chr17	53357189	-2562	DEL	2	0	1	0	1	0
chr17_57170188_chr17_57173067_-+	chr17	57170188	chr17	57173067	2878	DUP	35	0	1	0	1	0
chr17_67222707_chr10_31812458_--	chr17	67222707	chr10	31812458	0	TRA	41	1	0	0	1	1
chr17_69612145_chr17_69612145_+-	chr17	69612145	chr17	69612145	336	INS	2	1	1	0	0	0
chr17_72043268_chr17_72051947_-+	chr17	72043268	chr17	72051947	8678	DUP	36	1	1	0	1	0
chr17_72264860_chr17_72270866_+-	chr17	72264860	chr17	72270866	-6006	DEL	37	1	1	0	1	0
chr17_72716464_chrX_11302380_++	chr17	72716464	chrX	11302380	0	TRA	51	1	1	0	1	1
chr17_72948298_chr17_72948298_+-	chr17	72948298	chr17	72948298	136	INS	3	1	1	0	0	0
chr17_75194798_chr17_75194798_+-	chr17	75194798	chr17	75194798	424	INS	3	1	1	0	0	0
chr17_76127610_chr17_76127673_+-	chr17	76127610	chr17	76127673	-63	DEL	12	1	1	0	1	0
chr17_76189596_chr17_76202952_-+	chr17	76189596	chr17	76202952	13356	DUP	36	1	1	0	1	0
chr17_76212495_chr17_76223408_+-	chr17	76212495	chr17	76223408	-10912	DEL	36	1	1	0	1	0
chr17_76576212_chr17_76576848_+-	chr17	76576212	chr17	76576848	-636	DEL	37	1	1	0	1	0
chr17_77335964_chr17_77336020_+-	chr17	77335964	chr17	77336020	-57	DEL	2	1	1	0	0	0
chr17_77561244_chr17_77561665_++	chr17	77561244	chr17	77561665	-422	DEL	2	1	1	0	0	0
chr17_77562576_chr17_77562632_+-	chr17	77562576	chr17	77562632	-55	DEL	3	1	1	0	0	0
chr17_79554433_chr17_79554433_+-	chr17	79554433	chr17	79554433	309	INS	2	1	1	0	0	0
chr17_79701490_chr17_79701550_+-	chr17	79701490	chr17	79701550	-60	DEL	2	1	1	0	0	0
chr17_79971713_chr2_44870639_-+	chr17	79971713	chr2	44870639	0	TRA	22	0	1	0	1	0
chr17_80024463_chr17_80024463_+-	chr17	80024463	chr17	80024463	616	INS	4	1	1	0	0	0
chr17_80184677_chr17_80184732_++	chr17	80184677	chr17	80184732	-58	DEL	2	1	1	0	0	0
chr17_80184798_chr17_80184859_++	chr17	80184798	chr17	80184859	-59	DEL	2	1	1	0	0	0
chr17_80489806_chr17_80489964_+-	chr17	80489806	chr17	80489964	-141	DEL	2	1	1	0	0	0
chr17_80811842_chr17_80811899_+-	chr17	80811842	chr17	80811899	-56	DEL	3	1	1	0	0	0
chr17_81209890_chr17_81210064_+-	chr17	81209890	chr17	81210064	-176	DEL	2	1	1	0	0	0
chr17_81535349_chr17_81535349_+-	chr17	81535349	chr17	81535349	155	INS	3	1	1	0	0	0
chr17_82097413_chr17_82097465_+-	chr17	82097413	chr17	82097465	-52	DEL	13	1	1	0	1	0
chr17_82684826_chr16_21931688_++	chr17	82684826	chr16	21931688	0	TRA	12	1	0	0	1	1
chr17_83055279_chr17_83055489_++	chr17	83055279	chr17	83055489	-262	DEL	2	1	1	0	0	0
chr18_837110_chr18_837423_+-	chr18	837110	chr18	837423	-312	DEL	2	1	1	0	0	0
chr18_1629504_chr18_1629505_+-	chr18	1629504	chr18	1629505	385	INS	2	1	1	0	0	0
chr18_2490536_chr18_2560353_-+	chr18	2490536	chr18	2560353	69818	DUP	45	1	1	0	1	1
chr18_4031309_chr18_4031474_+-	chr18	4031309	chr18	4031474	-165	DEL	37	1	1	0	1	0
chr18_4265517_chr18_4265518_+-	chr18	4265517	chr18	4265518	78	INS	2	1	1	0	0	0
chr18_8516149_chr18_8516150_+-	chr18	8516149	chr18	8516150	60	INS	2	1	1	0	0	0
chr18_8803743_chr18_8819307_+-	chr18	8803743	chr18	8819307	-15564	DEL	36	1	1	0	1	0
chr18_10409160_chr18_10417368_-+	chr18	10409160	chr18	10417368	8208	DUP	36	1	1	0	1	0
chr18_11457824_chr18_11458564_++	chr18	11457824	chr18	11458564	740	INV	45	1	1	0	1	0
chr18_11613740_chr18_11613854_++	chr18	11613740	chr18	11613854	-117	DEL	3	1	1	0	0	0
chr18_12145098_chr18_12146284_++	chr18	12145098	chr18	12146284	1299	INV	2	1	1	0	0	0
chr18_13823285_chr18_13823286_+-	chr18	13823285	chr18	13823286	105	INS	2	1	1	0	0	0
chr18_14297472_chr18_14297474_+-	chr18	14297472	chr18	14297474	59	INS	3	1	1	0	0	0
chr18_14689132_chr18_14689261_++	chr18	14689132	chr18	14689261	-130	DEL	2	1	1	0	0	0
chr18_15402570_chr18_15402741_+-	chr18	15402570	chr18	15402741	-171	DEL	5	1	0	0	1	0
chr18_23040022_chr18_23040079_++	chr18	23040022	chr18	23040079	-58	DEL	2	1	1	0	0	0
chr18_23306305_chr18_23306389_+-	chr18	23306305	chr18	23306389	-84	DEL	14	1	1	0	1	0
chr18_24938783_chr18_24938837_+-	chr18	24938783	chr18	24938837	-53	DEL	3	1	1	0	0	0
chr18_28297172_chr18_28302966_-+	chr18	28297172	chr18	28302966	5793	DUP	23	0	1	0	1	0
chr18_31357503_chr18_35350680_++	chr18	31357503	chr18	35350680	3991546	INV	32	0	1	0	1	1
chr18_37780492_chr18_37780504_+-	chr18	37780492	chr18	37780504	642	INS	3	1	1	0	0	0
chr18_38586968_chr18_38587027_+-	chr18	38586968	chr18	38587027	-59	DEL	5	0	1	0	1	0
chr18_44721955_chr18_44721956_+-	chr18	44721955	chr18	44721956	103	INS	2	1	1	0	0	0
chr18_47401314_chr18_47401445_++	chr18	47401314	chr18	47401445	-128	DEL	2	1	1	0	0	0
chr18_48905541_chr18_48946391_-+	chr18	48905541	chr18	48946391	40852	DUP	43	1	0	0	1	1
chr18_49735187_chr18_49736747_+-	chr18	49735187	chr18	49736747	-1560	DEL	36	1	1	0	1	0
chr18_51799521_chr18_51807913_-+	chr18	51799521	chr18	51807913	8392	DUP	36	1	1	0	1	0
chr18_52272129_chr18_52272194_++	chr18	52272129	chr18	52272194	-68	DEL	2	1	1	0	0	0
chr18_53629643_chr18_53629800_++	chr18	53629643	chr18	53629800	153	INV	35	0	1	0	1	0
chr18_53633360_chr18_11568241_++	chr18	53633360	chr18	11568241	42063818	INV	18	0	0	0	1	1
chr18_56793818_chr18_56793818_+-	chr18	56793818	chr18	56793818	178	INS	4	1	1	0	0	0
chr18_57024579_chr18_57024580_+-	chr18	57024579	chr18	57024580	68	INS	2	1	1	0	0	0
chr18_57509940_chr18_57510568_+-	chr18	57509940	chr18	57510568	-632	DEL	2	1	1	0	0	0
chr18_57745435_chr2_114130513_+-	chr18	57745435	chr2	114130513	0	TRA	54	1	1	0	1	1
chr18_57996910_chr18_58011733_-+	chr18	57996910	chr18	58011733	14823	DUP	36	1	1	0	1	0
chr18_58550514_chr18_58550515_+-	chr18	58550514	chr18	58550515	400	INS	2	1	1	0	0	0
chr18_58733200_chr15_55611372_+-	chr18	58733200	chr15	55611372	0	TRA	31	1	0	0	1	1
chr18_63088624_chr18_63088741_-+	chr18	63088624	chr18	63088741	-117	DEL	14	1	0	0	1	0
chr18_68920575_chr18_68920575_+-	chr18	68920575	chr18	68920575	203	INS	4	1	1	0	0	0
chr18_76508485_chr18_76508487_+-	chr18	76508485	chr18	76508487	151	INS	2	1	1	0	0	0
chr18_76939084_chr6_62925120_-+	chr18	76939084	chr6	62925120	0	TRA	29	1	0	0	1	1
chr18_78800483_chr18_78800509_+-	chr18	78800483	chr18	78800509	238	INS	2	1	1	0	0	0
chr18_78917053_chr18_78917054_+-	chr18	78917053	chr18	78917054	59	INS	2	1	1	0	0	0
chr18_79043510_chr18_79043550_+-	chr18	79043510	chr18	79043550	607	INS	2	1	1	0	0	0
chr18_79357608_chr18_79357719_+-	chr18	79357608	chr18	79357719	-111	DEL	2	1	1	0	0	0
chr19_107967_chr19_108139_+-	chr19	107967	chr19	108139	-172	DEL	8	0	1	0	1	0
chr19_361380_chr19_361699_+-	chr19	361380	chr19	361699	-338	DEL	3	1	1	0	0	0
chr19_604859_chr19_604860_+-	chr19	604859	chr19	604860	133	INS	2	1	1	0	0	0
chr19_829262_chr19_829280_+-	chr19	829262	chr19	829280	95	INS	2	1	1	0	0	0
chr19_3173636_chr19_3173748_+-	chr19	3173636	chr19	3173748	-114	DEL	2	1	1	0	0	0
chr19_5212626_chr19_5215814_+-	chr19	5212626	chr19	5215814	3189	DUP	20	0	1	0	1	0
chr19_8085987_chr19_8085988_+-	chr19	8085987	chr19	8085988	74	INS	2	1	1	0	0	0
chr19_10758431_chr19_10758447_+-	chr19	10758431	chr19	10758447	335	INS	2	1	1	0	0	0
chr19_11983340_chr6_8742219_-+	chr19	11983340	chr6	8742219	0	TRA	44	1	1	0	1	1
chr19_13535933_chr19_13535934_+-	chr19	13535933	chr19	13535934	195	INS	2	1	1	0	0	0
chr19_14377333_chr19_14377400_+-	chr19	14377333	chr19	14377400	-67	DEL	2	1	1	0	0	0
chr19_15285913_chr19_15315520_+-	chr19	15285913	chr19	15315520	-29607	DEL	48	1	1	0	1	1
chr19_15950591_chr19_15950689_+-	chr19	15950591	chr19	15950689	-98	DEL	2	1	1	0	0	0
chr19_16588496_chr19_16592906_-+	chr19	16588496	chr19	16592906	4409	DUP	36	1	1	0	1	0
chr19_17315304_chr19_17315355_++	chr19	17315304	chr19	17315355	-65	DEL	2	1	1	0	0	0
chr19_17385426_chr7_152448658_--	chr19	17385426	chr7	152448658	0	TRA	50	1	1	0	1	1
chr19_18561974_chr19_18580730_-+	chr19	18561974	chr19	18580730	18757	DUP	36	1	1	0	1	0
chr19_22107219_chr19_22107397_++	chr19	22107219	chr19	22107397	-181	DEL	2	1	1	0	0	0
chr19_24429940_chr19_24429940_+-	chr19	24429940	chr19	24429940	168	INS	3	1	1	0	0	0
chr19_28142473_chr19_28142529_+-	chr19	28142473	chr19	28142529	-56	DEL	11	1	1	0	1	0
chr19_28630136_chr19_28630225_+-	chr19	28630136	chr19	28630225	-89	DEL	15	1	1	0	1	0
chr19_30008877_chr19_30024642_-+	chr19	30008877	chr19	30024642	15766	DUP	35	0	1	0	1	0
chr19_31625463_chr19_31625595_+-	chr19	31625463	chr19	31625595	-132	DEL	21	1	1	0	1	0
chr19_31865178_chr19_31865409_-+	chr19	31865178	chr19	31865409	-234	DEL	5	0	1	0	1	0
chr19_37881029_chr19_37881029_+-	chr19	37881029	chr19	37881029	447	INS	2	1	1	0	0	0
chr19_41361796_chr19_41362028_+-	chr19	41361796	chr19	41362028	-271	DEL	3	1	1	0	0	0
chr19_42669273_chr19_42672724_+-	chr19	42669273	chr19	42672724	-3469	DEL	15	1	1	0	1	0
chr19_48761597_chr19_48797176_++	chr19	48761597	chr19	48797176	35553	INV	20	0	0	0	1	1
chr19_48786073_chr20_44506529_++	chr19	48786073	chr20	44506529	0	TRA	13	0	0	0	1	1
chr19_49025459_chr19_49876981_+-	chr19	49025459	chr19	49876981	-851556	DEL	16	1	0	0	1	1
chr19_49414700_chr19_49414761_+-	chr19	49414700	chr19	49414761	-60	DEL	2	1	1	0	0	0
chr19_49702076_chr19_49702082_+-	chr19	49702076	chr19	49702082	130	INS	4	1	1	0	0	0
chr19_50913952_chr19_50914403_+-	chr19	50913952	chr19	50914403	-446	DEL	3	1	1	0	0	0
chr19_51180886_chr19_51180953_+-	chr19	51180886	chr19	51180953	-66	DEL	2	1	1	0	0	0
chr19_51276289_chr19_51276354_+-	chr19	51276289	chr19	51276354	-65	DEL	15	1	1	0	1	0
chr19_54181993_chr19_54181994_+-	chr19	54181993	chr19	54181994	152	INS	2	1	1	0	0	0
chr19_54297013_chr19_54577180_++	chr19	54297013	chr19	54577180	280165	BND	9	1	0	0	0	1
chr19_55418840_chr19_55418841_+-	chr19	55418840	chr19	55418841	65	INS	2	1	1	0	0	0
chr19_55472257_chr19_55472340_+-	chr19	55472257	chr19	55472340	-82	DEL	2	1	1	0	0	0
chr19_55713252_chr19_55735621_-+	chr19	55713252	chr19	55735621	22369	DUP	35	0	1	0	1	0
chr19_56688442_chr19_56688498_++	chr19	56688442	chr19	56688498	-55	DEL	2	1	1	0	0	0
chr19_57137940_chr19_57138008_++	chr19	57137940	chr19	57138008	-66	DEL	2	1	1	0	0	0
chr19_57169001_chr19_57169421_++	chr19	57169001	chr19	57169421	-419	DEL	3	1	1	0	0	0
chr19_57237327_chr19_57237385_+-	chr19	57237327	chr19	57237385	-58	DEL	15	1	1	0	1	0
chr19_57319270_chr19_57319271_+-	chr19	57319270	chr19	57319271	125	INS	2	1	1	0	0	0
chr19_57499424_chr19_57499491_+-	chr19	57499424	chr19	57499491	-66	DEL	2	1	1	0	0	0
chr2_307138_chr2_308335_++	chr2	307138	chr2	308335	-1170	DEL	3	1	1	0	0	0
chr2_308682_chr2_308924_++	chr2	308682	chr2	308924	-296	DEL	2	1	1	0	0	0
chr2_912965_chr2_913336_++	chr2	912965	chr2	913336	-372	DEL	2	1	1	0	0	0
chr2_965317_chr2_965317_+-	chr2	965317	chr2	965317	306	INS	2	1	1	0	0	0
chr2_1056768_chr2_1056769_+-	chr2	1056768	chr2	1056769	139	INS	2	1	1	0	0	0
chr2_1094163_chr2_1094233_+-	chr2	1094163	chr2	1094233	-68	DEL	3	1	1	0	0	0
chr2_1222670_chr2_1222671_+-	chr2	1222670	chr2	1222671	206	INS	2	1	1	0	0	0
chr2_1619319_chr2_1619404_++	chr2	1619319	chr2	1619404	-81	DEL	2	1	1	0	0	0
chr2_1619505_chr2_1619585_+-	chr2	1619505	chr2	1619585	-82	DEL	3	1	1	0	0	0
chr2_1707276_chr2_1707407_+-	chr2	1707276	chr2	1707407	-131	DEL	3	1	1	0	0	0
chr2_2520098_chr2_2520098_+-	chr2	2520098	chr2	2520098	102	INS	2	1	1	0	0	0
chr2_2837493_chr2_2837494_+-	chr2	2837493	chr2	2837494	352	INS	3	0	1	0	1	0
chr2_2906834_chr2_2907200_++	chr2	2906834	chr2	2907200	-366	DEL	2	1	1	0	0	0
chr2_3640876_chr2_3640877_+-	chr2	3640876	chr2	3640877	59	INS	2	1	1	0	0	0
chr2_9305460_chr2_9305532_+-	chr2	9305460	chr2	9305532	186	INS	2	1	1	0	0	0
chr2_9998447_chr2_9998481_+-	chr2	9998447	chr2	9998481	112	INS	3	1	1	0	0	0
chr2_10174572_chr22_37668162_++	chr2	10174572	chr22	37668162	0	TRA	50	1	1	0	1	1
chr2_10195686_chr9_128966650_++	chr2	10195686	chr9	128966650	0	TRA	39	1	0	0	1	1
chr2_10536190_chr2_10536191_+-	chr2	10536190	chr2	10536191	139	INS	2	1	1	0	0	0
chr2_17317827_chr2_17317897_+-	chr2	17317827	chr2	17317897	-70	DEL	15	1	1	0	1	0
chr2_19396094_chr2_19401761_+-	chr2	19396094	chr2	19401761	-5667	DEL	36	1	1	0	1	0
chr2_25394761_chr2_25394996_+-	chr2	25394761	chr2	25394996	-235	DEL	35	1	1	0	1	0
chr2_25649656_chr2_25712754_-+	chr2	25649656	chr2	25712754	63127	DUP	41	1	1	0	1	1
chr2_25898507_chr2_25906911_-+	chr2	25898507	chr2	25906911	8405	DUP	36	1	1	0	1	0
chr2_27539792_chr2_27539793_+-	chr2	27539792	chr2	27539793	170	INS	2	1	1	0	0	0
chr2_29005588_chr2_29005655_+-	chr2	29005588	chr2	29005655	-68	DEL	3	1	1	0	0	0
chr2_29802383_chr2_29802523_+-	chr2	29802383	chr2	29802523	-139	DEL	2	1	1	0	0	0
chr2_30740642_chr2_30740695_+-	chr2	30740642	chr2	30740695	-53	DEL	15	1	1	0	1	0
chr2_32005853_chr3_184041629_++	chr2	32005853	chr3	184041629	0	TRA	46	1	0	0	1	1
chr2_32554570_chr2_32572792_-+	chr2	32554570	chr2	32572792	18223	DUP	36	1	1	0	1	0
chr2_41040023_chr2_41040090_+-	chr2	41040023	chr2	41040090	-67	DEL	14	1	1	0	1	0
chr2_41565487_chr2_41691122_-+	chr2	41565487	chr2	41691122	125680	DUP	3	0	0	0	1	1
chr2_42548878_chr2_42548879_+-	chr2	42548878	chr2	42548879	95	INS	2	1	1	0	0	0
chr2_43120709_chr2_43120791_+-	chr2	43120709	chr2	43120791	-82	DEL	5	0	1	0	1	0
chr2_43298063_chr2_43298063_+-	chr2	43298063	chr2	43298063	329	INS	2	1	1	0	0	0
chr2_44588686_chr2_44588687_+-	chr2	44588686	chr2	44588687	121	INS	2	1	1	0	0	0
chr2_44870534_chr2_44942472_++	chr2	44870534	chr2	44942472	71938	INV	31	0	1	0	1	0
chr2_44870639_chr17_79971715_++	chr2	44870639	chr17	79971715	0	TRA	30	0	1	0	1	0
chr2_44942469_chr17_79971710_++	chr2	44942469	chr17	79971710	0	TRA	14	0	1	0	1	1
chr2_45051601_chr2_45058007_-+	chr2	45051601	chr2	45058007	6406	DUP	35	1	1	0	1	0
chr2_46833160_chr2_46841557_-+	chr2	46833160	chr2	46841557	8398	DUP	36	1	1	0	1	0
chr2_47242287_chr2_47249958_-+	chr2	47242287	chr2	47249958	7670	DUP	35	0	1	0	1	0
chr2_47956082_chr2_47956083_+-	chr2	47956082	chr2	47956083	131	INS	2	1	1	0	0	0
chr2_53850692_chr2_53850769_++	chr2	53850692	chr2	53850769	-76	DEL	3	0	1	0	1	0
chr2_54034010_chr2_54086006_-+	chr2	54034010	chr2	54086006	51990	DUP	26	0	1	0	1	1
chr2_62412322_chr2_62412410_+-	chr2	62412322	chr2	62412410	-82	DEL	2	1	1	0	0	0
chr2_63600701_chrX_63402359_++	chr2	63600701	chrX	63402359	0	TRA	50	1	1	0	1	1
chr2_66762993_chr2_66763015_+-	chr2	66762993	chr2	66763015	135	INS	4	1	1	0	0	0
chr2_73500266_chr2_73532022_-+	chr2	73500266	chr2	73532022	31757	DUP	34	0	0	0	1	1
chr2_74032462_chr2_74032463_+-	chr2	74032462	chr2	74032463	57	INS	2	1	1	0	0	0
chr2_75293472_chr2_75297545_-+	chr2	75293472	chr2	75297545	4072	DUP	36	1	1	0	1	0
chr2_80767292_chr2_80767359_+-	chr2	80767292	chr2	80767359	-65	DEL	3	1	1	0	0	0
chr2_84543717_chr2_85133189_-+	chr2	84543717	chr2	85133189	589478	DUP	54	1	1	0	1	1
chr2_84880593_chr7_112954603_++	chr2	84880593	chr7	112954603	0	TRA	53	1	1	0	1	1
chr2_85133199_chr2_84543700_++	chr2	85133199	chr2	84543700	589478	INV	9	1	0	0	0	1
chr2_86839591_chr2_86839719_-+	chr2	86839591	chr2	86839719	-129	DEL	24	1	1	0	1	0
chr2_87391742_chr2_87391743_+-	chr2	87391742	chr2	87391743	53	INS	2	1	1	0	0	0
chr2_89265288_chr2_89265288_+-	chr2	89265288	chr2	89265288	131	INS	3	1	1	0	0	0
chr2_90398301_chr2_90398301_+-	chr2	90398301	chr2	90398301	192	INS	2	1	1	0	0	0
chr2_91402872_chr2_91402936_+-	chr2	91402872	chr2	91402936	-64	DEL	2	1	1	0	0	0
chr2_91410717_chr2_91410717_+-	chr2	91410717	chr2	91410717	71	INS	2	1	1	0	0	0
chr2_91420424_chr2_91420490_++	chr2	91420424	chr2	91420490	-66	DEL	2	1	1	0	0	0
chr2_98626133_chr2_98626256_-+	chr2	98626133	chr2	98626256	-124	DEL	26	1	1	0	1	0
chr2_99407745_chr2_99415480_-+	chr2	99407745	chr2	99415480	7736	DUP	36	1	1	0	1	0
chr2_100643333_chr2_100643439_-+	chr2	100643333	chr2	100643439	-105	DEL	26	1	1	0	1	0
chr2_101092282_chr9_130960935_++	chr2	101092282	chr9	130960935	0	TRA	27	0	1	1	1	1
chr2_101944159_chr2_101944159_+-	chr2	101944159	chr2	101944159	3492	INS	3	1	1	0	0	0
chr2_102002766_chr2_102002767_+-	chr2	102002766	chr2	102002767	55	INS	2	1	1	0	0	0
chr2_102462847_chr2_162412478_+-	chr2	102462847	chr2	162412478	-59949516	DEL	52	1	1	1	1	1
chr2_111180365_chr2_111180435_+-	chr2	111180365	chr2	111180435	-70	DEL	15	1	1	0	1	0
chr2_113288492_chr2_196855257_+-	chr2	113288492	chr2	196855257	-83566605	DEL	40	0	1	1	1	1
chr2_114130513_chr18_57745435_++	chr2	114130513	chr18	57745435	0	TRA	47	1	1	1	1	1
chr2_114802722_chr2_114802919_-+	chr2	114802722	chr2	114802919	-198	DEL	13	0	1	0	1	0
chr2_117643580_chr2_117643580_+-	chr2	117643580	chr2	117643580	134	INS	2	1	1	0	0	0
chr2_117871825_chr2_117871826_+-	chr2	117871825	chr2	117871826	102	INS	2	1	1	0	0	0
chr2_118772970_chr2_118773037_+-	chr2	118772970	chr2	118773037	-67	DEL	6	1	1	0	1	0
chr2_119073361_chr2_119073361_+-	chr2	119073361	chr2	119073361	59	INS	2	1	1	0	0	0
chr2_120723806_chr2_120723807_+-	chr2	120723806	chr2	120723807	75	INS	2	1	1	0	0	0
chr2_121024546_chr2_121024659_+-	chr2	121024546	chr2	121024659	-113	DEL	4	1	1	0	0	0
chr2_121882131_chr2_121885005_+-	chr2	121882131	chr2	121885005	-2873	DEL	37	1	1	0	1	0
chr2_127119889_chr2_127119929_+-	chr2	127119889	chr2	127119929	152	INS	3	1	1	0	0	0
chr2_129623660_chr2_129623735_+-	chr2	129623660	chr2	129623735	-75	DEL	13	1	1	0	1	0
chr2_134016368_chr2_134022806_+-	chr2	134016368	chr2	134022806	-6438	DEL	36	1	1	0	1	0
chr2_134237638_chr2_134237701_+-	chr2	134237638	chr2	134237701	-64	DEL	3	1	1	0	0	0
chr2_139230074_chr2_139230134_+-	chr2	139230074	chr2	139230134	-60	DEL	3	1	1	0	0	0
chr2_141128482_chr2_141172723_+-	chr2	141128482	chr2	141172723	-44534	DEL	3	0	0	0	1	1
chr2_141300895_chr2_142117846_+-	chr2	141300895	chr2	142117846	-816960	DEL	29	0	0	0	1	1
chr2_154102295_chr2_154171289_-+	chr2	154102295	chr2	154171289	68995	DUP	38	0	0	0	1	1
chr2_158791914_chr2_158791993_+-	chr2	158791914	chr2	158791993	-73	DEL	2	1	1	0	0	0
chr2_159970486_chr2_160303660_-+	chr2	159970486	chr2	160303660	333175	DUP	55	1	1	0	1	1
chr2_161392127_chr2_161502654_+-	chr2	161392127	chr2	161502654	110469	DUP	19	1	1	0	1	1
chr2_162412467_chr2_102462857_++	chr2	162412467	chr2	102462857	59949620	INV	6	1	0	0	0	1
chr2_162753009_chr2_162753009_+-	chr2	162753009	chr2	162753009	109	INS	2	1	1	0	0	0
chr2_163121171_chr2_163124578_+-	chr2	163121171	chr2	163124578	-3407	DEL	37	1	1	0	1	0
chr2_163704822_chr12_63734305_-+	chr2	163704822	chr12	63734305	0	TRA	34	1	1	0	1	1
chr2_163712358_chr2_163731838_-+	chr2	163712358	chr2	163731838	19480	DUP	35	0	1	0	1	0
chr2_163712528_chr12_63717150_++	chr2	163712528	chr12	63717150	0	TRA	31	1	1	0	1	0
chr2_163731885_chr12_63717047_++	chr2	163731885	chr12	63717047	0	TRA	22	1	0	0	1	1
chr2_165927257_chr2_165927326_++	chr2	165927257	chr2	165927326	-68	DEL	2	1	1	0	0	0
chr2_167214230_chr2_167214231_+-	chr2	167214230	chr2	167214231	68	INS	3	1	1	0	0	0
chr2_170649167_chr2_170649303_++	chr2	170649167	chr2	170649303	-141	DEL	2	1	1	0	0	0
chr2_171059119_chr2_171059257_+-	chr2	171059119	chr2	171059257	-140	DEL	26	1	1	0	1	0
chr2_172181224_chr17_59790926_++	chr2	172181224	chr17	59790926	0	TRA	23	1	0	0	1	0
chr2_172208213_chr17_59867309_++	chr2	172208213	chr17	59867309	0	TRA	20	0	0	0	1	1
chr2_175237948_chr2_175237999_+-	chr2	175237948	chr2	175237999	-52	DEL	2	1	1	0	0	0
chr2_178643836_chr8_9087695_++	chr2	178643836	chr8	9087695	0	TRA	4	0	0	0	1	1
chr2_180308527_chr2_180308910_+-	chr2	180308527	chr2	180308910	-383	DEL	37	1	1	0	1	0
chr2_182058889_chr2_182059176_+-	chr2	182058889	chr2	182059176	-286	DEL	37	1	1	0	1	0
chr2_188114378_chr2_188114381_+-	chr2	188114378	chr2	188114381	108	INS	4	1	1	0	0	0
chr2_188711160_chr2_188711165_+-	chr2	188711160	chr2	188711165	88	INS	2	1	1	0	0	0
chr2_191368144_chr2_191372157_-+	chr2	191368144	chr2	191372157	4013	DUP	35	0	1	0	1	0
chr2_191567549_chr2_191567606_+-	chr2	191567549	chr2	191567606	-57	DEL	14	1	1	0	1	0
chr2_191798347_chr2_225248388_+-	chr2	191798347	chr2	225248388	-33449959	DEL	55	1	1	1	1	1
chr2_202906300_chr2_202906638_+-	chr2	202906300	chr2	202906638	-337	DEL	37	1	1	0	1	0
chr2_203442032_chr2_203448595_-+	chr2	203442032	chr2	203448595	6563	DUP	26	0	1	0	1	0
chr2_206898885_chr2_206938774_+-	chr2	206898885	chr2	206938774	-39884	DEL	53	1	0	0	1	1
chr2_212873189_chr2_212875617_+-	chr2	212873189	chr2	212875617	-2427	DEL	37	1	1	0	1	0
chr2_213218405_chr2_213233841_-+	chr2	213218405	chr2	213233841	15437	DUP	35	0	1	0	1	0
chr2_218720744_chr2_218725198_-+	chr2	218720744	chr2	218725198	4455	DUP	35	0	1	0	1	0
chr2_221242363_chr6_52995665_+-	chr2	221242363	chr6	52995665	0	TRA	12	0	1	0	1	0
chr2_221242434_chr2_221250908_++	chr2	221242434	chr2	221250908	8499	INV	40	1	1	0	1	0
chr2_221250897_chr6_52995868_++	chr2	221250897	chr6	52995868	0	TRA	17	0	1	0	1	0
chr2_222734335_chr2_222874870_-+	chr2	222734335	chr2	222874870	140536	DUP	50	1	1	0	1	1
chr2_225248375_chr2_191798361_++	chr2	225248375	chr2	191798361	33450031	INV	10	1	0	0	0	1
chr2_226715423_chr2_226715424_+-	chr2	226715423	chr2	226715424	822	INS	3	1	1	0	0	0
chr2_228946662_chr2_228951934_+-	chr2	228946662	chr2	228951934	-5271	DEL	37	1	1	0	1	0
chr2_231159307_chr2_231159365_+-	chr2	231159307	chr2	231159365	-58	DEL	15	1	1	0	1	0
chr2_231443734_chr3_57823644_++	chr2	231443734	chr3	57823644	0	TRA	40	1	1	0	1	1
chr2_231845289_chr2_231845652_+-	chr2	231845289	chr2	231845652	-431	DEL	2	1	1	0	0	0
chr2_232844975_chr2_232844977_+-	chr2	232844975	chr2	232844977	773	INS	4	1	1	0	0	0
chr2_233567651_chr2_233567861_++	chr2	233567651	chr2	233567861	-221	DEL	2	1	1	0	0	0
chr2_235303325_chr2_235323877_-+	chr2	235303325	chr2	235323877	20552	DUP	29	0	1	0	1	0
chr2_235802997_chr2_235802997_+-	chr2	235802997	chr2	235802997	542	INS	2	1	1	0	0	0
chr2_236345184_chr2_236345185_+-	chr2	236345184	chr2	236345185	755	INS	2	1	1	0	0	0
chr2_237549188_chr2_237549257_+-	chr2	237549188	chr2	237549257	-69	DEL	15	1	1	0	1	0
chr2_238409334_chr2_238409389_++	chr2	238409334	chr2	238409389	-54	DEL	3	0	1	0	1	0
chr2_238762721_chr2_238779888_+-	chr2	238762721	chr2	238779888	-17163	DEL	37	1	1	0	1	0
chr2_239644967_chr2_239644967_+-	chr2	239644967	chr2	239644967	654	INS	2	1	1	0	0	0
chr2_239865999_chr2_239866001_+-	chr2	239865999	chr2	239866001	202	INS	3	1	1	0	0	0
chr2_239899067_chr2_239899247_++	chr2	239899067	chr2	239899247	-191	DEL	3	1	1	0	0	0
chr2_241187777_chr2_241187779_+-	chr2	241187777	chr2	241187779	69	INS	3	1	1	0	0	0
chr2_241205575_chr2_241206387_++	chr2	241205575	chr2	241206387	-860	DEL	2	1	1	0	0	0
chr2_241591009_chr2_241591010_+-	chr2	241591009	chr2	241591010	689	INS	2	1	1	0	0	0
chr2_241805942_chr2_241806009_++	chr2	241805942	chr2	241806009	-66	DEL	2	1	1	0	0	0
chr2_241813839_chr2_241813840_+-	chr2	241813839	chr2	241813840	57	INS	2	1	1	0	0	0
chr2_242006404_chr2_242007082_+-	chr2	242006404	chr2	242007082	-675	DEL	2	1	1	0	0	0
chr2_242181188_chr8_111668537_+-	chr2	242181188	chr8	111668537	0	TRA	3	0	1	0	1	0
chr20_72846_chr1_69606524_-+	chr20	72846	chr1	69606524	0	TRA	33	0	0	0	1	1
chr20_464323_chr20_464375_+-	chr20	464323	chr20	464375	-52	DEL	13	1	1	0	1	0
chr20_764480_chr20_764481_+-	chr20	764480	chr20	764481	71	INS	2	1	1	0	0	0
chr20_3120460_chr20_3122657_-+	chr20	3120460	chr20	3122657	-2197	DEL	19	0	1	0	1	0
chr20_3883337_chr20_3907159_+-	chr20	3883337	chr20	3907159	-23829	DEL	12	1	1	0	1	0
chr20_5823713_chr20_5823783_+-	chr20	5823713	chr20	5823783	-70	DEL	4	1	0	0	1	0
chr20_8958620_chr20_9041184_-+	chr20	8958620	chr20	9041184	82557	DUP	18	0	1	0	1	1
chr20_9015636_chr20_9015637_+-	chr20	9015636	chr20	9015637	57	INS	2	1	1	0	0	0
chr20_10703468_chr20_10703469_+-	chr20	10703468	chr20	10703469	66	INS	2	1	1	0	0	0
chr20_13629924_chr20_14539024_-+	chr20	13629924	chr20	14539024	909104	DUP	53	1	1	0	1	1
chr20_14539025_chr20_13629922_++	chr20	14539025	chr20	13629922	909102	INV	7	1	0	0	0	1
chr20_15190923_chr20_15191821_+-	chr20	15190923	chr20	15191821	-898	DEL	37	1	1	0	1	0
chr20_19924351_chr20_19924352_+-	chr20	19924351	chr20	19924352	74	INS	2	1	1	0	0	0
chr20_23636321_chr20_23636694_+-	chr20	23636321	chr20	23636694	-373	DEL	32	1	1	0	1	0
chr20_25033697_chr20_25041556_+-	chr20	25033697	chr20	25041556	-7859	DEL	37	1	1	0	1	0
chr20_31067569_chr20_31067574_+-	chr20	31067569	chr20	31067574	113	INS	2	1	1	0	0	0
chr20_31408150_chr20_31454544_-+	chr20	31408150	chr20	31454544	46396	DUP	45	0	1	0	1	1
chr20_32350558_chr20_32402837_-+	chr20	32350558	chr20	32402837	52279	DUP	43	1	1	0	1	1
chr20_33510833_chr20_33511008_+-	chr20	33510833	chr20	33511008	-175	DEL	28	1	1	0	1	0
chr20_33657139_chr20_37217922_++	chr20	33657139	chr20	37217922	3560776	INV	26	0	0	0	1	1
chr20_33704380_chr20_37283438_++	chr20	33704380	chr20	37283438	3579054	INV	24	0	0	0	1	1
chr20_33962986_chr9_107162606_-+	chr20	33962986	chr9	107162606	0	TRA	36	1	0	0	1	1
chr20_34521339_chr20_34521416_++	chr20	34521339	chr20	34521416	-76	DEL	3	0	1	0	1	0
chr20_35097618_chr20_35097618_+-	chr20	35097618	chr20	35097618	324	INS	2	1	1	0	0	0
chr20_41196496_chr20_41196508_+-	chr20	41196496	chr20	41196508	95	INS	2	1	1	0	0	0
chr20_42090396_chr20_42096782_-+	chr20	42090396	chr20	42096782	6387	DUP	34	1	1	0	1	0
chr20_43696968_chr20_43696968_+-	chr20	43696968	chr20	43696968	496	INS	2	1	1	0	0	0
chr20_44612986_chr20_44613683_+-	chr20	44612986	chr20	44613683	-697	DEL	37	1	1	0	1	0
chr20_46231677_chr20_46234645_+-	chr20	46231677	chr20	46234645	-2968	DEL	35	1	1	0	1	0
chr20_50816300_chr20_50816300_+-	chr20	50816300	chr20	50816300	607	INS	2	1	1	0	0	0
chr20_51890791_chr20_51890859_++	chr20	51890791	chr20	51890859	-71	DEL	2	1	1	0	0	0
chr20_54073173_chr20_54073174_+-	chr20	54073173	chr20	54073174	60	INS	2	1	1	0	0	0
chr20_54645419_chr20_54645420_+-	chr20	54645419	chr20	54645420	164	INS	2	1	1	0	0	0
chr20_59133202_chr20_59133203_+-	chr20	59133202	chr20	59133203	227	INS	2	1	1	0	0	0
chr20_59238268_chr20_59247550_-+	chr20	59238268	chr20	59247550	9282	DUP	36	1	1	0	1	0
chr20_60409703_chr20_60410393_++	chr20	60409703	chr20	60410393	-644	DEL	2	1	1	0	0	0
chr20_60903092_chr20_60903093_+-	chr20	60903092	chr20	60903093	83	INS	2	1	1	0	0	0
chr20_61428143_chr20_61450857_+-	chr20	61428143	chr20	61450857	-22714	DEL	38	1	1	0	1	1
chr20_62057614_chr20_62058352_++	chr20	62057614	chr20	62058352	-711	DEL	3	1	1	0	0	0
chr20_62349744_chr20_62349745_+-	chr20	62349744	chr20	62349745	1588	INS	2	1	1	0	0	0
chr20_62380583_chr20_62395189_-+	chr20	62380583	chr20	62395189	14607	DUP	32	0	1	0	1	0
chr20_62755581_chr20_62755947_-+	chr20	62755581	chr20	62755947	327	DUP	2	0	1	0	1	0
chr20_62993636_chr20_62993703_++	chr20	62993636	chr20	62993703	-67	DEL	2	1	1	0	0	0
chr20_63103451_chr20_63103452_+-	chr20	63103451	chr20	63103452	428	INS	2	1	1	0	0	0
chr20_63351180_chr20_63351180_+-	chr20	63351180	chr20	63351180	70	INS	2	1	1	0	0	0
chr20_63372285_chr20_63372468_++	chr20	63372285	chr20	63372468	-187	DEL	2	1	1	0	0	0
chr20_63486917_chr20_63486917_+-	chr20	63486917	chr20	63486917	714	INS	2	1	1	0	0	0
chr20_63808086_chr20_63808087_+-	chr20	63808086	chr20	63808087	70	INS	2	1	1	0	0	0
chr20_63970905_chr20_63970937_+-	chr20	63970905	chr20	63970937	87	INS	3	1	1	0	0	0
chr20_64270864_chr20_64271080_++	chr20	64270864	chr20	64271080	-217	DEL	2	1	1	0	0	0
chr21_8041399_chr21_8041400_+-	chr21	8041399	chr21	8041400	171	INS	2	1	1	0	0	0
chr21_8813821_chr21_8813822_+-	chr21	8813821	chr21	8813822	60	INS	2	1	1	0	0	0
chr21_9023166_chr21_9023167_+-	chr21	9023166	chr21	9023167	192	INS	2	1	1	0	0	0
chr21_10389626_chr21_10389627_+-	chr21	10389626	chr21	10389627	124	INS	2	1	1	0	0	0
chr21_10426974_chr21_10426975_+-	chr21	10426974	chr21	10426975	81	INS	2	1	1	0	0	0
chr21_10684476_chr21_10684494_+-	chr21	10684476	chr21	10684494	138	INS	2	1	1	0	0	0
chr21_10792768_chr21_10792853_+-	chr21	10792768	chr21	10792853	-86	DEL	3	1	1	0	0	0
chr21_10812630_chr21_10812802_++	chr21	10812630	chr21	10812802	-172	DEL	2	1	1	0	0	0
chr21_13017861_chr21_13017862_+-	chr21	13017861	chr21	13017862	453	INS	2	1	1	0	0	0
chr21_14161643_chr21_14161696_+-	chr21	14161643	chr21	14161696	-67	DEL	2	1	1	0	0	0
chr21_20048568_chr21_20048622_+-	chr21	20048568	chr21	20048622	-54	DEL	11	1	0	0	1	0
chr21_20742470_chr21_20742470_+-	chr21	20742470	chr21	20742470	102	INS	3	1	1	0	0	0
chr21_22825439_chr21_22825731_+-	chr21	22825439	chr21	22825731	-292	DEL	33	1	0	0	1	0
chr21_25094920_chr21_25095904_+-	chr21	25094920	chr21	25095904	-984	DEL	35	1	1	0	1	0
chr21_27425170_chr21_27425186_+-	chr21	27425170	chr21	27425186	69	INS	2	1	1	0	0	0
chr21_29118188_chr21_29118188_+-	chr21	29118188	chr21	29118188	3124	INS	2	1	1	0	0	0
chr21_33337703_chr21_33337704_+-	chr21	33337703	chr21	33337704	52	INS	2	1	1	0	0	0
chr21_36216043_chr21_36216339_++	chr21	36216043	chr21	36216339	-297	DEL	2	1	1	0	0	0
chr21_36699989_chr21_36950158_++	chr21	36699989	chr21	36950158	250168	INV	52	1	1	0	1	1
chr21_36702382_chr21_45711282_++	chr21	36702382	chr21	45711282	9008902	INV	52	1	1	0	1	1
chr21_36950158_chr21_36699989_++	chr21	36950158	chr21	36699989	250169	INV	17	1	0	0	1	1
chr21_38895598_chr3_193123359_-+	chr21	38895598	chr3	193123359	0	TRA	43	0	1	0	1	1
chr21_41249189_chr21_41249190_+-	chr21	41249189	chr21	41249190	74	INS	2	1	1	0	0	0
chr21_41313624_chr21_41313624_+-	chr21	41313624	chr21	41313624	163	INS	3	1	1	0	0	0
chr21_42975947_chr21_43035721_-+	chr21	42975947	chr21	43035721	59763	DUP	46	0	1	0	1	1
chr21_44928861_chr21_44928862_+-	chr21	44928861	chr21	44928862	56	INS	2	1	1	0	0	0
chr21_44974355_chr21_44974581_+-	chr21	44974355	chr21	44974581	-226	DEL	34	1	1	0	1	0
chr21_45055113_chr21_45055114_+-	chr21	45055113	chr21	45055114	1608	INS	2	1	1	0	0	0
chr21_45108744_chr21_45108810_+-	chr21	45108744	chr21	45108810	-62	DEL	2	1	1	0	0	0
chr21_45330617_chr21_45330704_+-	chr21	45330617	chr21	45330704	-88	DEL	2	1	1	0	0	0
chr21_45388904_chr21_45388905_+-	chr21	45388904	chr21	45388905	132	INS	2	1	1	0	0	0
chr21_45537577_chr21_45537577_+-	chr21	45537577	chr21	45537577	120	INS	2	1	1	0	0	0
chr21_46085558_chr21_46085559_+-	chr21	46085558	chr21	46085559	189	INS	2	1	1	0	0	0
chr21_46090903_chr21_46091016_+-	chr21	46090903	chr21	46091016	334	INS	2	1	1	0	0	0
chr21_46140888_chr21_46140889_+-	chr21	46140888	chr21	46140889	95	INS	2	1	1	0	0	0
chr22_10721143_chr22_10721427_+-	chr22	10721143	chr22	10721427	-293	DEL	2	1	1	0	0	0
chr22_10726438_chr22_10726438_+-	chr22	10726438	chr22	10726438	233	INS	2	1	1	0	0	0
chr22_11366783_chr22_11367124_++	chr22	11366783	chr22	11367124	-340	DEL	5	1	1	0	1	0
chr22_12607418_chr22_12607418_+-	chr22	12607418	chr22	12607418	431	INS	3	1	1	0	0	0
chr22_12637706_chr22_12637708_+-	chr22	12637706	chr22	12637708	117	INS	2	1	1	0	0	0
chr22_15950161_chr22_15950502_++	chr22	15950161	chr22	15950502	-342	DEL	2	1	1	0	0	0
chr22_16471705_chr22_16471769_+-	chr22	16471705	chr22	16471769	-64	DEL	3	1	1	0	0	0
chr22_18977652_chr22_18977733_+-	chr22	18977652	chr22	18977733	-81	DEL	4	0	1	0	1	0
chr22_19393375_chr22_19398131_-+	chr22	19393375	chr22	19398131	4755	DUP	23	0	1	0	1	0
chr22_20272153_chr1_1117831_--	chr22	20272153	chr1	1117831	0	TRA	41	1	0	0	1	1
chr22_22347840_chr22_22393148_++	chr22	22347840	chr22	22393148	49462	INV	11	1	1	0	0	1
chr22_22683177_chr11_70540270_-+	chr22	22683177	chr11	70540270	0	TRA	41	1	0	0	1	1
chr22_22761464_chr22_22761559_+-	chr22	22761464	chr22	22761559	-91	DEL	3	1	1	0	0	0
chr22_22828353_chr22_22828691_+-	chr22	22828353	chr22	22828691	-336	DEL	31	1	1	0	1	0
chr22_23292769_chr22_23292820_+-	chr22	23292769	chr22	23292820	-51	DEL	15	1	1	0	1	0
chr22_24895685_chr22_24899391_-+	chr22	24895685	chr22	24899391	3705	DUP	36	1	1	0	1	0
chr22_25288711_chr22_25585337_-+	chr22	25288711	chr22	25585337	296607	DUP	5	0	0	0	1	1
chr22_25436695_chr22_25436696_+-	chr22	25436695	chr22	25436696	54	INS	2	1	1	0	0	0
chr22_27611239_chr22_27611250_+-	chr22	27611239	chr22	27611250	133	INS	2	1	1	0	0	0
chr22_27620110_chr3_87972198_++	chr22	27620110	chr3	87972198	0	TRA	3	0	1	0	1	0
chr22_29941768_chr7_134940720_++	chr22	29941768	chr7	134940720	0	TRA	22	0	0	0	1	1
chr22_32146214_chr22_32147842_+-	chr22	32146214	chr22	32147842	-1617	DEL	13	1	1	0	1	0
chr22_34952140_chr22_34952257_-+	chr22	34952140	chr22	34952257	-118	DEL	26	1	1	0	1	0
chr22_35208100_chr22_35208208_-+	chr22	35208100	chr22	35208208	-107	DEL	26	1	1	0	1	0
chr22_36092213_chr22_36418422_+-	chr22	36092213	chr22	36418422	-326204	DEL	58	1	1	0	1	1
chr22_37134667_chrX_56551291_++	chr22	37134667	chrX	56551291	0	TRA	46	1	1	0	1	1
chr22_37227301_chr22_37227302_+-	chr22	37227301	chr22	37227302	412	INS	2	1	1	0	0	0
chr22_38189252_chr22_38189253_+-	chr22	38189252	chr22	38189253	367	INS	2	1	1	0	0	0
chr22_38923757_chr22_38923757_+-	chr22	38923757	chr22	38923757	70	INS	2	1	1	0	0	0
chr22_39583719_chr22_39583836_-+	chr22	39583719	chr22	39583836	-117	DEL	26	1	1	0	1	0
chr22_39744950_chr22_39753359_-+	chr22	39744950	chr22	39753359	8408	DUP	34	0	1	0	1	0
chr22_40537783_chr22_40537784_+-	chr22	40537783	chr22	40537784	70	INS	2	1	1	0	0	0
chr22_40889940_chr22_40893272_-+	chr22	40889940	chr22	40893272	3332	DUP	34	0	1	0	1	0
chr22_41594359_chr22_41594359_+-	chr22	41594359	chr22	41594359	60	INS	4	1	1	0	0	0
chr22_41939795_chr22_41939795_+-	chr22	41939795	chr22	41939795	1176	INS	2	1	1	0	0	0
chr22_44213762_chr22_44213762_+-	chr22	44213762	chr22	44213762	85	INS	2	1	1	0	0	0
chr22_45228893_chr22_45229369_-+	chr22	45228893	chr22	45229369	458	DUP	2	0	1	0	1	0
chr22_46615203_chr22_46615457_++	chr22	46615203	chr22	46615457	-255	DEL	2	1	1	0	0	0
chr22_47093608_chr8_65005875_-+	chr22	47093608	chr8	65005875	0	TRA	37	1	1	0	1	1
chr22_47128186_chr22_47128186_+-	chr22	47128186	chr22	47128186	602	INS	2	1	1	0	0	0
chr22_47379339_chr22_47379366_+-	chr22	47379339	chr22	47379366	721	INS	2	1	1	0	0	0
chr22_48253001_chr22_48253240_++	chr22	48253001	chr22	48253240	-242	DEL	2	1	1	0	0	0
chr22_48414818_chr22_48414818_+-	chr22	48414818	chr22	48414818	117	INS	2	1	1	0	0	0
chr22_48735961_chr22_48736047_+-	chr22	48735961	chr22	48736047	-86	DEL	2	1	1	0	0	0
chr22_48757443_chr22_48757444_+-	chr22	48757443	chr22	48757444	856	INS	2	1	1	0	0	0
chr22_49494191_chr22_49494192_+-	chr22	49494191	chr22	49494192	584	INS	2	1	1	0	0	0
chr22_49656923_chr22_49656924_+-	chr22	49656923	chr22	49656924	211	INS	2	1	1	0	0	0
chr22_49672774_chr22_49672849_+-	chr22	49672774	chr22	49672849	-77	DEL	2	1	1	0	0	0
chr22_49802698_chr22_49802699_+-	chr22	49802698	chr22	49802699	166	INS	2	1	1	0	0	0
chr22_50009932_chr22_50009932_+-	chr22	50009932	chr22	50009932	424	INS	2	1	1	0	0	0
chr22_50285630_chr22_50285631_+-	chr22	50285630	chr22	50285631	139	INS	2	1	1	0	0	0
chr22_50807260_chr22_50807260_+-	chr22	50807260	chr22	50807260	388	INS	2	1	1	0	0	0
chr3_483219_chr3_483463_+-	chr3	483219	chr3	483463	-216	DEL	2	1	1	0	0	0
chr3_1764057_chr3_1764058_+-	chr3	1764057	chr3	1764058	54	INS	2	1	1	0	0	0
chr3_6311409_chr3_6311410_+-	chr3	6311409	chr3	6311410	99	INS	2	1	1	0	0	0
chr3_6699686_chr3_6699765_+-	chr3	6699686	chr3	6699765	-78	DEL	2	1	1	0	0	0
chr3_8010305_chr3_8010307_+-	chr3	8010305	chr3	8010307	129	INS	3	1	1	0	0	0
chr3_8502303_chr3_8502304_+-	chr3	8502303	chr3	8502304	170	INS	2	1	1	0	0	0
chr3_11487535_chr3_11487622_+-	chr3	11487535	chr3	11487622	697	INS	2	1	1	0	0	0
chr3_15592794_chr3_15592929_++	chr3	15592794	chr3	15592929	-137	DEL	2	1	1	0	0	0
chr3_20009237_chr3_20009362_+-	chr3	20009237	chr3	20009362	-125	DEL	6	0	1	0	1	0
chr3_28732640_chr3_28732725_++	chr3	28732640	chr3	28732725	-84	DEL	2	1	1	0	0	0
chr3_33043770_chr3_33043777_+-	chr3	33043770	chr3	33043777	136	INS	3	1	1	0	0	0
chr3_37178905_chr3_37179142_+-	chr3	37178905	chr3	37179142	-238	DEL	14	0	1	0	1	0
chr3_39197862_chr3_39197916_++	chr3	39197862	chr3	39197916	-68	DEL	3	1	1	0	0	0
chr3_41891322_chr3_41891323_+-	chr3	41891322	chr3	41891323	244	INS	2	1	1	0	0	0
chr3_47316723_chr3_47316727_+-	chr3	47316723	chr3	47316727	64	INS	3	1	1	0	0	0
chr3_48212443_chr3_48212444_+-	chr3	48212443	chr3	48212444	245	INS	2	1	1	0	0	0
chr3_50312168_chr3_50312169_+-	chr3	50312168	chr3	50312169	346	INS	2	1	1	0	0	0
chr3_53991006_chr3_53991010_+-	chr3	53991006	chr3	53991010	288	INS	2	1	1	0	0	0
chr3_55712585_chr3_55712641_+-	chr3	55712585	chr3	55712641	-56	DEL	15	1	1	0	1	0
chr3_57889663_chr3_57904804_-+	chr3	57889663	chr3	57904804	15137	DUP	36	1	1	0	1	0
chr3_58873693_chr3_58873694_+-	chr3	58873693	chr3	58873694	89	INS	2	1	1	0	0	0
chr3_59744809_chr3_59746317_+-	chr3	59744809	chr3	59746317	-1508	DEL	37	1	1	0	1	0
chr3_60441919_chr3_60509241_+-	chr3	60441919	chr3	60509241	-67299	DEL	2	0	0	0	1	1
chr3_60846509_chr3_61259348_+-	chr3	60846509	chr3	61259348	-412850	DEL	12	0	1	0	1	1
chr3_60860584_chr3_60860584_+-	chr3	60860584	chr3	60860584	395	INS	3	1	1	0	0	0
chr3_62761934_chr16_79254493_++	chr3	62761934	chr16	79254493	0	TRA	39	1	1	1	1	1
chr3_62945798_chr3_84209753_+-	chr3	62945798	chr3	84209753	-21263840	DEL	55	1	1	1	1	1
chr3_63310994_chr3_82539610_-+	chr3	63310994	chr3	82539610	19228615	DUP	58	1	1	0	1	1
chr3_66874240_chr3_66874376_+-	chr3	66874240	chr3	66874376	-125	DEL	2	1	1	0	0	0
chr3_70861569_chr3_75586094_-+	chr3	70861569	chr3	75586094	4724526	DUP	55	1	1	0	1	1
chr3_71011840_chr3_78942777_++	chr3	71011840	chr3	78942777	7930937	INV	55	1	1	1	1	1
chr3_71261240_chr3_82438440_++	chr3	71261240	chr3	82438440	11177199	INV	57	1	1	0	1	1
chr3_71328376_chr3_71328481_-+	chr3	71328376	chr3	71328481	-104	DEL	25	1	1	0	1	0
chr3_71330030_chr3_78815734_+-	chr3	71330030	chr3	78815734	-7485701	DEL	57	1	1	0	1	1
chr3_72772342_chr3_81963264_++	chr3	72772342	chr3	81963264	9191013	INV	7	0	0	1	0	1
chr3_72772346_chr3_80244625_-+	chr3	72772346	chr3	80244625	7472285	DUP	56	1	1	0	1	1
chr3_73235329_chr3_73690708_+-	chr3	73235329	chr3	73690708	-455375	DEL	54	1	1	0	1	1
chr3_75586103_chr3_70861605_++	chr3	75586103	chr3	70861605	4724523	INV	10	1	0	0	0	1
chr3_76014467_chr3_76014467_+-	chr3	76014467	chr3	76014467	59	INS	2	1	1	0	0	0
chr3_76730372_chr3_76730676_+-	chr3	76730372	chr3	76730676	-333	DEL	2	1	1	0	0	0
chr3_77164759_chr3_77164889_+-	chr3	77164759	chr3	77164889	-129	DEL	2	1	1	0	0	0
chr3_77295932_chr3_77295932_+-	chr3	77295932	chr3	77295932	55	INS	3	1	1	0	0	0
chr3_78095549_chr3_82133854_-+	chr3	78095549	chr3	82133854	4038309	DUP	54	1	1	0	1	1
chr3_78537270_chr3_79885756_+-	chr3	78537270	chr3	79885756	-1348484	DEL	54	1	1	0	1	1
chr3_78539970_chr3_83851896_-+	chr3	78539970	chr3	83851896	5311927	DUP	52	1	1	0	1	1
chr3_63432283_chr3_78657594_++	chr3	63432283	chr3	78657594	15225305	INV	20	1	0	0	1	1
chr3_78718820_chr3_78718878_++	chr3	78718820	chr3	78718878	56	INV	2	1	1	0	0	0
chr3_78815734_chr3_71330032_++	chr3	78815734	chr3	71330032	7485701	INV	11	1	0	0	0	1
chr3_79885746_chr3_78537255_++	chr3	79885746	chr3	78537255	1348484	INV	8	1	0	0	0	1
chr3_79945732_chr3_85636035_+-	chr3	79945732	chr3	85636035	5690300	BND	53	1	1	0	1	1
chr3_80179601_chr3_81962988_++	chr3	80179601	chr3	81962988	1783387	INV	55	1	1	0	1	1
chr3_80244626_chr3_72772342_++	chr3	80244626	chr3	72772342	7472285	INV	10	1	0	0	0	1
chr3_82133864_chr3_78095537_++	chr3	82133864	chr3	78095537	4038308	INV	8	1	0	0	0	1
chr3_82464559_chr3_82464650_+-	chr3	82464559	chr3	82464650	-84	DEL	3	1	1	0	0	0
chr3_82539619_chr3_63310980_++	chr3	82539619	chr3	63310980	19228622	INV	12	1	0	0	0	1
chr3_82658904_chr3_85433868_-+	chr3	82658904	chr3	85433868	2774968	DUP	56	1	1	0	1	1
chr3_83495731_chr3_83495784_+-	chr3	83495731	chr3	83495784	-52	DEL	2	1	1	0	0	0
chr3_83851907_chr3_78539959_++	chr3	83851907	chr3	78539959	5311929	INV	8	1	0	0	0	1
chr3_84209746_chr3_62945811_++	chr3	84209746	chr3	62945811	21263956	INV	8	1	0	0	0	1
chr3_84815808_chr3_84816382_+-	chr3	84815808	chr3	84816382	-573	DEL	37	1	1	0	1	0
chr3_85433879_chr3_82658893_++	chr3	85433879	chr3	82658893	2774969	INV	10	1	0	0	0	1
chr3_85636029_chr3_79945743_++	chr3	85636029	chr3	79945743	5690299	INV	7	1	0	0	0	1
chr3_87849281_chr3_87851006_+-	chr3	87849281	chr3	87851006	-1724	DEL	35	1	1	0	1	0
chr3_87972198_chr11_109922394_++	chr3	87972198	chr11	109922394	0	TRA	10	0	1	0	1	0
chr3_87972198_chr22_27620110_--	chr3	87972198	chr22	27620110	0	TRA	3	0	1	0	1	0
chr3_87975225_chr5_55151917_++	chr3	87975225	chr5	55151917	0	TRA	21	0	1	0	1	0
chr3_88491965_chr3_88492040_+-	chr3	88491965	chr3	88492040	-75	DEL	4	0	1	0	1	0
chr3_90444432_chr3_90445013_+-	chr3	90444432	chr3	90445013	-580	DEL	36	1	1	0	1	0
chr3_90497686_chr3_90497687_+-	chr3	90497686	chr3	90497687	1358	INS	2	1	1	0	0	0
chr3_90536508_chr3_90537869_++	chr3	90536508	chr3	90537869	-1361	DEL	3	1	1	0	0	0
chr3_105663070_chr3_105663071_+-	chr3	105663070	chr3	105663071	63	INS	2	1	1	0	0	0
chr3_106111534_chr3_106111535_+-	chr3	106111534	chr3	106111535	170	INS	2	1	1	0	0	0
chr3_107692976_chr3_107700415_+-	chr3	107692976	chr3	107700415	-8105	DEL	8	1	1	0	1	0
chr3_111555239_chr8_127521584_--	chr3	111555239	chr8	127521584	0	TRA	3	1	0	0	0	1
chr3_114378168_chr3_114449300_+-	chr3	114378168	chr3	114449300	-71128	DEL	53	1	0	0	1	1
chr3_122444191_chr3_128186721_++	chr3	122444191	chr3	128186721	5742283	INV	46	1	1	1	1	1
chr3_122468658_chr3_128186692_++	chr3	122468658	chr3	128186692	5718031	INV	50	1	1	0	1	1
chr3_124009929_chr3_124010060_+-	chr3	124009929	chr3	124010060	-130	DEL	19	1	1	0	1	0
chr3_127664755_chr3_161997549_-+	chr3	127664755	chr3	161997549	34332784	DUP	57	1	1	1	1	1
chr3_128156535_chr3_128157086_+-	chr3	128156535	chr3	128157086	-550	DEL	37	1	1	0	1	0
chr3_129641103_chr3_129720971_-+	chr3	129641103	chr3	129720971	79876	DUP	44	0	1	0	1	1
chr3_131207600_chr3_131263712_++	chr3	131207600	chr3	131263712	-56127	DEL	3	0	0	0	1	1
chr3_131978049_chr3_131978050_+-	chr3	131978049	chr3	131978050	1187	INS	2	1	1	0	0	0
chr3_134295227_chr3_134295413_+-	chr3	134295227	chr3	134295413	-186	DEL	37	1	1	0	1	0
chr3_134647440_chr3_142761019_++	chr3	134647440	chr3	142761019	8113547	INV	44	0	1	1	1	1
chr3_135318331_chr3_135318331_+-	chr3	135318331	chr3	135318331	309	INS	3	1	1	0	0	0
chr3_134601489_chr3_135806905_++	chr3	134601489	chr3	135806905	1205416	INV	12	0	0	0	1	1
chr3_141248601_chr3_141248704_++	chr3	141248601	chr3	141248704	-107	DEL	2	1	1	0	0	0
chr3_141837446_chr3_141850118_-+	chr3	141837446	chr3	141850118	12672	DUP	35	0	1	0	1	0
chr3_143402916_chr3_143402916_+-	chr3	143402916	chr3	143402916	6103	INS	2	1	1	0	0	0
chr3_143978604_chr3_143978659_+-	chr3	143978604	chr3	143978659	-55	DEL	3	1	1	0	0	0
chr3_149240989_chr8_128780993_++	chr3	149240989	chr8	128780993	0	TRA	22	0	1	0	1	1
chr3_149241018_chr17_43084371_++	chr3	149241018	chr17	43084371	0	TRA	8	0	1	0	1	0
chr3_149343768_chr3_149403385_-+	chr3	149343768	chr3	149403385	59587	DUP	8	0	0	0	1	1
chr3_150822046_chr3_150822215_++	chr3	150822046	chr3	150822215	-169	DEL	3	1	1	0	0	0
chr3_155287865_chr3_155294095_-+	chr3	155287865	chr3	155294095	6229	DUP	36	1	1	0	1	0
chr3_156899464_chr3_156899530_++	chr3	156899464	chr3	156899530	-62	DEL	2	1	1	0	0	0
chr3_157523675_chr3_157523681_+-	chr3	157523675	chr3	157523681	144	INS	3	1	1	0	0	0
chr3_159685984_chr3_159686054_+-	chr3	159685984	chr3	159686054	-70	DEL	5	0	1	0	1	0
chr3_161997559_chr3_127664743_++	chr3	161997559	chr3	127664743	34332800	INV	10	1	0	0	0	1
chr3_162807961_chr3_162829866_++	chr3	162807961	chr3	162829866	21903	INV	2	1	0	0	0	1
chr3_169263283_chr6_84216273_++	chr3	169263283	chr6	84216273	0	TRA	50	1	1	0	1	1
chr3_169898430_chr3_169898481_+-	chr3	169898430	chr3	169898481	-51	DEL	14	1	1	0	1	0
chr3_174484338_chr3_174484620_+-	chr3	174484338	chr3	174484620	-287	DEL	2	1	1	0	0	0
chr3_175419893_chr3_175462526_-+	chr3	175419893	chr3	175462526	42633	DUP	41	1	1	0	1	1
chr3_175928096_chr3_175928450_+-	chr3	175928096	chr3	175928450	-354	DEL	35	1	0	0	1	0
chr3_178758002_chr3_178758003_+-	chr3	178758002	chr3	178758003	115	INS	2	1	1	0	0	0
chr3_178759316_chr3_178759412_++	chr3	178759316	chr3	178759412	-92	DEL	2	1	1	0	0	0
chr3_178759729_chr3_178759787_++	chr3	178759729	chr3	178759787	-77	DEL	2	1	1	0	0	0
chr3_179604346_chr3_179604486_-+	chr3	179604346	chr3	179604486	-141	DEL	26	1	1	0	1	0
chr3_183018412_chr3_183018413_+-	chr3	183018412	chr3	183018413	362	INS	2	1	1	0	0	0
chr3_184141676_chr3_184141895_+-	chr3	184141676	chr3	184141895	-217	DEL	33	1	0	0	1	0
chr3_189812210_chr3_189814550_-+	chr3	189812210	chr3	189814550	-2341	DEL	25	0	1	0	1	0
chr3_193123360_chr21_38895599_++	chr3	193123360	chr21	38895599	0	TRA	32	0	1	0	1	1
chr3_193362780_chr3_193362787_+-	chr3	193362780	chr3	193362787	97	INS	2	1	1	0	0	0
chr3_193814284_chr3_193940943_-+	chr3	193814284	chr3	193940943	126661	DUP	51	1	1	0	1	1
chr3_195345107_chr3_195346294_+-	chr3	195345107	chr3	195346294	-1186	DEL	32	1	1	0	1	0
chr3_195682940_chr3_195966466_++	chr3	195682940	chr3	195966466	282176	INV	9	0	0	0	1	1
chr3_195687100_chr3_195687550_+-	chr3	195687100	chr3	195687550	-471	DEL	2	1	1	0	0	0
chr3_195694604_chr3_195694739_++	chr3	195694604	chr3	195694739	-138	DEL	2	1	1	0	0	0
chr3_195760532_chr3_195760532_+-	chr3	195760532	chr3	195760532	652	INS	3	1	1	0	0	0
chr3_197455174_chr3_197455175_+-	chr3	197455174	chr3	197455175	185	INS	2	1	1	0	0	0
chr3_197728154_chr3_197728154_+-	chr3	197728154	chr3	197728154	218	INS	3	1	1	0	0	0
chr4_60336_chr5_7924009_++	chr4	60336	chr5	7924009	0	TRA	55	1	1	0	1	1
chr4_559845_chr4_559846_+-	chr4	559845	chr4	559846	314	INS	2	1	1	0	0	0
chr4_750444_chr4_801352_+-	chr4	750444	chr4	801352	-50905	DEL	52	1	0	0	1	1
chr4_1096333_chr4_1096395_++	chr4	1096333	chr4	1096395	-60	DEL	2	1	1	0	0	0
chr4_1279064_chr4_1279201_++	chr4	1279064	chr4	1279201	-133	DEL	2	1	1	0	0	0
chr4_4012702_chr4_4012703_+-	chr4	4012702	chr4	4012703	2839	INS	3	1	1	0	0	0
chr4_4124762_chr4_4125082_+-	chr4	4124762	chr4	4125082	-320	DEL	2	1	1	0	0	0
chr4_6757142_chr4_6757143_+-	chr4	6757142	chr4	6757143	137	INS	2	1	1	0	0	0
chr4_6879827_chr4_6879828_+-	chr4	6879827	chr4	6879828	289	INS	2	1	1	0	0	0
chr4_7255850_chr4_7255953_+-	chr4	7255850	chr4	7255953	-105	DEL	3	1	1	0	0	0
chr4_8294669_chr4_8294669_+-	chr4	8294669	chr4	8294669	91	INS	3	1	1	0	0	0
chr4_12648453_chr4_12648728_--	chr4	12648453	chr4	12648728	219	INV	2	0	1	0	1	0
chr4_12648634_chr4_12648648_+-	chr4	12648634	chr4	12648648	1127	INS	3	1	1	0	0	0
chr4_14140834_chr6_71773913_++	chr4	14140834	chr6	71773913	0	TRA	44	1	1	0	1	1
chr4_14166149_chr4_14261138_++	chr4	14166149	chr4	14261138	95006	INV	47	1	1	0	1	1
chr4_15443027_chr4_15474076_+-	chr4	15443027	chr4	15474076	-31074	DEL	16	0	0	0	1	1
chr4_16088108_chr4_16094308_-+	chr4	16088108	chr4	16094308	6200	DUP	36	1	1	0	1	0
chr4_16313898_chr4_16313898_+-	chr4	16313898	chr4	16313898	1258	INS	4	1	1	0	0	0
chr4_16737216_chr4_16737270_+-	chr4	16737216	chr4	16737270	-54	DEL	14	1	1	0	1	0
chr4_21714837_chr4_21715010_+-	chr4	21714837	chr4	21715010	-175	DEL	2	1	1	0	0	0
chr4_24786834_chr12_26581844_++	chr4	24786834	chr12	26581844	0	TRA	35	1	0	0	1	1
chr4_36545909_chr4_36545970_+-	chr4	36545909	chr4	36545970	-61	DEL	14	1	1	0	1	0
chr4_39430147_chr4_39435988_-+	chr4	39430147	chr4	39435988	5842	DUP	33	0	1	0	1	0
chr4_46661017_chr4_46662152_+-	chr4	46661017	chr4	46662152	-1135	DEL	28	1	1	0	1	0
chr4_47303316_chr4_47303400_+-	chr4	47303316	chr4	47303400	-84	DEL	14	1	1	0	1	0
chr4_49532502_chr4_49532606_++	chr4	49532502	chr4	49532606	-104	DEL	3	1	1	0	0	0
chr4_52802443_chr4_52802937_+-	chr4	52802443	chr4	52802937	-494	DEL	34	1	1	0	1	0
chr4_53436509_chr4_53441801_-+	chr4	53436509	chr4	53441801	5293	DUP	35	0	1	0	1	0
chr4_57551694_chr4_57555608_-+	chr4	57551694	chr4	57555608	3916	DUP	35	0	1	0	1	0
chr4_60918497_chr4_60918563_+-	chr4	60918497	chr4	60918563	-66	DEL	12	1	1	0	1	0
chr4_65936762_chr4_65936763_+-	chr4	65936762	chr4	65936763	820	INS	2	1	1	0	0	0
chr4_68833994_chr4_126963172_-+	chr4	68833994	chr4	126963172	58129509	DUP	24	0	1	1	1	1
chr4_69762393_chr4_69762393_+-	chr4	69762393	chr4	69762393	169	INS	3	1	1	0	0	0
chr4_71516813_chr4_71517421_-+	chr4	71516813	chr4	71517421	-609	DEL	11	0	1	0	1	0
chr4_73446618_chr4_73446689_+-	chr4	73446618	chr4	73446689	-67	DEL	2	1	1	0	0	0
chr4_75174857_chr4_75174858_+-	chr4	75174857	chr4	75174858	53	INS	2	1	1	0	0	0
chr4_75487868_chr4_75487869_+-	chr4	75487868	chr4	75487869	111	INS	2	1	1	0	0	0
chr4_77507182_chr6_19728360_++	chr4	77507182	chr6	19728360	0	TRA	45	1	1	0	1	1
chr4_81235146_chr4_81235212_+-	chr4	81235146	chr4	81235212	-66	DEL	15	1	1	0	1	0
chr4_83002459_chr4_83002511_-+	chr4	83002459	chr4	83002511	52	DUP	9	1	0	0	1	0
chr4_84586408_chr4_84586658_+-	chr4	84586408	chr4	84586658	-250	DEL	31	1	1	0	1	0
chr4_87378854_chr4_87378964_+-	chr4	87378854	chr4	87378964	-112	DEL	2	1	1	0	0	0
chr4_88026232_chr6_20409990_++	chr4	88026232	chr6	20409990	0	TRA	52	1	1	0	1	1
chr4_89175833_chr4_89176008_+-	chr4	89175833	chr4	89176008	-174	DEL	32	1	1	0	1	0
chr4_89589299_chr4_89589401_+-	chr4	89589299	chr4	89589401	-102	DEL	8	0	1	0	1	0
chr4_89821292_chr4_89821292_+-	chr4	89821292	chr4	89821292	83	INS	2	1	1	0	0	0
chr4_91316993_chr4_91349253_+-	chr4	91316993	chr4	91349253	32273	INV	35	0	1	0	1	1
chr4_91316996_chr4_91317164_++	chr4	91316996	chr4	91317164	166	INV	27	0	1	0	1	0
chr4_94529308_chr4_94529390_+-	chr4	94529308	chr4	94529390	-82	DEL	11	1	0	0	1	0
chr4_95258911_chr4_97443512_++	chr4	95258911	chr4	97443512	2184681	BND	29	1	0	0	1	1
chr4_97443505_chr4_95258757_++	chr4	97443505	chr4	95258757	2184747	INV	7	1	0	0	0	1
chr4_99589035_chr4_99589036_+-	chr4	99589035	chr4	99589036	552	INS	2	1	1	0	0	0
chr4_103437585_chr4_103437585_+-	chr4	103437585	chr4	103437585	53	INS	2	1	1	0	0	0
chr4_104700362_chr4_104703178_+-	chr4	104700362	chr4	104703178	-2816	DEL	35	0	1	0	1	0
chr4_108414200_chr4_108414264_++	chr4	108414200	chr4	108414264	-63	DEL	3	0	1	0	1	0
chr4_111104042_chr4_111104184_-+	chr4	111104042	chr4	111104184	-143	DEL	20	1	1	0	1	0
chr4_113888291_chr4_113888691_-+	chr4	113888291	chr4	113888691	401	DUP	30	0	1	0	1	0
chr4_113888671_chr4_113888672_+-	chr4	113888671	chr4	113888672	394	INS	2	1	1	0	0	0
chr4_120367696_chr4_120367705_+-	chr4	120367696	chr4	120367705	57	INS	3	1	1	0	0	0
chr4_124018221_chr4_124018381_+-	chr4	124018221	chr4	124018381	-152	DEL	2	1	1	0	0	0
chr4_124157086_chr4_124166058_-+	chr4	124157086	chr4	124166058	8973	DUP	35	1	1	0	1	0
chr4_127233095_chr4_127233095_+-	chr4	127233095	chr4	127233095	89	INS	3	1	1	0	0	0
chr4_128278930_chr4_128393030_-+	chr4	128278930	chr4	128393030	114043	DUP	9	0	0	0	1	1
chr4_128521929_chr4_128611414_-+	chr4	128521929	chr4	128611414	89489	DUP	45	1	0	0	1	1
chr4_130238587_chr4_130239458_+-	chr4	130238587	chr4	130239458	-870	DEL	35	1	1	0	1	0
chr4_131078904_chr4_131085425_-+	chr4	131078904	chr4	131085425	6517	DUP	35	0	1	0	1	0
chr4_132311982_chr4_132312060_+-	chr4	132311982	chr4	132312060	-78	DEL	15	1	1	0	1	0
chr4_132681602_chr4_132681661_+-	chr4	132681602	chr4	132681661	-59	DEL	15	1	1	0	1	0
chr4_133413699_chr6_20020557_++	chr4	133413699	chr6	20020557	0	TRA	49	1	1	0	1	1
chr4_133424308_chr6_70658011_++	chr4	133424308	chr6	70658011	0	TRA	51	1	1	0	1	1
chr4_133873002_chr4_133873002_+-	chr4	133873002	chr4	133873002	143	INS	2	1	1	0	0	0
chr4_136899402_chr4_139412951_++	chr4	136899402	chr4	139412951	2513549	INV	46	1	1	0	1	1
chr4_139404342_chr4_140523508_-+	chr4	139404342	chr4	140523508	1119170	DUP	47	1	1	0	1	1
chr4_139418181_chr6_73180973_++	chr4	139418181	chr6	73180973	0	TRA	54	1	1	0	1	1
chr4_140358399_chr4_140365712_-+	chr4	140358399	chr4	140365712	7314	DUP	35	0	1	0	1	0
chr4_144026402_chr4_144026608_+-	chr4	144026402	chr4	144026608	-206	DEL	27	1	1	0	1	0
chr4_151811660_chr4_151811663_+-	chr4	151811660	chr4	151811663	6017	INS	3	1	1	0	0	0
chr4_156102534_chr4_156102535_+-	chr4	156102534	chr4	156102535	51	INS	2	1	1	0	0	0
chr4_156325352_chr4_156325352_+-	chr4	156325352	chr4	156325352	120	INS	2	1	1	0	0	0
chr4_157637140_chr4_157637140_+-	chr4	157637140	chr4	157637140	115	INS	2	1	1	0	0	0
chr4_159523770_chr4_159523900_++	chr4	159523770	chr4	159523900	-128	DEL	3	1	1	0	0	0
chr4_167905109_chr4_167905110_+-	chr4	167905109	chr4	167905110	59	INS	3	1	1	0	0	0
chr4_168693196_chr4_168693197_+-	chr4	168693196	chr4	168693197	237	INS	2	1	1	0	0	0
chr4_169867808_chr1_203769837_-+	chr4	169867808	chr1	203769837	0	TRA	39	1	0	0	1	1
chr4_174320514_chr4_174320514_+-	chr4	174320514	chr4	174320514	2615	INS	2	1	1	0	0	0
chr4_175181025_chr4_175181028_+-	chr4	175181025	chr4	175181028	62	INS	2	1	1	0	0	0
chr4_186432415_chr4_186436112_++	chr4	186432415	chr4	186436112	-3699	DEL	2	1	1	0	0	0
chr4_186981760_chr4_186981761_+-	chr4	186981760	chr4	186981761	59	INS	2	1	1	0	0	0
chr4_187214545_chr4_187214619_++	chr4	187214545	chr4	187214619	-75	DEL	2	1	1	0	0	0
chr4_187820387_chr4_187820512_+-	chr4	187820387	chr4	187820512	-125	DEL	26	1	1	0	1	0
chr4_188505255_chr4_188505316_+-	chr4	188505255	chr4	188505316	-61	DEL	3	1	1	0	0	0
chr4_189036202_chr4_189036212_+-	chr4	189036202	chr4	189036212	1910	INS	2	1	1	0	0	0
chr4_189051056_chr4_189051298_++	chr4	189051056	chr4	189051298	-216	DEL	3	1	1	0	0	0
chr4_189308512_chr4_189308513_+-	chr4	189308512	chr4	189308513	119	INS	2	1	1	0	0	0
chr4_189364120_chr4_189364121_+-	chr4	189364120	chr4	189364121	181	INS	2	1	1	0	0	0
chr4_189380743_chr4_189380744_+-	chr4	189380743	chr4	189380744	179	INS	2	1	1	0	0	0
chr4_189490678_chr4_189490679_+-	chr4	189490678	chr4	189490679	136	INS	2	1	1	0	0	0
chr4_189735784_chr4_189735923_++	chr4	189735784	chr4	189735923	-161	DEL	3	1	1	0	0	0
chr5_43098_chr5_43104_+-	chr5	43098	chr5	43104	87	INS	2	1	1	0	0	0
chr5_72985_chr5_73527_-+	chr5	72985	chr5	73527	540	DUP	2	1	0	0	1	0
chr5_89108_chr5_89177_+-	chr5	89108	chr5	89177	-69	DEL	15	1	1	0	1	0
chr5_318189_chr5_318240_+-	chr5	318189	chr5	318240	-51	DEL	3	1	1	0	0	0
chr5_344543_chr5_344628_+-	chr5	344543	chr5	344628	-88	DEL	3	1	1	0	0	0
chr5_356597_chr5_356699_+-	chr5	356597	chr5	356699	-143	DEL	2	1	1	0	0	0
chr5_467431_chr5_467493_++	chr5	467431	chr5	467493	-77	DEL	2	1	1	0	0	0
chr5_467755_chr5_468402_++	chr5	467755	chr5	468402	-641	DEL	3	1	1	0	0	0
chr5_486864_chr5_486892_+-	chr5	486864	chr5	486892	-88	DEL	3	1	1	0	0	0
chr5_505363_chr5_505442_+-	chr5	505363	chr5	505442	-77	DEL	2	1	1	0	0	0
chr5_505497_chr5_505498_+-	chr5	505497	chr5	505498	381	INS	2	1	1	0	0	0
chr5_554928_chr5_554943_+-	chr5	554928	chr5	554943	688	INS	3	1	1	0	0	0
chr5_562735_chr5_562946_++	chr5	562735	chr5	562946	-210	DEL	2	1	1	0	0	0
chr5_563260_chr5_563536_+-	chr5	563260	chr5	563536	-267	DEL	2	1	1	0	0	0
chr5_634948_chr5_635176_+-	chr5	634948	chr5	635176	-228	DEL	31	0	1	0	1	0
chr5_689546_chr5_689547_+-	chr5	689546	chr5	689547	59	INS	2	1	1	0	0	0
chr5_759331_chr5_759397_+-	chr5	759331	chr5	759397	-66	DEL	13	1	1	0	1	0
chr5_838839_chr5_838840_+-	chr5	838839	chr5	838840	78	INS	2	1	1	0	0	0
chr5_841316_chr5_841381_+-	chr5	841316	chr5	841381	-69	DEL	2	1	1	0	0	0
chr5_1024850_chr5_1025249_+-	chr5	1024850	chr5	1025249	-388	DEL	2	1	1	0	0	0
chr5_1063642_chr5_1063749_+-	chr5	1063642	chr5	1063749	-108	DEL	2	1	1	0	0	0
chr5_1096743_chr5_1096823_+-	chr5	1096743	chr5	1096823	-80	DEL	2	1	1	0	0	0
chr5_1098166_chr5_1098439_-+	chr5	1098166	chr5	1098439	227	DUP	2	0	1	0	1	0
chr5_1170378_chr5_1170582_++	chr5	1170378	chr5	1170582	-205	DEL	2	1	1	0	0	0
chr5_1238411_chr5_1238412_+-	chr5	1238411	chr5	1238412	84	INS	2	1	1	0	0	0
chr5_1307427_chr5_1307427_+-	chr5	1307427	chr5	1307427	92	INS	3	1	1	0	0	0
chr5_1459008_chr5_1459090_+-	chr5	1459008	chr5	1459090	-82	DEL	2	1	1	0	0	0
chr5_1483848_chr5_1483850_+-	chr5	1483848	chr5	1483850	98	INS	2	1	1	0	0	0
chr5_1543375_chr5_1543376_+-	chr5	1543375	chr5	1543376	152	INS	2	1	1	0	0	0
chr5_1645658_chr5_1645658_+-	chr5	1645658	chr5	1645658	838	INS	2	1	1	0	0	0
chr5_2082578_chr5_2082578_+-	chr5	2082578	chr5	2082578	370	INS	3	1	1	0	0	0
chr5_2490805_chr5_2490806_+-	chr5	2490805	chr5	2490806	660	INS	2	1	1	0	0	0
chr5_2490840_chr5_2490948_+-	chr5	2490840	chr5	2490948	150	INS	3	1	1	0	0	0
chr5_3383814_chr5_3383814_+-	chr5	3383814	chr5	3383814	139	INS	2	1	1	0	0	0
chr5_5132327_chr5_5132330_+-	chr5	5132327	chr5	5132330	52	INS	3	1	1	0	0	0
chr5_5318480_chr5_5321894_+-	chr5	5318480	chr5	5321894	-3414	DEL	34	1	1	0	1	0
chr5_5774803_chr5_5774932_+-	chr5	5774803	chr5	5774932	-149	DEL	2	1	1	0	0	0
chr5_6313842_chr5_6313842_+-	chr5	6313842	chr5	6313842	92	INS	2	1	1	0	0	0
chr5_6589904_chr5_6589905_+-	chr5	6589904	chr5	6589905	107	INS	2	1	1	0	0	0
chr5_6670774_chr5_6670963_+-	chr5	6670774	chr5	6670963	-188	DEL	36	1	1	0	1	0
chr5_6676280_chr5_6676516_+-	chr5	6676280	chr5	6676516	-236	DEL	36	1	1	0	1	0
chr5_7924009_chr4_60336_+-	chr5	7924009	chr4	60336	0	TRA	26	1	0	0	1	1
chr5_10638962_chr5_10640104_++	chr5	10638962	chr5	10640104	-1145	DEL	2	1	1	0	0	0
chr5_13742908_chr5_13871952_-+	chr5	13742908	chr5	13871952	129040	DUP	32	0	0	0	1	1
chr5_13951167_chr5_13951235_+-	chr5	13951167	chr5	13951235	-67	DEL	10	1	1	0	1	0
chr5_14634470_chr5_14634733_-+	chr5	14634470	chr5	14634733	231	DUP	2	0	1	0	1	0
chr5_15069934_chr5_15073514_-+	chr5	15069934	chr5	15073514	3582	DUP	36	1	1	0	1	0
chr5_16524844_chr5_16524845_+-	chr5	16524844	chr5	16524845	53	INS	2	1	1	0	0	0
chr5_17812198_chr5_17812224_+-	chr5	17812198	chr5	17812224	699	INS	3	1	1	0	0	0
chr5_17883916_chr5_17883917_+-	chr5	17883916	chr5	17883917	72	INS	3	1	1	0	0	0
chr5_17943014_chr5_17943071_++	chr5	17943014	chr5	17943071	-55	DEL	2	1	1	0	0	0
chr5_19709576_chr5_19709802_+-	chr5	19709576	chr5	19709802	-203	DEL	15	1	1	0	1	0
chr5_26094032_chr5_26094033_+-	chr5	26094032	chr5	26094033	86	INS	2	1	1	0	0	0
chr5_29346608_chr5_29346660_++	chr5	29346608	chr5	29346660	-52	DEL	2	1	1	0	0	0
chr5_29743661_chr5_29743662_+-	chr5	29743661	chr5	29743662	68	INS	2	1	1	0	0	0
chr5_33797441_chr5_33797444_+-	chr5	33797441	chr5	33797444	6004	INS	3	1	1	0	0	0
chr5_38253091_chr10_44898813_++	chr5	38253091	chr10	44898813	0	TRA	39	1	1	0	1	1
chr5_38832072_chr5_38832098_+-	chr5	38832072	chr5	38832098	208	INS	3	1	1	0	0	0
chr5_38990713_chr5_38990713_+-	chr5	38990713	chr5	38990713	71	INS	2	1	1	0	0	0
chr5_41602249_chr5_41603252_+-	chr5	41602249	chr5	41603252	-1003	DEL	26	1	1	0	1	0
chr5_42981407_chr5_42981867_++	chr5	42981407	chr5	42981867	-461	DEL	2	1	1	0	0	0
chr5_43356135_chr5_43357013_-+	chr5	43356135	chr5	43357013	878	DUP	34	0	1	0	1	0
chr5_50130955_chr5_50130955_+-	chr5	50130955	chr5	50130955	334	INS	3	1	1	0	0	0
chr5_52621620_chr5_52638029_+-	chr5	52621620	chr5	52638029	-16409	DEL	36	1	1	0	1	0
chr5_53091722_chr5_53091910_+-	chr5	53091722	chr5	53091910	-188	DEL	36	1	1	0	1	0
chr5_53523443_chr5_53523443_+-	chr5	53523443	chr5	53523443	55	INS	2	1	1	0	0	0
chr5_55141757_chr22_27620290_-+	chr5	55141757	chr22	27620290	0	TRA	19	0	1	0	1	0
chr5_55151427_chr5_55151623_-+	chr5	55151427	chr5	55151623	-196	DEL	11	0	1	0	1	0
chr5_55696694_chr5_55696694_+-	chr5	55696694	chr5	55696694	222	INS	3	1	1	0	0	0
chr5_57525828_chr5_57590594_-+	chr5	57525828	chr5	57590594	64743	DUP	38	1	0	0	1	1
chr5_60690663_chr5_60690726_+-	chr5	60690663	chr5	60690726	-63	DEL	9	1	0	0	1	0
chr5_61684021_chr5_61684021_+-	chr5	61684021	chr5	61684021	268	INS	3	1	1	0	0	0
chr5_67273184_chr5_67276733_-+	chr5	67273184	chr5	67276733	3549	DUP	36	1	1	0	1	0
chr5_77794887_chr5_77794888_+-	chr5	77794887	chr5	77794888	127	INS	2	1	1	0	0	0
chr5_79137040_chr5_79137041_+-	chr5	79137040	chr5	79137041	52	INS	2	1	1	0	0	0
chr5_79270350_chr5_79270407_+-	chr5	79270350	chr5	79270407	-56	DEL	3	1	1	0	0	0
chr5_80693352_chr5_80693353_+-	chr5	80693352	chr5	80693353	287	INS	2	1	1	0	0	0
chr5_81467541_chr5_81469799_-+	chr5	81467541	chr5	81469799	2257	DUP	35	0	1	0	1	0
chr5_88125445_chr5_88126664_+-	chr5	88125445	chr5	88126664	-1219	DEL	35	1	1	0	1	0
chr5_91813214_chr5_91813266_+-	chr5	91813214	chr5	91813266	-52	DEL	15	1	1	0	1	0
chr5_96079441_chr5_96180299_+-	chr5	96079441	chr5	96180299	100831	DUP	11	0	0	0	1	1
chr5_96896947_chr5_96896948_+-	chr5	96896947	chr5	96896948	103	INS	2	1	1	0	0	0
chr5_99060171_chr5_99060226_+-	chr5	99060171	chr5	99060226	-55	DEL	8	0	1	0	1	0
chr5_100493028_chr5_100493080_++	chr5	100493028	chr5	100493080	-55	DEL	2	1	1	0	0	0
chr5_104025034_chr5_104025035_+-	chr5	104025034	chr5	104025035	57	INS	2	1	1	0	0	0
chr5_104666613_chr5_104666613_+-	chr5	104666613	chr5	104666613	67	INS	3	1	1	0	0	0
chr5_105589292_chr5_105589360_+-	chr5	105589292	chr5	105589360	-69	DEL	2	1	1	0	0	0
chr5_105750762_chr5_105750868_+-	chr5	105750762	chr5	105750868	-107	DEL	2	1	1	0	0	0
chr5_106599669_chr5_106599669_+-	chr5	106599669	chr5	106599669	6017	INS	2	1	1	0	0	0
chr5_107868809_chr5_108041908_+-	chr5	107868809	chr5	108041908	-173097	DEL	55	1	0	0	1	1
chr5_108609915_chr5_108609916_+-	chr5	108609915	chr5	108609916	57	INS	2	1	1	0	0	0
chr5_114046528_chr5_114046529_+-	chr5	114046528	chr5	114046529	112	INS	2	1	1	0	0	0
chr5_118465835_chr5_118465890_++	chr5	118465835	chr5	118465890	-56	DEL	2	1	1	0	0	0
chr5_125404959_chr5_125405076_+-	chr5	125404959	chr5	125405076	-119	DEL	25	1	1	0	1	0
chr5_126786223_chr5_126798435_-+	chr5	126786223	chr5	126798435	-12214	DEL	37	1	1	0	1	0
chr5_127502123_chr5_127503805_+-	chr5	127502123	chr5	127503805	-1682	DEL	37	1	1	0	1	0
chr5_128539785_chr5_128539786_+-	chr5	128539785	chr5	128539786	649	INS	2	1	1	0	0	0
chr5_129549826_chr5_129549909_+-	chr5	129549826	chr5	129549909	-84	DEL	2	1	1	0	0	0
chr5_130215940_chr5_130216004_+-	chr5	130215940	chr5	130216004	-64	DEL	15	1	1	0	1	0
chr5_132818186_chr5_132874984_-+	chr5	132818186	chr5	132874984	56802	DUP	46	1	1	0	1	1
chr5_134406284_chr5_134414320_-+	chr5	134406284	chr5	134414320	8036	DUP	36	1	1	0	1	0
chr5_139276243_chr12_6943885_++	chr5	139276243	chr12	6943885	0	TRA	40	1	1	0	1	1
chr5_142351969_chr5_142351970_+-	chr5	142351969	chr5	142351970	112	INS	2	1	1	0	0	0
chr5_143914286_chr5_143979425_-+	chr5	143914286	chr5	143979425	65134	DUP	7	0	0	0	1	1
chr5_146838715_chr5_146842861_-+	chr5	146838715	chr5	146842861	4146	DUP	36	1	1	0	1	0
chr5_150494285_chr5_150494354_+-	chr5	150494285	chr5	150494354	-69	DEL	3	0	1	0	1	0
chr5_153199478_chr5_153199538_+-	chr5	153199478	chr5	153199538	-60	DEL	13	1	1	0	1	0
chr5_155612016_chr5_155612069_+-	chr5	155612016	chr5	155612069	-53	DEL	10	1	0	0	1	0
chr5_167427707_chr5_167427708_+-	chr5	167427707	chr5	167427708	334	INS	2	1	1	0	0	0
chr5_172069036_chr5_172085679_-+	chr5	172069036	chr5	172085679	16643	DUP	33	1	1	0	1	0
chr5_173735921_chr5_173735922_+-	chr5	173735921	chr5	173735922	92	INS	2	1	1	0	0	0
chr5_174320846_chr5_174320859_+-	chr5	174320846	chr5	174320859	145	INS	3	1	1	0	0	0
chr5_176591689_chr5_176591690_+-	chr5	176591689	chr5	176591690	55	INS	2	1	1	0	0	0
chr5_176638427_chr5_176665654_+-	chr5	176638427	chr5	176665654	27227	DUP	12	0	1	0	1	0
chr5_178182527_chr5_178182652_+-	chr5	178182527	chr5	178182652	-126	DEL	25	1	1	0	1	0
chr5_178547962_chr5_178547992_+-	chr5	178547962	chr5	178547992	80	INS	3	1	1	0	0	0
chr5_179374569_chr5_179374570_+-	chr5	179374569	chr5	179374570	263	INS	2	1	1	0	0	0
chr5_179411935_chr5_179412442_++	chr5	179411935	chr5	179412442	-541	DEL	2	1	1	0	0	0
chr5_180507859_chr5_180507864_+-	chr5	180507859	chr5	180507864	247	INS	3	1	1	0	0	0
chr5_180615339_chr5_180615398_+-	chr5	180615339	chr5	180615398	-62	DEL	3	1	1	0	0	0
chr5_180635488_chr5_180635653_++	chr5	180635488	chr5	180635653	-140	DEL	2	1	1	0	0	0
chr5_181046239_chr5_181046240_+-	chr5	181046239	chr5	181046240	208	INS	2	1	1	0	0	0
chr6_62925117_chr18_76939084_++	chr6	62925117	chr18	76939084	0	TRA	30	1	0	0	1	1
chr6_63200099_chr6_63200151_+-	chr6	63200099	chr6	63200151	-52	DEL	13	1	1	0	1	0
chr6_63547282_chr6_63547387_-+	chr6	63547282	chr6	63547387	-105	DEL	8	1	1	0	1	0
chr6_66967824_chr6_66974569_+-	chr6	66967824	chr6	66974569	-6745	DEL	37	1	1	0	1	0
chr6_69531484_chr6_69533119_++	chr6	69531484	chr6	69533119	1633	INV	35	0	1	0	1	0
chr6_70360523_chr6_70361324_+-	chr6	70360523	chr6	70361324	-801	DEL	28	1	1	0	1	0
chr6_70468369_chr6_70478760_++	chr6	70468369	chr6	70478760	10388	INV	33	0	1	0	1	0
chr6_70608881_chr6_70610128_++	chr6	70608881	chr6	70610128	1244	INV	32	0	1	0	1	0
chr6_70726283_chr6_70729517_++	chr6	70726283	chr6	70729517	3228	INV	43	1	1	0	1	0
chr6_70981206_chr6_70981304_++	chr6	70981206	chr6	70981304	-97	DEL	2	1	1	0	0	0
chr6_71295290_chr6_71305264_++	chr6	71295290	chr6	71305264	9969	INV	35	0	1	0	1	0
chr6_71792907_chr6_71794108_++	chr6	71792907	chr6	71794108	-1193	DEL	33	0	1	0	1	0
chr6_72002478_chr6_96386157_++	chr6	72002478	chr6	96386157	24383712	INV	50	1	0	1	1	1
chr6_72060267_chr6_72637249_-+	chr6	72060267	chr6	72637249	576987	DUP	55	1	0	0	1	1
chr6_72099167_chr6_72099221_+-	chr6	72099167	chr6	72099221	-54	DEL	13	1	1	0	1	0
chr6_72637250_chr6_72060265_++	chr6	72637250	chr6	72060265	576984	INV	10	1	0	0	0	1
chr6_72941666_chr6_72941726_+-	chr6	72941666	chr6	72941726	-63	DEL	2	1	1	0	0	0
chr6_73159494_chr6_73161285_++	chr6	73159494	chr6	73161285	1791	INV	35	0	1	0	1	0
chr6_73180973_chr4_139418181_--	chr6	73180973	chr4	139418181	0	TRA	38	1	0	0	1	1
chr6_7331098_chr15_74968971_++	chr6	7331098	chr15	74968971	0	TRA	19	0	1	0	1	0
chr6_7331149_chr17_39137646_--	chr6	7331149	chr17	39137646	0	TRA	15	0	1	0	1	0
chr6_75359276_chr6_75359338_+-	chr6	75359276	chr6	75359338	-62	DEL	13	1	1	0	1	0
chr6_77449940_chr6_115803990_+-	chr6	77449940	chr6	115803990	38353961	INV	50	0	1	1	1	1
chr6_78440588_chr6_101318112_-+	chr6	78440588	chr6	101318112	22877509	DUP	50	1	1	1	1	1
chr6_81198798_chr6_81215167_-+	chr6	81198798	chr6	81215167	16369	DUP	35	0	1	0	1	0
chr6_84216275_chr3_169263283_+-	chr6	84216275	chr3	169263283	0	TRA	39	1	0	0	1	1
chr6_86719474_chr6_95806551_++	chr6	86719474	chr6	95806551	9087073	INV	46	1	1	0	1	1
chr6_86724513_chr6_98410096_-+	chr6	86724513	chr6	98410096	11685745	DUP	40	0	1	1	1	1
chr6_8742219_chr19_11983341_++	chr6	8742219	chr19	11983341	0	TRA	44	1	1	0	1	1
chr6_88844792_chr1_84446212_--	chr6	88844792	chr1	84446212	0	TRA	37	1	0	0	1	1
chr6_90088089_chr6_105846475_+-	chr6	90088089	chr6	105846475	-15758308	DEL	52	1	1	1	1	1
chr6_94187000_chr6_94305714_+-	chr6	94187000	chr6	94305714	-118713	DEL	44	0	0	0	1	1
chr6_94313711_chr6_115452607_++	chr6	94313711	chr6	115452607	21138897	INV	45	1	1	0	1	1
chr6_95756209_chr6_101781908_++	chr6	95756209	chr6	101781908	6025699	INV	50	1	1	0	1	1
chr6_97412948_chr6_120415542_-+	chr6	97412948	chr6	120415542	23002588	DUP	44	0	1	0	1	1
chr6_98392723_chr6_115813848_-+	chr6	98392723	chr6	115813848	17421050	DUP	37	1	1	0	1	1
chr6_98407824_chr6_123184476_-+	chr6	98407824	chr6	123184476	24776681	DUP	55	1	1	1	1	1
chr6_100465484_chr6_100516023_-+	chr6	100465484	chr6	100516023	50540	DUP	25	0	0	0	1	1
chr6_101337346_chr6_101337417_+-	chr6	101337346	chr6	101337417	-71	DEL	15	1	1	0	1	0
chr6_101379087_chr6_101890285_-+	chr6	101379087	chr6	101890285	511199	DUP	47	1	1	0	1	1
chr6_101390966_chr6_101803973_++	chr6	101390966	chr6	101803973	413006	INV	36	1	1	0	1	0
chr6_101816129_chr6_103414879_-+	chr6	101816129	chr6	103414879	1598751	DUP	34	1	1	0	1	0
chr6_105846463_chr6_90088106_++	chr6	105846463	chr6	90088106	15758382	INV	9	1	0	0	0	1
chr6_106354503_chr6_106362128_+-	chr6	106354503	chr6	106362128	-7700	DEL	13	1	1	0	1	0
chr6_107000693_chr6_107000693_+-	chr6	107000693	chr6	107000693	2852	INS	3	1	1	0	0	0
chr6_111302259_chr6_111307175_-+	chr6	111302259	chr6	111307175	4916	DUP	36	1	1	0	1	0
chr6_115429513_chr6_122160087_++	chr6	115429513	chr6	122160087	6730577	INV	47	1	1	0	1	1
chr6_115813851_chr6_98392724_++	chr6	115813851	chr6	98392724	17421122	INV	5	1	0	0	0	1
chr6_115887815_chr6_122171274_-+	chr6	115887815	chr6	122171274	6283455	DUP	42	0	0	0	1	1
chr6_116884096_chr6_116884233_-+	chr6	116884096	chr6	116884233	-138	DEL	26	1	1	0	1	0
chr6_117923681_chr6_117923723_+-	chr6	117923681	chr6	117923723	297	INS	3	1	1	0	0	0
chr6_117924472_chr6_117924472_+-	chr6	117924472	chr6	117924472	61	INS	2	1	1	0	0	0
chr6_120775994_chr6_120776047_+-	chr6	120775994	chr6	120776047	-53	DEL	13	1	1	0	1	0
chr6_120776369_chr6_120776426_+-	chr6	120776369	chr6	120776426	-57	DEL	10	1	1	0	1	0
chr6_122390323_chr6_122390386_+-	chr6	122390323	chr6	122390386	-64	DEL	5	0	1	0	1	0
chr6_123184489_chr6_98407808_++	chr6	123184489	chr6	98407808	24776665	INV	8	1	0	0	0	1
chr6_123266457_chr6_123266458_+-	chr6	123266457	chr6	123266458	84	INS	2	1	1	0	0	0
chr6_129298073_chr6_129298073_+-	chr6	129298073	chr6	129298073	82	INS	2	1	1	0	0	0
chr6_131271283_chr6_131280048_-+	chr6	131271283	chr6	131280048	8764	DUP	36	1	1	0	1	0
chr6_134907449_chr6_134907559_++	chr6	134907449	chr6	134907559	-115	DEL	2	1	1	0	0	0
chr6_136285028_chr6_136285028_+-	chr6	136285028	chr6	136285028	291	INS	3	1	1	0	0	0
chr6_137199528_chr6_137199528_+-	chr6	137199528	chr6	137199528	109	INS	4	1	1	0	0	0
chr6_144946839_chr6_144946959_-+	chr6	144946839	chr6	144946959	-120	DEL	26	1	1	0	1	0
chr6_148580351_chr6_148588113_-+	chr6	148580351	chr6	148588113	7763	DUP	36	1	1	0	1	0
chr6_149189616_chr6_149189688_+-	chr6	149189616	chr6	149189688	-72	DEL	15	1	1	0	1	0
chr6_151459912_chr6_151460077_+-	chr6	151459912	chr6	151460077	-165	DEL	37	1	1	0	1	0
chr6_155219059_chr6_155219059_+-	chr6	155219059	chr6	155219059	88	INS	2	1	1	0	0	0
chr6_156876266_chr6_156882327_-+	chr6	156876266	chr6	156882327	6061	DUP	36	1	1	0	1	0
chr6_157147239_chr6_157147258_+-	chr6	157147239	chr6	157147258	832	INS	3	1	1	0	0	0
chr6_157549688_chr6_157552798_-+	chr6	157549688	chr6	157552798	3110	DUP	35	0	1	0	1	0
chr6_159763969_chr6_159764137_+-	chr6	159763969	chr6	159764137	-166	DEL	8	0	1	0	1	0
chr6_161265267_chr6_161265268_+-	chr6	161265267	chr6	161265268	58	INS	2	1	1	0	0	0
chr6_161361685_chr7_23514789_++	chr6	161361685	chr7	23514789	0	TRA	49	1	1	0	1	1
chr6_166288700_chr6_166288700_+-	chr6	166288700	chr6	166288700	5526	INS	3	1	1	0	0	0
chr6_167089241_chr6_167089296_+-	chr6	167089241	chr6	167089296	-55	DEL	14	1	1	0	1	0
chr6_168356364_chr6_168356682_+-	chr6	168356364	chr6	168356682	-318	DEL	27	1	1	0	1	0
chr6_168561955_chr6_168562107_++	chr6	168561955	chr6	168562107	-152	DEL	2	1	1	0	0	0
chr6_168562373_chr6_168562427_+-	chr6	168562373	chr6	168562427	-53	DEL	2	1	1	0	0	0
chr6_168695904_chr6_168696064_+-	chr6	168695904	chr6	168696064	-159	DEL	36	1	1	0	1	0
chr6_169196884_chr6_169196885_+-	chr6	169196884	chr6	169196885	194	INS	2	1	1	0	0	0
chr6_169242634_chr6_169242635_+-	chr6	169242634	chr6	169242635	721	INS	2	1	1	0	0	0
chr6_169425657_chr6_169425658_+-	chr6	169425657	chr6	169425658	228	INS	2	1	1	0	0	0
chr6_169808264_chr6_169808332_+-	chr6	169808264	chr6	169808332	-62	DEL	2	1	1	0	0	0
chr6_169975972_chr6_169975974_+-	chr6	169975972	chr6	169975974	74	INS	3	1	1	0	0	0
chr6_170494979_chr6_170495098_++	chr6	170494979	chr6	170495098	-121	DEL	2	1	1	0	0	0
chr6_170502575_chr6_170502828_+-	chr6	170502575	chr6	170502828	-247	DEL	2	1	1	0	0	0
chr6_170507948_chr6_170507949_+-	chr6	170507948	chr6	170507949	394	INS	2	1	1	0	0	0
chr6_170712200_chr6_170712305_++	chr6	170712200	chr6	170712305	-104	DEL	3	1	1	0	0	0
chr7_206512_chr7_206512_+-	chr7	206512	chr7	206512	54	INS	2	1	1	0	0	0
chr7_636254_chr7_636255_+-	chr7	636254	chr7	636255	95	INS	2	1	1	0	0	0
chr7_739078_chr7_739145_+-	chr7	739078	chr7	739145	-68	DEL	2	1	1	0	0	0
chr7_919788_chr7_919800_+-	chr7	919788	chr7	919800	188	INS	4	1	1	0	0	0
chr7_1754737_chr7_1754752_+-	chr7	1754737	chr7	1754752	78	INS	3	1	1	0	0	0
chr7_1940962_chr7_1940962_+-	chr7	1940962	chr7	1940962	82	INS	3	1	1	0	0	0
chr7_2268884_chr7_2268885_+-	chr7	2268884	chr7	2268885	122	INS	2	1	1	0	0	0
chr7_2377485_chr7_2377548_+-	chr7	2377485	chr7	2377548	-63	DEL	2	1	1	0	0	0
chr7_2494015_chr7_2494069_+-	chr7	2494015	chr7	2494069	-53	DEL	3	1	1	0	0	0
chr7_3977123_chr7_3977289_++	chr7	3977123	chr7	3977289	-168	DEL	2	1	1	0	0	0
chr7_4969064_chr10_101368025_++	chr7	4969064	chr10	101368025	0	TRA	32	0	1	0	1	0
chr7_6421477_chr7_6421478_+-	chr7	6421477	chr7	6421478	72	INS	2	1	1	0	0	0
chr7_6797862_chr7_6797866_+-	chr7	6797862	chr7	6797866	75	INS	4	1	1	0	0	0
chr7_8509801_chr7_8516194_-+	chr7	8509801	chr7	8516194	6393	DUP	36	1	1	0	1	0
chr7_10390759_chr14_101098623_++	chr7	10390759	chr14	101098623	0	TRA	41	1	1	0	1	1
chr7_15813853_chr7_15813854_+-	chr7	15813853	chr7	15813854	106	INS	2	1	1	0	0	0
chr7_16789867_chr7_16789944_+-	chr7	16789867	chr7	16789944	-83	DEL	2	1	1	0	0	0
chr7_17023539_chr7_17173627_-+	chr7	17023539	chr7	17173627	150082	DUP	32	0	0	0	1	1
chr7_17493885_chr7_17494420_+-	chr7	17493885	chr7	17494420	-536	DEL	37	1	1	0	1	0
chr7_19403295_chr7_19408849_-+	chr7	19403295	chr7	19408849	5554	DUP	36	1	1	0	1	0
chr7_19766180_chr15_67327517_++	chr7	19766180	chr15	67327517	0	TRA	29	0	0	0	1	1
chr7_21961432_chr8_115742901_++	chr7	21961432	chr8	115742901	0	TRA	27	0	1	0	1	1
chr7_25976548_chrX_3582684_++	chr7	25976548	chrX	3582684	0	TRA	55	1	1	0	1	1
chr7_26953184_chr7_26953286_-+	chr7	26953184	chr7	26953286	-104	DEL	26	1	1	0	1	0
chr7_33074025_chr7_33074095_+-	chr7	33074025	chr7	33074095	-69	DEL	8	0	1	0	1	0
chr7_35044390_chr7_35044650_++	chr7	35044390	chr7	35044650	-250	DEL	2	1	1	0	0	0
chr7_38443450_chr7_38446680_-+	chr7	38443450	chr7	38446680	3230	DUP	35	0	1	0	1	0
chr7_38975161_chr7_38978711_+-	chr7	38975161	chr7	38978711	-3541	DEL	34	1	0	0	1	0
chr7_40422830_chr7_43283188_++	chr7	40422830	chr7	43283188	2862787	INV	34	0	1	0	1	1
chr7_41449590_chr7_41450258_+-	chr7	41449590	chr7	41450258	-668	DEL	31	1	0	0	1	0
chr7_42289883_chr7_42289976_+-	chr7	42289883	chr7	42289976	-93	DEL	15	1	1	0	1	0
chr7_43731296_chr7_43731297_+-	chr7	43731296	chr7	43731297	168	INS	2	1	1	0	0	0
chr7_44555960_chr7_54025138_+-	chr7	44555960	chr7	54025138	9468850	DUP	44	1	1	0	1	0
chr7_46241018_chr7_46241129_+-	chr7	46241018	chr7	46241129	-112	DEL	26	1	1	0	1	0
chr7_52159064_chr7_52159065_+-	chr7	52159064	chr7	52159065	68	INS	2	1	1	0	0	0
chr7_53584824_chr7_53584824_+-	chr7	53584824	chr7	53584824	6051	INS	3	1	1	0	0	0
chr7_54025227_chr7_44557345_++	chr7	54025227	chr7	44557345	9467996	INV	12	1	0	0	1	0
chr7_54234014_chr7_54324271_++	chr7	54234014	chr7	54324271	92335	INV	3	0	1	0	0	1
chr7_54618433_chr7_54621260_-+	chr7	54618433	chr7	54621260	2715	DUP	3	1	0	0	1	0
chr7_54618592_chr10_37277919_++	chr7	54618592	chr10	37277919	0	TRA	29	0	1	0	1	0
chr7_54749379_chr7_54749379_+-	chr7	54749379	chr7	54749379	95	INS	2	1	1	0	0	0
chr7_56013039_chr7_56013040_+-	chr7	56013039	chr7	56013040	90	INS	2	1	1	0	0	0
chr7_57153347_chr7_57334015_-+	chr7	57153347	chr7	57334015	180002	DUP	56	1	0	0	1	1
chr7_57330126_chr7_57153341_++	chr7	57330126	chr7	57153341	177138	INV	11	1	0	0	0	1
chr7_57330132_chr7_57335240_++	chr7	57330132	chr7	57335240	5108	INV	36	1	1	0	1	0
chr7_57512951_chr7_57519418_++	chr7	57512951	chr7	57519418	6470	INV	35	1	1	0	1	0
chr7_61072169_chr7_61072346_+-	chr7	61072169	chr7	61072346	-177	DEL	2	1	1	0	0	0
chr7_61117752_chr7_61118098_++	chr7	61117752	chr7	61118098	-344	DEL	2	1	1	0	0	0
chr7_61257503_chr7_61257842_++	chr7	61257503	chr7	61257842	-342	DEL	2	1	1	0	0	0
chr7_61291774_chr7_61291774_+-	chr7	61291774	chr7	61291774	746	INS	3	1	1	0	0	0
chr7_64608185_chr7_64608257_+-	chr7	64608185	chr7	64608257	-72	DEL	12	1	0	0	1	0
chr7_66416026_chr7_66431466_-+	chr7	66416026	chr7	66431466	15509	DUP	24	1	1	0	1	0
chr7_66433859_chr1_95996222_--	chr7	66433859	chr1	95996222	0	TRA	29	1	0	0	1	1
chr7_70586261_chr7_70638549_++	chr7	70586261	chr7	70638549	52126	INV	2	0	1	0	0	1
chr7_70888247_chr7_70888301_++	chr7	70888247	chr7	70888301	-53	DEL	2	1	1	0	0	0
chr7_72209316_chr7_72209316_+-	chr7	72209316	chr7	72209316	1357	INS	3	1	1	0	0	0
chr7_74185865_chr7_74186252_+-	chr7	74185865	chr7	74186252	-385	DEL	35	1	1	0	1	0
chr7_74414113_chr7_74416932_++	chr7	74414113	chr7	74416932	-2814	DEL	2	1	1	0	0	0
chr7_75455407_chr13_49008885_++	chr7	75455407	chr13	49008885	0	TRA	18	1	1	0	1	1
chr7_75508166_chr7_75508502_-+	chr7	75508166	chr7	75508502	-337	DEL	19	0	1	0	1	0
chr7_76341108_chr7_76352764_+-	chr7	76341108	chr7	76352764	-11350	DEL	36	1	1	0	1	0
chr7_76499142_chr7_76499142_+-	chr7	76499142	chr7	76499142	1300	INS	2	1	1	0	0	0
chr7_77311247_chr7_77323235_+-	chr7	77311247	chr7	77323235	-11987	DEL	37	1	1	0	1	0
chr7_77509890_chr7_77509905_+-	chr7	77509890	chr7	77509905	299	INS	2	1	1	0	0	0
chr7_77533982_chr7_77533982_+-	chr7	77533982	chr7	77533982	164	INS	2	1	1	0	0	0
chr7_81428357_chr7_81506314_-+	chr7	81428357	chr7	81506314	77962	DUP	44	0	0	0	1	1
chr7_84086546_chr7_84086546_+-	chr7	84086546	chr7	84086546	80	INS	3	1	1	0	0	0
chr7_85412631_chr7_85415779_-+	chr7	85412631	chr7	85415779	3148	DUP	34	0	1	0	1	0
chr7_88741671_chr7_88742341_+-	chr7	88741671	chr7	88742341	-670	DEL	37	1	1	0	1	0
chr7_89924858_chr7_89925011_+-	chr7	89924858	chr7	89925011	-149	DEL	2	1	1	0	0	0
chr7_90344264_chr7_90344265_+-	chr7	90344264	chr7	90344265	55	INS	2	1	1	0	0	0
chr7_95030399_chr7_95030463_+-	chr7	95030399	chr7	95030463	-64	DEL	13	1	1	0	1	0
chr7_97894786_chr7_97895424_+-	chr7	97894786	chr7	97895424	-638	DEL	18	1	1	0	1	0
chr7_98242994_chr7_98242994_+-	chr7	98242994	chr7	98242994	350	INS	3	1	1	0	0	0
chr7_99041399_chr7_99041913_+-	chr7	99041399	chr7	99041913	-513	DEL	36	1	1	0	1	0
chr7_100804479_chr7_100808123_-+	chr7	100804479	chr7	100808123	3644	DUP	35	0	1	0	1	0
chr7_101003687_chr7_101004261_++	chr7	101003687	chr7	101004261	-574	DEL	2	1	1	0	0	0
chr7_101434169_chr7_101434170_+-	chr7	101434169	chr7	101434170	65	INS	2	1	1	0	0	0
chr7_102081266_chr7_102083659_++	chr7	102081266	chr7	102083659	-2862	DEL	2	1	1	0	0	0
chr7_102084328_chr7_102084758_+-	chr7	102084328	chr7	102084758	-435	DEL	2	1	1	0	0	0
chr7_102589920_chr7_102589920_+-	chr7	102589920	chr7	102589920	60	INS	2	1	1	0	0	0
chr7_102595262_chr7_102687751_++	chr7	102595262	chr7	102687751	-94199	DEL	2	1	1	0	0	0
chr7_104913362_chr7_105093758_-+	chr7	104913362	chr7	105093758	180395	DUP	46	0	0	0	1	1
chr7_105124665_chr7_105124853_+-	chr7	105124665	chr7	105124853	-184	DEL	8	1	1	0	1	0
chr7_105126848_chr7_105134885_-+	chr7	105126848	chr7	105134885	8037	DUP	34	1	0	0	1	0
chr7_106631425_chr7_106631426_+-	chr7	106631425	chr7	106631426	467	INS	2	1	1	0	0	0
chr7_112954604_chr2_84880592_--	chr7	112954604	chr2	84880592	0	TRA	35	1	0	0	1	1
chr7_114291985_chr7_114291985_+-	chr7	114291985	chr7	114291985	123	INS	4	1	1	0	0	0
chr7_116638069_chr7_116638130_++	chr7	116638069	chr7	116638130	57	INV	2	1	1	0	0	0
chr7_116726143_chr7_116726143_+-	chr7	116726143	chr7	116726143	105	INS	2	1	1	0	0	0
chr7_118707043_chr7_118707175_+-	chr7	118707043	chr7	118707175	-133	DEL	15	1	1	0	1	0
chr7_118963305_chr7_119490358_-+	chr7	118963305	chr7	119490358	527054	DUP	24	0	0	0	1	1
chr7_121096166_chr19_16958543_++	chr7	121096166	chr19	16958543	0	TRA	45	1	1	0	1	1
chr7_121412524_chr7_121518780_-+	chr7	121412524	chr7	121518780	106258	DUP	46	1	0	0	1	1
chr7_122272491_chr7_122272507_+-	chr7	122272491	chr7	122272507	-70	DEL	3	1	1	0	0	0
chr7_122626419_chr7_122633592_-+	chr7	122626419	chr7	122633592	7173	DUP	34	1	1	0	1	0
chr7_126370244_chr7_126370388_-+	chr7	126370244	chr7	126370388	-143	DEL	26	1	1	0	1	0
chr7_127259611_chr7_127259612_+-	chr7	127259611	chr7	127259612	55	INS	2	1	1	0	0	0
chr7_129073582_chr7_140709411_++	chr7	129073582	chr7	140709411	11635821	INV	36	1	0	0	1	1
chr7_129125553_chr7_140761001_++	chr7	129125553	chr7	140761001	11635359	INV	15	0	0	0	1	1
chr7_132022446_chr7_132022446_+-	chr7	132022446	chr7	132022446	1544	INS	2	1	1	0	0	0
chr7_132480489_chr7_132480600_+-	chr7	132480489	chr7	132480600	-124	DEL	2	1	1	0	0	0
chr7_132698187_chr7_132698187_+-	chr7	132698187	chr7	132698187	56	INS	3	1	1	0	0	0
chr7_135330585_chr7_135330652_+-	chr7	135330585	chr7	135330652	-68	DEL	2	1	1	0	0	0
chr7_140387809_chr7_140387824_+-	chr7	140387809	chr7	140387824	392	INS	3	1	1	0	0	0
chr7_142514861_chr7_142514861_+-	chr7	142514861	chr7	142514861	293	INS	3	1	1	0	0	0
chr7_142924245_chr7_142924320_++	chr7	142924245	chr7	142924320	-73	DEL	2	1	1	0	0	0
chr7_144590243_chr7_144596884_++	chr7	144590243	chr7	144596884	6637	INV	34	1	0	0	1	0
chr7_146712320_chr7_146712320_+-	chr7	146712320	chr7	146712320	74	INS	4	1	1	0	0	0
chr7_148775221_chr6_36615229_-+	chr7	148775221	chr6	36615229	0	TRA	19	1	0	0	1	0
chr7_150035595_chr7_150035935_-+	chr7	150035595	chr7	150035935	383	DUP	2	0	1	0	1	0
chr7_150042077_chr7_150042240_++	chr7	150042077	chr7	150042240	-163	DEL	2	1	1	0	0	0
chr7_151821024_chr7_151821025_+-	chr7	151821024	chr7	151821025	153	INS	2	1	1	0	0	0
chr7_151894851_chr7_151894938_++	chr7	151894851	chr7	151894938	-86	DEL	2	1	1	0	0	0
chr7_151904561_chr7_151904561_+-	chr7	151904561	chr7	151904561	141	INS	2	1	1	0	0	0
chr7_152317108_chr7_152342233_-+	chr7	152317108	chr7	152342233	25124	DUP	36	1	1	0	1	0
chr7_152448658_chr19_17385426_++	chr7	152448658	chr19	17385426	0	TRA	41	1	0	0	1	1
chr7_152674731_chr7_152674756_+-	chr7	152674731	chr7	152674756	75	INS	2	1	1	0	0	0
chr7_153321003_chr7_153321062_++	chr7	153321003	chr7	153321062	69	INV	2	1	1	0	0	0
chr7_153720095_chr7_153720146_+-	chr7	153720095	chr7	153720146	-51	DEL	2	0	1	0	1	0
chr7_154062976_chr7_154062977_+-	chr7	154062976	chr7	154062977	616	INS	3	0	1	0	1	0
chr7_154063129_chr7_154063130_+-	chr7	154063129	chr7	154063130	76	INS	2	1	1	0	0	0
chr7_154349169_chr7_154352857_-+	chr7	154349169	chr7	154352857	3689	DUP	36	1	1	0	1	0
chr7_154443554_chr7_154443629_+-	chr7	154443554	chr7	154443629	-82	DEL	2	1	1	0	0	0
chr7_154656876_chr7_154656987_+-	chr7	154656876	chr7	154656987	-111	DEL	2	1	1	0	0	0
chr7_154662688_chr7_154664097_++	chr7	154662688	chr7	154664097	1448	INV	2	0	1	0	1	0
chr7_154663867_chr7_154664131_+-	chr7	154663867	chr7	154664131	-242	DEL	2	1	1	0	0	0
chr7_154778649_chr7_154778650_+-	chr7	154778649	chr7	154778650	149	INS	2	1	1	0	0	0
chr7_155118686_chr7_155118740_+-	chr7	155118686	chr7	155118740	-56	DEL	3	1	1	0	0	0
chr7_155367135_chr7_155367135_+-	chr7	155367135	chr7	155367135	74	INS	2	1	1	0	0	0
chr7_155482631_chr7_155482632_+-	chr7	155482631	chr7	155482632	55	INS	2	1	1	0	0	0
chr7_155617388_chr7_155617389_+-	chr7	155617388	chr7	155617389	160	INS	2	1	1	0	0	0
chr7_155934672_chr7_155934782_++	chr7	155934672	chr7	155934782	-107	DEL	2	1	1	0	0	0
chr7_156539625_chr7_156539731_+-	chr7	156539625	chr7	156539731	-121	DEL	2	1	1	0	0	0
chr7_157438059_chr7_157438150_+-	chr7	157438059	chr7	157438150	-94	DEL	2	1	1	0	0	0
chr7_157462018_chr7_157462023_+-	chr7	157462018	chr7	157462023	116	INS	3	1	1	0	0	0
chr7_157647152_chr7_157648192_+-	chr7	157647152	chr7	157648192	-1045	DEL	2	1	1	0	0	0
chr7_157776674_chr7_157776675_+-	chr7	157776674	chr7	157776675	321	INS	2	1	1	0	0	0
chr7_157858326_chr7_157858482_+-	chr7	157858326	chr7	157858482	-186	DEL	2	1	1	0	0	0
chr7_157933799_chr7_157933867_++	chr7	157933799	chr7	157933867	-68	DEL	2	1	1	0	0	0
chr7_157983116_chr7_157983117_+-	chr7	157983116	chr7	157983117	211	INS	2	1	1	0	0	0
chr7_158071943_chr7_158071945_+-	chr7	158071943	chr7	158071945	65	INS	2	1	1	0	0	0
chr7_158151037_chr7_158151509_-+	chr7	158151037	chr7	158151509	467	DUP	2	1	1	0	0	0
chr7_158319647_chr7_158319803_++	chr7	158319647	chr7	158319803	-194	DEL	3	1	1	0	0	0
chr7_158337739_chr7_158338540_+-	chr7	158337739	chr7	158338540	-823	DEL	2	1	1	0	0	0
chr7_158386326_chr7_158386327_+-	chr7	158386326	chr7	158386327	278	INS	2	1	1	0	0	0
chr7_158440892_chr7_158440893_+-	chr7	158440892	chr7	158440893	280	INS	3	1	1	0	0	0
chr7_158460344_chr7_158460413_++	chr7	158460344	chr7	158460413	-71	DEL	2	1	1	0	0	0
chr7_158602454_chr7_158602543_++	chr7	158602454	chr7	158602543	-91	DEL	2	1	1	0	0	0
chr7_158667667_chr7_158667668_+-	chr7	158667667	chr7	158667668	55	INS	2	1	1	0	0	0
chr7_158717491_chr7_158717867_+-	chr7	158717491	chr7	158717867	-358	DEL	2	1	1	0	0	0
chr7_159207014_chr7_159207106_+-	chr7	159207014	chr7	159207106	-83	DEL	2	1	1	0	0	0
chr8_290697_chr8_290753_++	chr8	290697	chr8	290753	-54	DEL	2	1	1	0	0	0
chr8_688275_chr8_688276_+-	chr8	688275	chr8	688276	-83	DEL	2	1	1	0	0	0
chr8_744626_chr8_744627_+-	chr8	744626	chr8	744627	66	INS	2	1	1	0	0	0
chr8_1000456_chr8_1000457_+-	chr8	1000456	chr8	1000457	201	INS	2	1	1	0	0	0
chr8_1164373_chr8_1164374_+-	chr8	1164373	chr8	1164374	134	INS	2	1	1	0	0	0
chr8_1206394_chr8_1206395_+-	chr8	1206394	chr8	1206395	451	INS	2	1	1	0	0	0
chr8_1508517_chr8_1508518_+-	chr8	1508517	chr8	1508518	351	INS	2	1	1	0	0	0
chr8_1955106_chr8_1955107_+-	chr8	1955106	chr8	1955107	149	INS	2	1	1	0	0	0
chr8_2244288_chr8_2244289_+-	chr8	2244288	chr8	2244289	248	INS	2	1	1	0	0	0
chr8_2248352_chr8_2248429_++	chr8	2248352	chr8	2248429	-77	DEL	3	1	1	0	0	0
chr8_3795704_chr8_3796012_+-	chr8	3795704	chr8	3796012	-311	DEL	2	1	1	0	0	0
chr8_5384102_chr8_5384286_++	chr8	5384102	chr8	5384286	-185	DEL	3	1	1	0	0	0
chr8_5384171_chr8_5384249_+-	chr8	5384171	chr8	5384249	-76	DEL	2	1	1	0	0	0
chr8_6377116_chr8_6377116_+-	chr8	6377116	chr8	6377116	80	INS	3	1	1	0	0	0
chr8_9283396_chr8_9283397_+-	chr8	9283396	chr8	9283397	171	INS	2	1	1	0	0	0
chr8_10644721_chr8_10647542_-+	chr8	10644721	chr8	10647542	2821	DUP	35	0	1	0	1	0
chr8_11456237_chr8_11456241_+-	chr8	11456237	chr8	11456241	540	INS	3	1	1	0	0	0
chr8_12146418_chr16_69862296_++	chr8	12146418	chr16	69862296	0	TRA	27	1	0	0	1	0
chr8_17819269_chr8_17819362_+-	chr8	17819269	chr8	17819362	-95	DEL	3	1	1	0	0	0
chr8_21366541_chr8_21368164_+-	chr8	21366541	chr8	21368164	-1623	DEL	37	1	1	0	1	0
chr8_22359472_chr8_22359535_+-	chr8	22359472	chr8	22359535	-63	DEL	9	1	0	0	1	0
chr8_24913695_chr8_24913802_-+	chr8	24913695	chr8	24913802	-109	DEL	26	1	1	0	1	0
chr8_25172128_chr8_25172239_+-	chr8	25172128	chr8	25172239	-108	DEL	2	1	1	0	0	0
chr8_30246700_chr8_30246823_+-	chr8	30246700	chr8	30246823	-124	DEL	2	1	1	0	0	0
chr8_30388586_chr8_30388586_+-	chr8	30388586	chr8	30388586	813	INS	2	1	1	0	0	0
chr8_33059303_chr8_33059354_+-	chr8	33059303	chr8	33059354	-51	DEL	15	1	1	0	1	0
chr8_36326073_chr8_36326149_+-	chr8	36326073	chr8	36326149	-76	DEL	5	0	1	0	1	0
chr8_39150869_chr8_39150961_+-	chr8	39150869	chr8	39150961	-95	DEL	2	1	1	0	0	0
chr8_46638529_chr8_46638598_+-	chr8	46638529	chr8	46638598	-69	DEL	13	0	1	0	1	0
chr8_48434219_chr8_48434288_+-	chr8	48434219	chr8	48434288	-69	DEL	15	1	1	0	1	0
chr8_49713301_chr8_123079456_++	chr8	49713301	chr8	123079456	73366089	INV	22	0	0	1	0	1
chr8_52034988_chr8_52040847_-+	chr8	52034988	chr8	52040847	5858	DUP	39	1	1	0	1	0
chr8_52064234_chr8_52064235_+-	chr8	52064234	chr8	52064235	104	INS	2	1	1	0	0	0
chr8_52123714_chr8_52126806_-+	chr8	52123714	chr8	52126806	3092	DUP	36	1	1	0	1	0
chr8_52323564_chr8_52323632_+-	chr8	52323564	chr8	52323632	-68	DEL	15	1	1	0	1	0
chr8_53468996_chr8_53468997_+-	chr8	53468996	chr8	53468997	97	INS	2	1	1	0	0	0
chr8_53789046_chr8_101493676_+-	chr8	53789046	chr8	101493676	47704624	BND	46	1	1	0	1	1
chr8_54212045_chr8_54936149_++	chr8	54212045	chr8	54936149	724101	INV	52	1	1	0	1	1
chr8_62581815_chr8_62581877_+-	chr8	62581815	chr8	62581877	-62	DEL	2	1	1	0	0	0
chr8_63857156_chr8_63857280_++	chr8	63857156	chr8	63857280	-123	DEL	2	1	1	0	0	0
chr8_64667685_chr8_64667929_+-	chr8	64667685	chr8	64667929	-243	DEL	35	1	0	0	1	0
chr8_65005873_chr22_47093608_++	chr8	65005873	chr22	47093608	0	TRA	37	1	1	0	1	1
chr8_65008109_chr8_65017876_-+	chr8	65008109	chr8	65017876	9766	DUP	21	0	1	0	1	0
chr8_71344801_chr8_122827320_+-	chr8	71344801	chr8	122827320	51482372	BND	29	0	1	1	1	1
chr8_74118272_chr8_74118273_+-	chr8	74118272	chr8	74118273	67	INS	2	1	1	0	0	0
chr8_74811486_chr8_74811489_+-	chr8	74811486	chr8	74811489	2619	INS	2	1	1	0	0	0
chr8_85746323_chr8_85746460_+-	chr8	85746323	chr8	85746460	-138	DEL	2	1	1	0	0	0
chr8_89753714_chr8_89753715_+-	chr8	89753714	chr8	89753715	104	INS	2	1	1	0	0	0
chr8_91834444_chr8_91834444_+-	chr8	91834444	chr8	91834444	123	INS	2	1	1	0	0	0
chr8_97587482_chr8_97587482_+-	chr8	97587482	chr8	97587482	209	INS	2	1	1	0	0	0
chr8_97867211_chr8_97867276_+-	chr8	97867211	chr8	97867276	-65	DEL	15	1	1	0	1	0
chr8_98825808_chr8_98825895_+-	chr8	98825808	chr8	98825895	-82	DEL	2	1	1	0	0	0
chr8_99034443_chr8_99034973_-+	chr8	99034443	chr8	99034973	530	DUP	34	1	1	0	1	0
chr8_100426714_chr8_100426714_+-	chr8	100426714	chr8	100426714	1617	INS	3	1	1	0	0	0
chr8_101300007_chr8_101430726_-+	chr8	101300007	chr8	101430726	130711	DUP	40	1	0	0	1	1
chr8_101365460_chr8_101511167_-+	chr8	101365460	chr8	101511167	145707	DUP	48	1	1	0	1	1
chr8_101430726_chr8_101300010_++	chr8	101430726	chr8	101300010	130718	INV	2	1	0	0	0	1
chr8_101511108_chr8_101365448_++	chr8	101511108	chr8	101365448	145698	INV	2	1	0	0	0	1
chr8_101515860_chr8_101551814_-+	chr8	101515860	chr8	101551814	35958	DUP	46	1	1	0	1	1
chr8_105380794_chr8_105380795_+-	chr8	105380794	chr8	105380795	69	INS	2	1	1	0	0	0
chr8_107781705_chr8_107782752_+-	chr8	107781705	chr8	107782752	-1047	DEL	12	0	1	0	1	0
chr8_116869521_chr8_116884501_+-	chr8	116869521	chr8	116884501	-14979	DEL	37	1	1	0	1	0
chr8_119050648_chr8_119070624_-+	chr8	119050648	chr8	119070624	19977	DUP	36	1	1	0	1	0
chr8_120129466_chr8_120129691_+-	chr8	120129466	chr8	120129691	-225	DEL	36	1	1	0	1	0
chr8_120179938_chr8_125301272_+-	chr8	120179938	chr8	125301272	-5121916	DEL	48	1	1	1	1	1
chr8_120362668_chr8_121390301_++	chr8	120362668	chr8	121390301	1027709	INV	49	0	1	0	1	1
chr8_120920558_chr8_120920559_+-	chr8	120920558	chr8	120920559	864	INS	2	1	1	0	0	0
chr8_121390126_chr8_121391095_++	chr8	121390126	chr8	121391095	974	INV	12	0	1	0	1	0
chr8_121729660_chr8_123891569_++	chr8	121729660	chr8	123891569	2161910	INV	53	1	1	0	1	1
chr8_122096389_chr8_123807267_++	chr8	122096389	chr8	123807267	1710879	INV	50	1	0	0	1	1
chr8_123314990_chr8_123315348_++	chr8	123314990	chr8	123315348	-421	DEL	2	1	1	0	0	0
chr8_123317779_chr8_124404210_+-	chr8	123317779	chr8	124404210	-1086419	DEL	39	0	0	0	1	1
chr8_123610501_chr8_123610556_+-	chr8	123610501	chr8	123610556	-55	DEL	14	1	1	0	1	0
chr8_123856019_chr8_123856025_+-	chr8	123856019	chr8	123856025	166	INS	3	1	1	0	0	0
chr8_124195488_chr8_133529087_-+	chr8	124195488	chr8	133529087	9333569	DUP	36	0	0	0	1	1
chr8_125306588_chr8_125306843_+-	chr8	125306588	chr8	125306843	-255	DEL	28	1	1	0	1	0
chr8_125309324_chr8_125311149_++	chr8	125309324	chr8	125311149	1830	INV	34	0	1	0	1	0
chr8_125338774_chr8_125338833_+-	chr8	125338774	chr8	125338833	-59	DEL	13	1	0	0	1	0
chr8_126215952_chr8_126216016_+-	chr8	126215952	chr8	126216016	-64	DEL	13	1	1	0	1	0
chr8_126997700_chr8_126997700_+-	chr8	126997700	chr8	126997700	56	INS	2	1	1	0	0	0
chr8_127175880_chr8_127245936_-+	chr8	127175880	chr8	127245936	70055	DUP	22	0	0	0	1	1
chr8_127310454_chr8_127476886_-+	chr8	127310454	chr8	127476886	166434	DUP	50	1	0	0	1	1
chr8_127476887_chr8_127310454_++	chr8	127476887	chr8	127310454	166431	INV	6	1	0	0	0	1
chr8_127849923_chr8_127849924_+-	chr8	127849923	chr8	127849924	215	INS	3	1	1	0	0	0
chr8_128825650_chr8_128825651_+-	chr8	128825650	chr8	128825651	188	INS	2	1	1	0	0	0
chr8_128826028_chr8_128826029_+-	chr8	128826028	chr8	128826029	189	INS	2	1	1	0	0	0
chr8_128870585_chr8_128870586_+-	chr8	128870585	chr8	128870586	87	INS	2	1	1	0	0	0
chr8_130070928_chr8_130071037_+-	chr8	130070928	chr8	130071037	-116	DEL	2	1	1	0	0	0
chr8_131216170_chr8_131216429_+-	chr8	131216170	chr8	131216429	-284	DEL	2	1	1	0	0	0
chr8_131265406_chr8_131268288_++	chr8	131265406	chr8	131268288	-2884	DEL	3	1	1	0	0	0
chr8_132187766_chr8_132187929_+-	chr8	132187766	chr8	132187929	-135	DEL	2	0	1	0	1	0
chr8_133232456_chr8_133512727_+-	chr8	133232456	chr8	133512727	-280268	DEL	55	1	0	0	1	1
chr8_134319081_chr8_134319160_+-	chr8	134319081	chr8	134319160	-79	DEL	12	1	0	0	1	0
chr8_135835175_chr8_135835243_+-	chr8	135835175	chr8	135835243	-58	DEL	3	1	1	0	0	0
chr8_136030915_chr8_136031003_+-	chr8	136030915	chr8	136031003	-88	DEL	14	1	1	0	1	0
chr8_139872336_chr8_139872521_++	chr8	139872336	chr8	139872521	-185	DEL	3	1	1	0	1	0
chr8_140195912_chr8_140195913_+-	chr8	140195912	chr8	140195913	152	INS	2	1	1	0	0	0
chr8_141121916_chr8_141121916_+-	chr8	141121916	chr8	141121916	87	INS	4	1	1	0	0	0
chr8_141252572_chr8_141252641_++	chr8	141252572	chr8	141252641	-68	DEL	2	1	1	0	0	0
chr8_141415696_chr8_141415723_+-	chr8	141415696	chr8	141415723	5696	INS	2	1	1	0	0	0
chr8_141437054_chr8_141437173_+-	chr8	141437054	chr8	141437173	-113	DEL	3	1	1	0	0	0
chr8_141493095_chr8_141493095_+-	chr8	141493095	chr8	141493095	282	INS	3	1	1	0	0	0
chr8_141631977_chr8_141633104_++	chr8	141631977	chr8	141633104	1674	INV	2	0	1	0	1	0
chr8_141872071_chr8_141872071_+-	chr8	141872071	chr8	141872071	60	INS	3	1	1	0	0	0
chr8_141874167_chr8_141874168_+-	chr8	141874167	chr8	141874168	137	INS	2	1	1	0	0	0
chr8_142013037_chr8_142013038_+-	chr8	142013037	chr8	142013038	64	INS	2	1	1	0	0	0
chr8_142110344_chr8_142110446_++	chr8	142110344	chr8	142110446	-103	DEL	2	1	1	0	0	0
chr8_142169856_chr8_142169911_+-	chr8	142169856	chr8	142169911	-55	DEL	3	1	1	0	0	0
chr8_142222762_chr8_142222762_+-	chr8	142222762	chr8	142222762	359	INS	3	1	1	0	0	0
chr8_142500267_chr8_142500319_++	chr8	142500267	chr8	142500319	-57	DEL	2	1	1	0	0	0
chr8_143072305_chr8_143072316_+-	chr8	143072305	chr8	143072316	147	INS	3	1	1	0	0	0
chr8_143487363_chr8_143487871_++	chr8	143487363	chr8	143487871	-507	DEL	2	1	1	0	0	0
chr8_143981916_chr8_143981920_+-	chr8	143981916	chr8	143981920	78	INS	3	1	1	0	0	0
chr8_144023829_chr8_144023836_+-	chr8	144023829	chr8	144023836	145	INS	3	1	1	0	0	0
chr8_144125604_chr8_144126057_-+	chr8	144125604	chr8	144126057	459	DUP	2	1	1	0	0	0
chr8_144382161_chr8_144382162_+-	chr8	144382161	chr8	144382162	105	INS	2	1	1	0	0	0
chr8_144555254_chr9_136346553_++	chr8	144555254	chr9	136346553	0	TRA	28	1	0	0	1	1
chr8_144624678_chr8_144625489_++	chr8	144624678	chr8	144625489	-750	DEL	3	1	1	0	0	0
chr8_144636349_chr8_144636416_+-	chr8	144636349	chr8	144636416	-67	DEL	14	1	1	0	1	0
chr9_1488781_chr9_1488978_+-	chr9	1488781	chr9	1488978	-197	DEL	37	1	1	0	1	0
chr9_7052909_chr9_7052909_+-	chr9	7052909	chr9	7052909	55	INS	3	1	1	0	0	0
chr9_9791044_chr9_9791109_+-	chr9	9791044	chr9	9791109	-65	DEL	14	1	1	0	1	0
chr9_11319305_chr9_11322932_-+	chr9	11319305	chr9	11322932	3627	DUP	35	0	1	0	1	0
chr9_14205840_chr9_14205983_-+	chr9	14205840	chr9	14205983	-146	DEL	25	1	1	0	1	0
chr9_14990057_chr9_14990108_+-	chr9	14990057	chr9	14990108	-51	DEL	14	1	1	0	1	0
chr9_15984190_chr9_15984190_+-	chr9	15984190	chr9	15984190	88	INS	3	1	1	0	0	0
chr9_18303651_chr9_18309380_-+	chr9	18303651	chr9	18309380	5732	DUP	36	1	1	0	1	0
chr9_21771735_chr9_22011885_+-	chr9	21771735	chr9	22011885	-240147	DEL	55	1	0	0	1	1
chr9_29829104_chr9_29829424_+-	chr9	29829104	chr9	29829424	-320	DEL	36	1	1	0	1	0
chr9_32360398_chr9_32360399_+-	chr9	32360398	chr9	32360399	91	INS	2	1	1	0	0	0
chr9_33098778_chrX_130571501_++	chr9	33098778	chrX	130571501	0	TRA	30	1	1	0	1	1
chr9_33152434_chrX_130581720_++	chr9	33152434	chrX	130581720	0	TRA	40	1	1	0	1	1
chr9_38571385_chr9_38581933_+-	chr9	38571385	chr9	38581933	-10548	DEL	37	1	1	0	1	0
chr9_40923194_chr9_40924340_++	chr9	40923194	chr9	40924340	-1147	DEL	2	1	1	0	0	0
chr9_42734923_chr9_42734924_+-	chr9	42734923	chr9	42734924	76	INS	2	1	1	0	0	0
chr9_67068452_chr9_67068510_+-	chr9	67068452	chr9	67068510	-60	DEL	2	1	1	0	0	0
chr9_68242158_chr9_68242220_++	chr9	68242158	chr9	68242220	-62	DEL	2	1	1	0	0	0
chr9_69329976_chr9_69330057_++	chr9	69329976	chr9	69330057	-76	DEL	2	1	1	0	0	0
chr9_75614129_chr9_75621545_-+	chr9	75614129	chr9	75621545	7416	DUP	36	1	1	0	1	0
chr9_78464230_chr9_78523230_-+	chr9	78464230	chr9	78523230	59004	DUP	45	0	1	0	1	1
chr9_81620228_chr9_81625369_-+	chr9	81620228	chr9	81625369	5140	DUP	35	0	1	0	1	0
chr9_83246669_chr9_83269194_-+	chr9	83246669	chr9	83269194	22528	DUP	35	1	1	0	1	0
chr9_83969153_chr9_84015113_-+	chr9	83969153	chr9	84015113	45965	DUP	45	1	1	0	1	1
chr9_85020139_chr9_85050259_-+	chr9	85020139	chr9	85050259	30122	DUP	41	1	1	0	1	1
chr9_86778978_chr9_86779931_+-	chr9	86778978	chr9	86779931	-952	DEL	35	0	1	0	1	0
chr9_89792818_chr9_89800657_-+	chr9	89792818	chr9	89800657	7838	DUP	36	1	1	0	1	0
chr9_90884158_chr9_90884159_+-	chr9	90884158	chr9	90884159	137	INS	2	1	1	0	0	0
chr9_90989153_chr9_91320639_-+	chr9	90989153	chr9	91320639	331412	DUP	36	1	1	0	1	1
chr9_91796947_chr9_91797566_+-	chr9	91796947	chr9	91797566	-755	DEL	2	1	1	0	0	0
chr9_95113650_chr9_95129312_-+	chr9	95113650	chr9	95129312	15662	DUP	32	1	1	0	1	0
chr9_105570632_chr9_105584830_+-	chr9	105570632	chr9	105584830	-14197	DEL	37	1	1	0	1	0
chr9_107162629_chr20_33962986_++	chr9	107162629	chr20	33962986	0	TRA	29	1	1	0	1	1
chr9_111641657_chr9_111641972_+-	chr9	111641657	chr9	111641972	-312	DEL	2	1	1	0	0	0
chr9_118279382_chr9_118279438_+-	chr9	118279382	chr9	118279438	-56	DEL	15	1	1	0	1	0
chr9_119040348_chr9_119040354_+-	chr9	119040348	chr9	119040354	102	INS	3	1	1	0	0	0
chr9_121176918_chr9_121177079_+-	chr9	121176918	chr9	121177079	-160	DEL	37	1	1	0	1	0
chr9_124678533_chr9_124678589_+-	chr9	124678533	chr9	124678589	-56	DEL	14	1	1	0	1	0
chr9_126478141_chr9_126478210_+-	chr9	126478141	chr9	126478210	-69	DEL	15	1	1	0	1	0
chr9_130603264_chr9_131394697_-+	chr9	130603264	chr9	131394697	791374	DUP	40	0	0	0	1	1
chr9_130958808_chr9_130958839_+-	chr9	130958808	chr9	130958839	278	INS	3	1	1	0	0	0
chr9_132430567_chr9_132438238_-+	chr9	132430567	chr9	132438238	7672	DUP	37	1	1	0	1	0
chr9_133214439_chr9_133214491_+-	chr9	133214439	chr9	133214491	-52	DEL	12	0	1	0	1	0
chr9_134476139_chr9_134476140_+-	chr9	134476139	chr9	134476140	140	INS	2	1	1	0	0	0
chr9_134501437_chr9_134501447_+-	chr9	134501437	chr9	134501447	238	INS	3	1	1	0	0	0
chr9_134644358_chr9_134644359_+-	chr9	134644358	chr9	134644359	66	INS	2	1	1	0	0	0
chr9_134714388_chr9_134714389_+-	chr9	134714388	chr9	134714389	1495	INS	2	1	1	0	0	0
chr9_135679819_chr9_135679820_+-	chr9	135679819	chr9	135679820	231	INS	2	1	1	0	0	0
chr9_135727088_chr9_135727091_+-	chr9	135727088	chr9	135727091	72	INS	2	1	1	0	0	0
chr9_136101706_chr9_136101707_+-	chr9	136101706	chr9	136101707	78	INS	2	1	1	0	0	0
chr9_136346553_chr8_144555259_-+	chr9	136346553	chr8	144555259	0	TRA	18	1	0	0	1	1
chr9_136598628_chr9_136598628_+-	chr9	136598628	chr9	136598628	196	INS	3	1	1	0	0	0
chr9_136803016_chr9_136803017_+-	chr9	136803016	chr9	136803017	690	INS	2	1	1	0	0	0
chr9_137102261_chr9_137102262_+-	chr9	137102261	chr9	137102262	1665	INS	2	1	1	0	0	0
chr9_137145040_chr9_137145213_++	chr9	137145040	chr9	137145213	-201	DEL	2	1	1	0	0	0
chr9_137342183_chr9_137342184_+-	chr9	137342183	chr9	137342184	76	INS	2	1	1	0	0	0
chr9_137379350_chr9_137379350_+-	chr9	137379350	chr9	137379350	300	INS	2	1	1	0	0	0
chr9_137716429_chr9_137716430_+-	chr9	137716429	chr9	137716430	786	INS	2	1	1	0	0	0
chr9_137818759_chr9_137819193_+-	chr9	137818759	chr9	137819193	-464	DEL	2	1	1	0	0	0
chr9_138069330_chr9_138069383_+-	chr9	138069330	chr9	138069383	-53	DEL	14	1	1	0	1	0
Table S4: SV High Confidence Consensus Call Set. The SVs from initial callset are futher filtered based on consensus scores, SVs that were called in at least two platform call sets by multiple software tools were selected. Additional filtering applied to remove overlap SVs and SVs on the black list regions as well as the on three chromosomal regions with normal loss of heterozygosity LOH (chr6p, …
